# Supplementary material for: How an ancient, salt-tolerant fruit crop, Ficus carica L., copes with salinity: a transcriptome analysis
Source: PubMed Central journal article supplement (PMC6385202; doi:10.1038/s41598-019-39114-4), 2019-02-22
Supplement: 41598_2019_39114_MOESM1_ESM.pdf [file 41598_2019_39114_MOESM1_ESM.pdf]

# **How an ancient, salt-tolerant fruit crop, *Ficus carica* L., copes with salinity: a transcriptome analysis**

**SUPPLEMENTARY MATERIALS: Tables S1-S4, Figure S1-S6**

Alberto Vangelisti, Liceth Solorzano Zambrano, Giovanni Caruso, Desiré Macheda, Rodolfo Bernardi, Gabriele Usai, Flavia Mascagni, Tommaso Giordani, Riccardo Gucci, Andrea Cavallini & Lucia Natali

Department of Agriculture, Food, and Environment, University of Pisa, Via del Borghetto 80, I-56124, Pisa, Italy. Correspondence and requests for materials should be addressed to L.N. (email:[lucia.natali@unipi.it](mailto:lucia.natali@unipi.it))

**Table S1.** Number of raw and trimmed Illumina paired-end reads used in the experiments and number of reads matching to the *F. carica* cv. Horaishi transcriptome (Mori et al. 2017) for each library. c24= control leaves 24 days after treatment, c48= control leaves 48 days after treatment, s24= salt stress leaves 24 days after treatment, s48= salt stress leaves 48 days after treatment.

| <b>Library nr. and treatment</b> | <b>Number of raw reads</b> | <b>Number of reads after trimming</b> | <b>Number of mapped reads onto <i>F. carica</i> transcriptome</b> | <b>Percentage of mapped reads onto <i>F. carica</i> transcriptome</b> |
|----------------------------------|----------------------------|---------------------------------------|-------------------------------------------------------------------|-----------------------------------------------------------------------|
| 1 (c24)                          | 20,466,392                 | 19,656,486                            | 14,493,872                                                        | 73.74                                                                 |
| 2 (c24)                          | 13,598,862                 | 13,207,584                            | 9,825,343                                                         | 74.39                                                                 |
| 3 (c24)                          | 15,094,998                 | 14,614,598                            | 10,462,566                                                        | 71.59                                                                 |
| 4 (s24)                          | 16,451,494                 | 15,787,836                            | 11,586,185                                                        | 73.39                                                                 |
| 5 (s24)                          | 14,988,358                 | 14,479,386                            | 10,686,045                                                        | 73.8                                                                  |
| 6 (s24)                          | 14,385,156                 | 13,820,318                            | 10,199,528                                                        | 73.8                                                                  |
| 7 (c48)                          | 61,639,892                 | 58,183,090                            | 42,888,532                                                        | 73.71                                                                 |
| 8 (c48)                          | 21,256,610                 | 20,130,780                            | 15,137,335                                                        | 75.19                                                                 |
| 9 (c48)                          | 19,393,686                 | 18,677,070                            | 14,172,766                                                        | 75.88                                                                 |
| 10 (s48)                         | 15,743,236                 | 15,399,566                            | 11,615,583                                                        | 75.43                                                                 |
| 11 (s48)                         | 21,000,134                 | 20,236,072                            | 15,129,672                                                        | 74.77                                                                 |
| 12 (s48)                         | 14,772,974                 | 14,346,828                            | 10,551,384                                                        | 73.55                                                                 |

**Table S2.** Differentially expressed genes (DEGs) over and under expressed in response to salt after 24 (D24) and 48 (D48) days of treatment. Blue-evidenced DEGs are the 100 highest fold change per class. LogFC= log fold change, FDR= adjusted P value with false discovery rate.

| genes        | logFC | FDR   | product                                      | description                                                                             | Expression        | Time point |
|--------------|-------|-------|----------------------------------------------|-----------------------------------------------------------------------------------------|-------------------|------------|
| s00080g07240 | 6,916 | 0,000 | cytochrome P450 82A3                         | Cytochrome P450 82A3 [Morus notabilis]<br>gij587919895 gb EXC07349.1                    | Over<br>Expressed | D24        |
| s00025g03163 | 6,853 | 0,005 | aluminum-activated malate transporter 12     | Aluminum-activated malate transporter 12 [Morus notabilis]                              | Over<br>Expressed | D24        |
| s00876g24803 | 6,588 | 0,004 | -                                            | PREDICTED: extensin-2 isoform X2 [Vigna radiata var. radiata]                           | Over<br>Expressed | D24        |
| s00169g11264 | 6,482 | 0,000 | -                                            | transmembrane protein, putative [Medicago truncatula]                                   | Over<br>Expressed | D24        |
| s11940g33512 | 5,455 | 0,004 | TFL1-like protein                            | TFL1-like protein [Fragaria vesca]                                                      | Over<br>Expressed | D24        |
| s00014g02049 | 5,432 | 0,012 | -                                            | PREDICTED: beta-fructofuranosidase, cell wall isozyme-like [Cicer arietinum]            | Over<br>Expressed | D24        |
| s00928g25376 | 5,427 | 0,014 | -                                            | **** No hits found ****                                                                 | Over<br>Expressed | D24        |
| s00097g08100 | 5,244 | 0,031 | -                                            | **** No hits found ****                                                                 | Over<br>Expressed | D24        |
| s00609g21531 | 5,183 | 0,006 | -                                            | **** No hits found ****                                                                 | Over<br>Expressed | D24        |
| s03038g31142 | 5,036 | 0,010 | -                                            | Copia protein [Morus notabilis]<br>gij587885647 gb EXB74504.1                           | Over<br>Expressed | D24        |
| s00694g22691 | 4,873 | 0,020 | -                                            | ### Not characterized<br>###:hypothetical protein<br>PRUPE_ppa023320mg [Prunus persica] | Over<br>Expressed | D24        |
| s00188g11944 | 4,869 | 0,019 | -                                            | **** No hits found ****                                                                 | Over<br>Expressed | D24        |
| s00283g14790 | 4,686 | 0,027 | -                                            | **** No hits found ****                                                                 | Over<br>Expressed | D24        |
| s00080g07229 | 4,678 | 0,037 | disease resistance-responsive family protein | Disease resistance-responsive family protein [Theobroma cacao]                          | Over<br>Expressed | D24        |
| s00733g23197 | 4,474 | 0,048 | -                                            | **** No hits found ****                                                                 | Over<br>Expressed | D24        |
| s21097g35200 | 4,216 | 0,014 | disease resistance protein RPM1              | Disease resistance protein RPM1 [Morus notabilis]                                       | Over<br>Expressed | D24        |
| s00051g05315 | 3,889 | 0,000 | -                                            | PREDICTED: protein NRT1/ PTR FAMILY 5.6-like [Prunus mume]                              | Over<br>Expressed | D24        |
| s18818g34833 | 3,690 | 0,025 | -                                            | Agamous-like MADS-box protein AGL8 [Morus notabilis]                                    | Over<br>Expressed | D24        |
| s00306g15416 | 3,339 | 0,001 | -                                            | PREDICTED: cucumis-like [Vitis vinifera]                                                | Over<br>Expressed | D24        |
| s03704g31357 | 3,086 | 0,025 | -                                            | PREDICTED: random slug protein 5 [Cucumis melo]                                         | Over<br>Expressed | D24        |
| s00785g23824 | 3,081 | 0,008 | isoflavone 2'-hydroxylase                    | Isoflavone 2'-hydroxylase [Morus notabilis]                                             | Over<br>Expressed | D24        |
| s03458g31279 | 3,004 | 0,006 | -                                            | ### Not characterized<br>###:hypothetical protein<br>L484_012677 [Morus notabilis]      | Over<br>Expressed | D24        |

|              |       |       |                                                |                                                                                                                        |                |     |
|--------------|-------|-------|------------------------------------------------|------------------------------------------------------------------------------------------------------------------------|----------------|-----|
| s00620g21689 | 3,001 | 0,000 | transcription factor bHLH10-like               | PREDICTED: transcription factor bHLH10-like [Pyrus x bretschneideri] gi 694397183 ref XP_009373851.1                   | Over Expressed | D24 |
| s00018g02534 | 2,807 | 0,015 | -                                              | PREDICTED: putative late blight resistance protein homolog R1B-19 [Populus euphratica] gi 743852780 ref XP_011029353.1 | Over Expressed | D24 |
| s00748g23382 | 2,783 | 0,003 | ethylene-responsive transcription factor WR1   | Ethylene-responsive transcription factor WR1 [Morus notabilis]                                                         | Over Expressed | D24 |
| s00591g21218 | 2,775 | 0,003 | similar to L484_004420                         | ### Not characterized<br>###:hypothetical protein L484_004420 [Morus notabilis]                                        | Over Expressed | D24 |
| s00205g12522 | 2,726 | 0,031 | -                                              | **** No hits found ****                                                                                                | Over Expressed | D24 |
| s00593g21248 | 2,629 | 0,043 | -                                              | Putative F-box/LRR-repeat protein [Morus notabilis]                                                                    | Over Expressed | D24 |
| s00620g21688 | 2,622 | 0,028 | similar to L484_023851                         | ### Not characterized<br>###:hypothetical protein L484_023851 [Morus notabilis]                                        | Over Expressed | D24 |
| s00153g10646 | 2,571 | 0,000 | B3 domain-containing transcription factor VRN1 | B3 domain-containing transcription factor VRN1 [Morus notabilis]                                                       | Over Expressed | D24 |
| s00023g03041 | 2,566 | 0,026 | -                                              | ### Not characterized<br>###:hypothetical protein L484_012049 [Morus notabilis]                                        | Over Expressed | D24 |
| s00111g08780 | 2,496 | 0,000 | C globular stage                               | C globular stage, putative [Theobroma cacao]                                                                           | Over Expressed | D24 |
| s07100g32310 | 2,496 | 0,035 | peptide/nitrate transporter                    | putative peptide/nitrate transporter [Morus notabilis]                                                                 | Over Expressed | D24 |
| s00364g16843 | 2,492 | 0,000 | F-box protein                                  | F-box protein [Morus notabilis] gi 587851439 gb EXB41588.1                                                             | Over Expressed | D24 |
| s00094g07968 | 2,386 | 0,037 | -                                              | PREDICTED: protein LURP-one-related 4 [Vitis vinifera]                                                                 | Over Expressed | D24 |
| s00043g04670 | 2,366 | 0,012 | mtN26                                          | MtN26 [Medicago truncatula] gi 657404281 gb KEH43026.1 <br>MtN26 [Medicago truncatula]                                 | Over Expressed | D24 |
| s00003g00605 | 2,239 | 0,002 | -                                              | ### Not characterized<br>###:hypothetical protein L484_007652 [Morus notabilis]                                        | Over Expressed | D24 |
| s14537g34056 | 2,235 | 0,012 | uncharacterized protein LOC105969824           | ### Not characterized<br>###:PREDICTED: uncharacterized protein LOC105969824 [Erythranthe guttata]                     | Over Expressed | D24 |
| s00041g04549 | 2,212 | 0,004 | sulfate transporter 3.4                        | putative sulfate transporter 3.4 [Morus notabilis]                                                                     | Over Expressed | D24 |
| s00247g13804 | 2,209 | 0,011 | E3 ubiquitin-protein ligase RHA2A              | E3 ubiquitin-protein ligase RHA2A [Morus notabilis]                                                                    | Over Expressed | D24 |
| s00622g21717 | 2,193 | 0,024 | -                                              | **** No hits found ****                                                                                                | Over Expressed | D24 |

|              |       |       |                                             |                                                                                                   |                |     |
|--------------|-------|-------|---------------------------------------------|---------------------------------------------------------------------------------------------------|----------------|-----|
| s00114g08941 | 2,189 | 0,000 | DNA ligase                                  | DNA ligase [Gossypium arboreum]                                                                   | Over Expressed | D24 |
| s17600g34609 | 2,181 | 0,017 | disease resistance protein RPM1             | Disease resistance protein RPM1 [Morus notabilis]                                                 | Over Expressed | D24 |
| s00023g02999 | 2,095 | 0,002 | BTB/POZ domain-containing protein POB1-like | PREDICTED: BTB/POZ domain-containing protein POB1-like [Vitis vinifera]                           | Over Expressed | D24 |
| s01125g26995 | 2,034 | 0,030 | -                                           | ### Not characterized<br>###:hypothetical protein L484_021458 [Morus notabilis]                   | Over Expressed | D24 |
| s00143g10212 | 2,015 | 0,042 | -                                           | **** No hits found ****                                                                           | Over Expressed | D24 |
| s00679g22491 | 2,002 | 0,000 | nuclear transcription factor Y subunit A-9  | Nuclear transcription factor Y subunit A-9 [Morus notabilis]                                      | Over Expressed | D24 |
| s00857g24607 | 1,981 | 0,001 | uncharacterized protein LOC105640359        | ### Not characterized<br>###:PREDICTED: uncharacterized protein LOC105640359 [Jatropha curcas]    | Over Expressed | D24 |
| s00624g21744 | 1,979 | 0,008 | -                                           | ### Not characterized<br>###:hypothetical protein VITISV_041073 [Vitis vinifera]                  | Over Expressed | D24 |
| s00508g19829 | 1,973 | 0,000 | -                                           | ### Not characterized<br>###:PREDICTED: uncharacterized protein LOC104881291 [Vitis vinifera]     | Over Expressed | D24 |
| s00001g00053 | 1,959 | 0,005 | -                                           | PREDICTED: uncharacterized mitochondrial protein AtMg00810-like [Glycine max]                     | Over Expressed | D24 |
| s00016g02282 | 1,950 | 0,000 | -                                           | PREDICTED: probable root meristem growth factor 8 [Prunus mume]                                   | Over Expressed | D24 |
| s02934g31106 | 1,935 | 0,000 | -                                           | **** No hits found ****                                                                           | Over Expressed | D24 |
| s00614g21590 | 1,922 | 0,000 | -                                           | Auxin-induced protein 5NG4 [Morus notabilis]                                                      | Over Expressed | D24 |
| s00100g08254 | 1,904 | 0,000 | phosphoglucomutase / glucose phosphomutase  | Phosphoglucomutase / glucose phosphomutase, putative [Theobroma cacao] gij508709124 gb EOY01021.1 | Over Expressed | D24 |
| s19544g34955 | 1,901 | 0,010 | -                                           | PREDICTED: putative methyltransferase C9orf114 [Jatropha curcas]                                  | Over Expressed | D24 |
| s00080g07239 | 1,883 | 0,027 | cytochrome P450 82A3                        | Cytochrome P450 82A3 [Morus notabilis] gij587919895 gb EXC07349.1                                 | Over Expressed | D24 |
| s00419g18056 | 1,848 | 0,043 | MLO-like protein 2                          | PREDICTED: MLO-like protein 2, partial [Prunus mume]                                              | Over Expressed | D24 |
| s00149g10484 | 1,799 | 0,003 | inorganic phosphate transporter 1-7         | putative inorganic phosphate transporter 1-7 [Morus notabilis]                                    | Over Expressed | D24 |
| s00261g14202 | 1,741 | 0,039 | acyl-protein thioesterase 2-like            | PREDICTED: acyl-protein thioesterase 2-like [Populus euphratica]                                  | Over Expressed | D24 |
| s00147g10413 | 1,733 | 0,000 | granule-bound starch synthase 1             | Granule-bound starch synthase 1 [Morus notabilis]                                                 | Over Expressed | D24 |

|              |       |       |                                                                                       |                                                                                                                        |                   |     |
|--------------|-------|-------|---------------------------------------------------------------------------------------|------------------------------------------------------------------------------------------------------------------------|-------------------|-----|
| s00145g10292 | 1,723 | 0,001 | -                                                                                     | ### Not characterized<br>###:hypothetical protein<br>L484_025067 [Morus notabilis]                                     | Over<br>Expressed | D24 |
| s01806g30007 | 1,718 | 0,046 | S-adenosylmethionine-dependent<br>methyltransferase                                   | putative S-adenosylmethionine-<br>dependent methyltransferase<br>[Morus notabilis]<br>gi 587935268 gb EXC22151.1       | Over<br>Expressed | D24 |
| s00129g09612 | 1,717 | 0,000 | chaperonin 60 subunit beta 4                                                          | Chaperonin 60 subunit beta 4<br>[Morus notabilis]                                                                      | Over<br>Expressed | D24 |
| s00067g06394 | 1,712 | 0,038 | serine/threonine-protein kinase                                                       | Serine/threonine-protein kinase<br>[Morus notabilis]                                                                   | Over<br>Expressed | D24 |
| s00281g14755 | 1,702 | 0,000 | adagio protein 3                                                                      | Adagio protein 3 [Morus notabilis]<br>gi 587841729 gb EXB32326.1                                                       | Over<br>Expressed | D24 |
| s00712g22909 | 1,700 | 0,007 | serine/threonine-protein<br>phosphatase 6 regulatory ankyrin<br>repeat subunit B-like | PREDICTED: serine/threonine-<br>protein phosphatase 6 regulatory<br>ankyrin repeat subunit B-like<br>[Malus domestica] | Over<br>Expressed | D24 |
| s00082g07320 | 1,700 | 0,040 | myb-related protein MYBAS1                                                            | Myb-related protein MYBAS1<br>[Morus notabilis]                                                                        | Over<br>Expressed | D24 |
| s20456g35106 | 1,697 | 0,018 | -                                                                                     | ***** No hits found *****                                                                                              | Over<br>Expressed | D24 |
| s25528g35814 | 1,695 | 0,008 | -                                                                                     | ***** No hits found *****                                                                                              | Over<br>Expressed | D24 |
| s00065g06255 | 1,688 | 0,001 | adenylate isopentenyltransferase<br>3                                                 | Adenylate isopentenyltransferase 3<br>[Morus notabilis]                                                                | Over<br>Expressed | D24 |
| s00096g08061 | 1,676 | 0,009 | cytochrome P450 isoform 1                                                             | Cytochrome P450 isoform 1<br>[Theobroma cacao]                                                                         | Over<br>Expressed | D24 |
| s00080g07242 | 1,667 | 0,002 | cytochrome P450 82A3                                                                  | Cytochrome P450 82A3 [Morus<br>notabilis]<br>gi 587919895 gb EXC07349.1                                                | Over<br>Expressed | D24 |
| s00319g15780 | 1,654 | 0,001 | alpha-1,4 glucan phosphorylase L<br>isozyme                                           | Alpha-1,4 glucan phosphorylase L<br>isozyme [Morus notabilis]                                                          | Over<br>Expressed | D24 |
| s00673g22420 | 1,633 | 0,001 | pentatricopeptide repeat-<br>containing protein At1g12700,<br>mitochondrial           | PREDICTED: putative<br>pentatricopeptide repeat-containing<br>protein At1g12700, mitochondrial<br>[Malus domestica]    | Over<br>Expressed | D24 |
| s00429g18275 | 1,633 | 0,001 | anion transporter 5                                                                   | PREDICTED: probable anion<br>transporter 5 [Gossypium<br>raimondii]                                                    | Over<br>Expressed | D24 |
| s00112g08810 | 1,625 | 0,001 | -                                                                                     | PREDICTED: Fanconi anemia<br>group I protein [Prunus mume]                                                             | Over<br>Expressed | D24 |
| s00192g12092 | 1,617 | 0,017 | LRR receptor-like<br>serine/threonine-protein kinase                                  | putative LRR receptor-like<br>serine/threonine-protein kinase<br>[Morus notabilis]<br>gi 587849092 gb EXB39332.1       | Over<br>Expressed | D24 |
| s00405g17761 | 1,614 | 0,000 | similar to L484_020058                                                                | ### Not characterized<br>###:hypothetical protein<br>L484_020058 [Morus notabilis]                                     | Over<br>Expressed | D24 |
| s02020g30426 | 1,592 | 0,000 | -                                                                                     | putative Ty1-copia-like<br>retrotransposon [Cercis chinensis]                                                          | Over<br>Expressed | D24 |
| s00069g06496 | 1,588 | 0,008 | -                                                                                     | Chloroplastic group IIA intron<br>splicing facilitator CRS1,<br>chloroplastic [Glycine soja]                           | Over<br>Expressed | D24 |

|              |       |       |                                                                                        |                                                                                                                 |                |     |
|--------------|-------|-------|----------------------------------------------------------------------------------------|-----------------------------------------------------------------------------------------------------------------|----------------|-----|
| s00191g12052 | 1,581 | 0,000 | 26S proteasome non-ATPase regulatory subunit 10                                        | 26S proteasome non-ATPase regulatory subunit 10 [Morus notabilis]                                               | Over Expressed | D24 |
| s00477g19233 | 1,577 | 0,001 | similar to L484_013265                                                                 | ### Not characterized<br>###:hypothetical protein L484_013265 [Morus notabilis]                                 | Over Expressed | D24 |
| s00005g00946 | 1,572 | 0,001 | receptor-like cytosolic serine/threonine-protein kinase RBK2                           | Receptor-like cytosolic serine/threonine-protein kinase RBK2 [Morus notabilis] gj 587918190 gb EXC05707.1       | Over Expressed | D24 |
| s00454g18802 | 1,563 | 0,002 | -                                                                                      | ### Not characterized<br>###:hypothetical protein L484_026905 [Morus notabilis]                                 | Over Expressed | D24 |
| s07428g32405 | 1,559 | 0,007 | similar to L484_017568                                                                 | ### Not characterized<br>###:hypothetical protein L484_017568 [Morus notabilis]                                 | Over Expressed | D24 |
| s01287g28013 | 1,556 | 0,000 | aldehyde dehydrogenase family 2 member C4                                              | Aldehyde dehydrogenase family 2 member C4 [Morus notabilis]                                                     | Over Expressed | D24 |
| s00041g04572 | 1,555 | 0,003 | mitochondrial carnitine/acylcarnitine carrier protein CACL                             | Mitochondrial carnitine/acylcarnitine carrier protein CACL [Morus notabilis] gj 587885639 gb EXB74496.1         | Over Expressed | D24 |
| s00260g14182 | 1,540 | 0,008 | mitochondrial rRNA methyltransferase                                                   | Mitochondrial rRNA methyltransferase [Morus notabilis]                                                          | Over Expressed | D24 |
| s00086g07516 | 1,533 | 0,025 | -                                                                                      | putative membrane-associated kinase regulator 6 -like protein [Gossypium arboreum]                              | Over Expressed | D24 |
| s00033g03875 | 1,521 | 0,035 | acyl-protein thioesterase 2                                                            | Acyl-protein thioesterase 2 [Morus notabilis]                                                                   | Over Expressed | D24 |
| s00014g02114 | 1,520 | 0,041 | nodulation-signaling pathway 1 protein isoform X2                                      | PREDICTED: nodulation-signaling pathway 1 protein isoform X1 [Vitis vinifera] gj 731401830 ref XP_010654436.1   | Over Expressed | D24 |
| s01090g26759 | 1,502 | 0,000 | J domain-containing protein requiredfor chloroplast accumulation response 1 isoform X1 | PREDICTED: J domain-containing protein requiredfor chloroplast accumulation response 1 isoform X1 [Prunus mume] | Over Expressed | D24 |
| s00183g11749 | 1,501 | 0,024 | cation/H(+) antiporter 15                                                              | Cation/H(+) antiporter 15 [Morus notabilis]                                                                     | Over Expressed | D24 |
| s01108g26885 | 1,500 | 0,000 | (S)-N-methylcoclaurine 3'-hydroxylase isozyme 2                                        | (S)-N-methylcoclaurine 3'-hydroxylase isozyme 2 [Morus notabilis]                                               | Over Expressed | D24 |
| s01124g26988 | 1,496 | 0,013 | tubby-like protein 8                                                                   | PREDICTED: tubby-like protein 8 [Prunus mume]                                                                   | Over Expressed | D24 |
| s00944g25535 | 1,489 | 0,032 | -                                                                                      | ***** No hits found *****                                                                                       | Over Expressed | D24 |
| s01820g30040 | 1,487 | 0,014 | -                                                                                      | PREDICTED: protein NUCLEAR FUSION DEFECTIVE 4-like [Fragaria vesca subsp. vesca]                                | Over Expressed | D24 |
| s00014g02018 | 1,482 | 0,011 | -                                                                                      | PREDICTED: ABC transporter C family member 8-like [Prunus mume]                                                 | Over Expressed | D24 |

|              |       |       |                                                                         |                                                                                                            |                |     |
|--------------|-------|-------|-------------------------------------------------------------------------|------------------------------------------------------------------------------------------------------------|----------------|-----|
| s00006g01093 | 1,481 | 0,000 | glucose-6-phosphate 1-epimerase                                         | Putative glucose-6-phosphate 1-epimerase [Morus notabilis]                                                 | Over Expressed | D24 |
| s00897g25053 | 1,468 | 0,004 | -                                                                       | ***** No hits found *****                                                                                  | Over Expressed | D24 |
| s00896g25044 | 1,459 | 0,000 | ribonuclease J                                                          | Ribonuclease J [Morus notabilis] gi 587916461 gb EXC04124.1                                                | Over Expressed | D24 |
| s00008g01301 | 1,458 | 0,004 | 4-alpha-glucanotransferase                                              | 4-alpha-glucanotransferase [Morus notabilis]                                                               | Over Expressed | D24 |
| s00111g08760 | 1,454 | 0,017 | multidrug resistance protein                                            | Putative multidrug resistance protein [Morus notabilis]                                                    | Over Expressed | D24 |
| s06767g32224 | 1,446 | 0,004 | -                                                                       | ### Not characterized<br>###:hypothetical protein L484_024613 [Morus notabilis]                            | Over Expressed | D24 |
| s00112g08808 | 1,441 | 0,002 | uncharacterized protein LOC100240766                                    | ### Not characterized<br>###:PREDICTED: uncharacterized protein LOC100240766 [Vitis vinifera]              | Over Expressed | D24 |
| s00038g04301 | 1,425 | 0,006 | leucine-rich repeat receptor protein kinase EXS                         | Leucine-rich repeat receptor protein kinase EXS [Morus notabilis]                                          | Over Expressed | D24 |
| s03029g31139 | 1,420 | 0,005 | G-type lectin S-receptor-like serine/threonine-protein kinase At1g61500 | PREDICTED: G-type lectin S-receptor-like serine/threonine-protein kinase At1g61500 [Prunus mume]           | Over Expressed | D24 |
| s15592g34233 | 1,419 | 0,040 | -                                                                       | F-box/FBD/LRR-repeat protein [Morus notabilis]                                                             | Over Expressed | D24 |
| s00248g13814 | 1,415 | 0,008 | E3 ubiquitin-protein ligase MARCH1                                      | PREDICTED: E3 ubiquitin-protein ligase MARCH1 [Populus euphratica]                                         | Over Expressed | D24 |
| s00440g18488 | 1,406 | 0,001 | glycosyltransferase                                                     | putative glycosyltransferase [Morus notabilis]                                                             | Over Expressed | D24 |
| s00310g15542 | 1,400 | 0,005 | exonuclease 1                                                           | PREDICTED: exonuclease 1 [Pyrus x bretschneideri]                                                          | Over Expressed | D24 |
| s01966g30340 | 1,398 | 0,022 | -                                                                       | Receptor-like protein 12 [Morus notabilis]                                                                 | Over Expressed | D24 |
| s00361g16769 | 1,387 | 0,002 | G-type lectin S-receptor-like serine/threonine-protein kinase           | G-type lectin S-receptor-like serine/threonine-protein kinase [Morus notabilis] gi 587924278 gb EXC11583.1 | Over Expressed | D24 |
| s00052g05353 | 1,373 | 0,001 | transcription factor bHLH47                                             | PREDICTED: transcription factor bHLH47 [Prunus mume]                                                       | Over Expressed | D24 |
| s10596g33210 | 1,367 | 0,042 | -                                                                       | Transcription factor TGA7 [Morus notabilis]                                                                | Over Expressed | D24 |
| s00248g13837 | 1,364 | 0,000 | UDP-glycosyltransferase 76E2                                            | UDP-glycosyltransferase 76E2 [Morus notabilis]                                                             | Over Expressed | D24 |
| s00331g16057 | 1,363 | 0,003 | serine/threonine-protein kinase SAPK3 isoform 2                         | Serine/threonine-protein kinase SAPK3 isoform 2, partial [Theobroma cacao] gi 508776903 gb EOY24159.1      | Over Expressed | D24 |
| s00423g18151 | 1,358 | 0,002 | similar to L484_022081                                                  | ### Not characterized<br>###:hypothetical protein L484_022081 [Morus notabilis]                            | Over Expressed | D24 |



|              |       |       |                                                      |                                                                                                          |                |     |
|--------------|-------|-------|------------------------------------------------------|----------------------------------------------------------------------------------------------------------|----------------|-----|
| s00376g17141 | 1,347 | 0,041 | zinc finger protein CONSTANS-LIKE 5                  | Zinc finger protein CONSTANS-LIKE 5 [Morus notabilis]                                                    | Over Expressed | D24 |
| s00154g10696 | 1,339 | 0,029 | scarecrow-like protein 4                             | PREDICTED: scarecrow-like protein 4 [Jatropha curcas]                                                    | Over Expressed | D24 |
| s00009g01450 | 1,337 | 0,029 | -                                                    | ***** No hits found *****                                                                                | Over Expressed | D24 |
| s00183g11762 | 1,335 | 0,002 | -                                                    | PREDICTED: superoxide dismutase 1 copper chaperone-like [Camelina sativa]                                | Over Expressed | D24 |
| s01395g28577 | 1,334 | 0,028 | metal tolerance protein 10                           | Metal tolerance protein 10 [Morus notabilis]                                                             | Over Expressed | D24 |
| s01692g29697 | 1,332 | 0,002 | -                                                    | Retrovirus-related Pol polyprotein from transposon TNT 1-94 [Morus notabilis] gj 587900817 gb EXB89110.1 | Over Expressed | D24 |
| s00138g09977 | 1,329 | 0,002 | DEAD-box ATP-dependent RNA helicase 22               | DEAD-box ATP-dependent RNA helicase 22 [Morus notabilis]                                                 | Over Expressed | D24 |
| s00206g12556 | 1,327 | 0,029 | vacuolar amino acid transporter YPQ1                 | PREDICTED: probable vacuolar amino acid transporter YPQ1 [Prunus mume]                                   | Over Expressed | D24 |
| s00114g08945 | 1,326 | 0,048 | -                                                    | F-box [Gossypium arboreum]                                                                               | Over Expressed | D24 |
| s00090g07730 | 1,324 | 0,001 | vignain-like                                         | PREDICTED: vignain-like [Prunus mume]                                                                    | Over Expressed | D24 |
| s00157g10783 | 1,323 | 0,000 | -                                                    | ### Not characterized<br>###:hypothetical protein JCGZ_04599 [Jatropha curcas]                           | Over Expressed | D24 |
| s04644g31640 | 1,322 | 0,020 | similar to L484_024613                               | ### Not characterized<br>###:hypothetical protein L484_024613 [Morus notabilis]                          | Over Expressed | D24 |
| s00037g04222 | 1,320 | 0,035 | -                                                    | ***** No hits found *****                                                                                | Over Expressed | D24 |
| s01143g27128 | 1,307 | 0,002 | RNA polymerase sigma factor rpoD                     | RNA polymerase sigma factor rpoD [Morus notabilis]                                                       | Over Expressed | D24 |
| s00016g02290 | 1,305 | 0,047 | cytochrome P450 734A1                                | Cytochrome P450 734A1 [Morus notabilis] gj 587854862 gb EXB44887.1                                       | Over Expressed | D24 |
| s01251g27836 | 1,301 | 0,018 | -                                                    | ***** No hits found *****                                                                                | Over Expressed | D24 |
| s01749g29881 | 1,291 | 0,002 | purine permease 9                                    | PREDICTED: probable purine permease 9 [Prunus mume]                                                      | Over Expressed | D24 |
| s00278g14663 | 1,281 | 0,000 | nucleic acid-binding, OB-fold-like protein isoform 1 | Nucleic acid-binding, OB-fold-like protein isoform 1 [Theobroma cacao] gj 508775153 gb EOY22409.1        | Over Expressed | D24 |
| s00001g00034 | 1,275 | 0,037 | -                                                    | PREDICTED: nucleolin 2-like isoform X1 [Citrus sinensis]                                                 | Over Expressed | D24 |
| s00059g05902 | 1,270 | 0,000 | O-fucosyltransferase family protein                  | O-fucosyltransferase family protein [Theobroma cacao]                                                    | Over Expressed | D24 |
| s00207g12589 | 1,265 | 0,001 | boron transporter 1                                  | PREDICTED: boron transporter 1 [Cucumis melo]                                                            | Over Expressed | D24 |
| s00437g18426 | 1,258 | 0,042 | -                                                    | Cysteine-rich RLK (RECEPTOR-like protein kinase) 8 [Theobroma cacao] gj 508718075 gb EOY09972.1          | Over Expressed | D24 |

|              |       |       |                                                                 |                                                                                                              |                |     |
|--------------|-------|-------|-----------------------------------------------------------------|--------------------------------------------------------------------------------------------------------------|----------------|-----|
| s00045g04848 | 1,255 | 0,000 | mitochondrial transcription termination factor family protein   | Mitochondrial transcription termination factor family protein [Theobroma cacao] gi 508706657 gb EOX98553.1   | Over Expressed | D24 |
| s00167g11170 | 1,253 | 0,022 | RING-H2 zinc finger protein RHA4a                               | RING-H2 zinc finger protein RHA4a [Morus notabilis]                                                          | Over Expressed | D24 |
| s00621g21711 | 1,251 | 0,039 | scarecrow-like transcription factor PAT1                        | PREDICTED: scarecrow-like transcription factor PAT1 [Prunus mume]                                            | Over Expressed | D24 |
| s00014g02014 | 1,251 | 0,045 | ABC transporter C family member 8                               | ABC transporter C family member 8 [Morus notabilis]                                                          | Over Expressed | D24 |
| s01419g28694 | 1,245 | 0,002 | prostaglandin E synthase 2                                      | Prostaglandin E synthase 2 [Morus notabilis]                                                                 | Over Expressed | D24 |
| s01387g28550 | 1,236 | 0,001 | 1,4-alpha-glucan-branching enzyme                               | 1,4-alpha-glucan-branching enzyme [Morus notabilis]                                                          | Over Expressed | D24 |
| s00444g18584 | 1,210 | 0,031 | similar to L484_000375                                          | ### Not characterized<br>###:hypothetical protein L484_000375 [Morus notabilis]                              | Over Expressed | D24 |
| s00123g09352 | 1,207 | 0,013 | uncharacterized protein LOC103950761                            | ### Not characterized<br>###:PREDICTED: uncharacterized protein LOC103950761 [Pyrus x bretschneideri]        | Over Expressed | D24 |
| s00696g22715 | 1,202 | 0,000 | disease resistance protein RPM1-like                            | PREDICTED: disease resistance protein RPM1-like [Pyrus x bretschneideri]                                     | Over Expressed | D24 |
| s00137g09943 | 1,197 | 0,029 | chaperone protein ClpB 1                                        | Chaperone protein ClpB 1 [Morus notabilis]                                                                   | Over Expressed | D24 |
| s01012g26133 | 1,196 | 0,001 | -                                                               | ### Not characterized<br>###:PREDICTED: uncharacterized protein LOC102629445 [Citrus sinensis]               | Over Expressed | D24 |
| s00704g22801 | 1,195 | 0,021 | gamma-irradiation and mitomycin c induced 1, putative isoform 1 | Gamma-irradiation and mitomycin c induced 1, putative isoform 1 [Theobroma cacao] gi 508776308 gb EOY23564.1 | Over Expressed | D24 |
| s05000g31744 | 1,195 | 0,048 | -                                                               | ### Not characterized<br>###:hypothetical protein L484_012525 [Morus notabilis]                              | Over Expressed | D24 |
| s00114g08910 | 1,194 | 0,002 | regulator of Vps4 activity in the MVB pathway protein isoform 1 | Regulator of Vps4 activity in the MVB pathway protein isoform 1 [Theobroma cacao] gi 508698821 gb EOX90717.1 | Over Expressed | D24 |
| s01840g30080 | 1,192 | 0,015 | nuclear transport factor 2 family protein                       | Nuclear transport factor 2 family protein [Theobroma cacao]                                                  | Over Expressed | D24 |
| s00248g13812 | 1,190 | 0,042 | tubulin beta-1 chain                                            | Tubulin beta-1 chain [Morus notabilis] gi 587839844 gb EXB30492.1                                            | Over Expressed | D24 |
| s00698g22740 | 1,184 | 0,004 | zinc transporter 11                                             | Zinc transporter 11 [Morus notabilis] gi 587874120 gb EXB63273.1                                             | Over Expressed | D24 |
| s00090g07756 | 1,180 | 0,008 | two-component response regulator                                | Two-component response regulator [Morus notabilis]                                                           | Over Expressed | D24 |

|              |       |       |                                                                           |                                                                                                           |                |     |
|--------------|-------|-------|---------------------------------------------------------------------------|-----------------------------------------------------------------------------------------------------------|----------------|-----|
| s00288g14948 | 1,165 | 0,001 | -                                                                         | **** No hits found ****                                                                                   | Over Expressed | D24 |
| s00333g16102 | 1,157 | 0,000 | -                                                                         | **** No hits found ****                                                                                   | Over Expressed | D24 |
| s00145g10309 | 1,156 | 0,022 | similar to L484_025078                                                    | ### Not characterized<br>###:hypothetical protein<br>L484_025078 [Morus notabilis]                        | Over Expressed | D24 |
| s00017g02349 | 1,154 | 0,004 | tropinone reductase-like protein                                          | Tropinone reductase-like protein [Morus notabilis]                                                        | Over Expressed | D24 |
| s00047g05006 | 1,149 | 0,006 | RING fingerand CHY zinc finger domain-containing protein 1 isoform X1     | PREDICTED: RING fingerand CHY zinc finger domain-containing protein 1 isoform X1 [Pyrus x bretschneideri] | Over Expressed | D24 |
| s00911g25205 | 1,135 | 0,033 | transducin/WD40 repeat-like superfamily protein                           | Transducin/WD40 repeat-like superfamily protein, putative [Theobroma cacao] gij508780239 gb EOY27495.1    | Over Expressed | D24 |
| s00969g25764 | 1,135 | 0,027 | UPF0695 membrane protein                                                  | UPF0695 membrane protein [Morus notabilis]                                                                | Over Expressed | D24 |
| s00154g10681 | 1,133 | 0,000 | isoflavone reductase-like protein                                         | PREDICTED: isoflavone reductase-like protein [Glycine max]                                                | Over Expressed | D24 |
| s00051g05310 | 1,129 | 0,036 | -                                                                         | PREDICTED: protein DA1-related 2-like isoform X2 [Nicotiana tomentosiformis]                              | Over Expressed | D24 |
| s00183g11748 | 1,129 | 0,007 | cation/H(+) antiporter 15                                                 | Cation/H(+) antiporter 15 [Morus notabilis]                                                               | Over Expressed | D24 |
| s00184g11792 | 1,127 | 0,014 | -                                                                         | PREDICTED: LOW QUALITY PROTEIN: protein S-acyltransferase 18 [Prunus mume]                                | Over Expressed | D24 |
| s00003g00556 | 1,125 | 0,027 | arsenical pump-driving ATPase                                             | Putative arsenical pump-driving ATPase [Morus notabilis]                                                  | Over Expressed | D24 |
| s00293g15070 | 1,122 | 0,000 | senescence-associated family protein                                      | senescence-associated family protein [Populus trichocarpa]                                                | Over Expressed | D24 |
| s01409g28655 | 1,120 | 0,026 | DNA polymerase III polC-type                                              | DNA polymerase III polC-type [Morus notabilis]                                                            | Over Expressed | D24 |
| s00079g07115 | 1,116 | 0,047 | -                                                                         | **** No hits found ****                                                                                   | Over Expressed | D24 |
| s01293g28041 | 1,110 | 0,022 | -                                                                         | **** No hits found ****                                                                                   | Over Expressed | D24 |
| s00264g14303 | 1,103 | 0,008 | neurofilament heavy polypeptide-like                                      | PREDICTED: neurofilament heavy polypeptide-like [Jaculus jaculus]                                         | Over Expressed | D24 |
| s00092g07855 | 1,103 | 0,000 | chlorophyllase-2                                                          | Chlorophyllase-2 [Morus notabilis] gij587861296 gb EXB51153.1                                             | Over Expressed | D24 |
| s00010g01628 | 1,100 | 0,012 | LRR receptor-like serine/threonine-protein kinase HSL2                    | LRR receptor-like serine/threonine-protein kinase HSL2 [Morus notabilis] gij587916185 gb EXC03884.1       | Over Expressed | D24 |
| s00604g21431 | 1,098 | 0,021 | pentatricopeptide repeat-containing protein At1g62680, mitochondrial-like | PREDICTED: pentatricopeptide repeat-containing protein At1g62680, mitochondrial-like [Malus domestica]    | Over Expressed | D24 |
| s00120g09223 | 1,094 | 0,000 | methyltransferase C9orf114                                                | PREDICTED: putative methyltransferase C9orf114 [Vitis vinifera]                                           | Over Expressed | D24 |
| s00092g07854 | 1,092 | 0,000 | DNA-directed RNA polymerase III subunit RPC9                              | DNA-directed RNA polymerase III subunit RPC9 [Morus notabilis]                                            | Over Expressed | D24 |

|              |       |       |                                                                        |                                                                                                                     |                |     |
|--------------|-------|-------|------------------------------------------------------------------------|---------------------------------------------------------------------------------------------------------------------|----------------|-----|
| s00001g00054 | 1,088 | 0,005 | uncharacterized protein LOC102627405                                   | ### Not characterized<br>###:PREDICTED: uncharacterized protein LOC102627405 [Citrus sinensis]                      | Over Expressed | D24 |
| s00670g22389 | 1,086 | 0,000 | two-component response regulator                                       | Two-component response regulator [Morus notabilis]                                                                  | Over Expressed | D24 |
| s00749g23390 | 1,085 | 0,008 | pentatricopeptide repeat-containing protein At1g30610, chloroplastic   | PREDICTED: pentatricopeptide repeat-containing protein At1g30610, chloroplastic [Prunus mume]                       | Over Expressed | D24 |
| s00603g21421 | 1,085 | 0,000 | ATP-dependent zinc metalloprotease FtsH                                | ATP-dependent zinc metalloprotease FtsH [Morus notabilis]                                                           | Over Expressed | D24 |
| s00948g25580 | 1,080 | 0,012 | phosphoenolpyruvate carboxylase 2                                      | Phosphoenolpyruvate carboxylase 2 [Morus notabilis]                                                                 | Over Expressed | D24 |
| s00237g13551 | 1,079 | 0,019 | two-component response regulator-like protein                          | Two-component response regulator-like protein [Morus notabilis]                                                     | Over Expressed | D24 |
| s00331g16049 | 1,075 | 0,027 | methyltransferase TARBP1                                               | putative methyltransferase TARBP1 [Morus notabilis]                                                                 | Over Expressed | D24 |
| s00179g11613 | 1,074 | 0,000 | MATE efflux family protein 1-like                                      | PREDICTED: MATE efflux family protein 1-like [Prunus mume]                                                          | Over Expressed | D24 |
| s00079g07173 | 1,073 | 0,000 | sodium-dependent transporter yocS                                      | putative sodium-dependent transporter yocS [Morus notabilis]                                                        | Over Expressed | D24 |
| s00033g03917 | 1,066 | 0,007 | aspartate, glycine, lysineand serine-rich protein-like                 | PREDICTED: aspartate, glycine, lysineand serine-rich protein-like [Prunus mume]                                     | Over Expressed | D24 |
| s00063g06163 | 1,065 | 0,003 | IAA-amino acid hydrolase                                               | IAA-amino acid hydrolase [Morus notabilis]                                                                          | Over Expressed | D24 |
| s00978g25840 | 1,062 | 0,004 | -                                                                      | ***** No hits found *****                                                                                           | Over Expressed | D24 |
| s00786g23838 | 1,060 | 0,004 | subtilisin-like protease                                               | Subtilisin-like protease [Morus notabilis]                                                                          | Over Expressed | D24 |
| s00180g11623 | 1,060 | 0,007 | UDP-N-acetylmuramoyl-L-alanyl-D-glutamate--2, 6-diaminopimelate ligase | UDP-N-acetylmuramoyl-L-alanyl-D-glutamate--2, 6-diaminopimelate ligase [Morus notabilis] gi 587846902 gb EXB37342.1 | Over Expressed | D24 |
| s00147g10412 | 1,053 | 0,000 | glucan endo-1,3-beta-glucosidase 11                                    | Glucan endo-1,3-beta-glucosidase 11 [Morus notabilis]                                                               | Over Expressed | D24 |
| s00057g05768 | 1,051 | 0,000 | uncharacterized membrane protein                                       | Uncharacterized membrane protein [Morus notabilis]                                                                  | Over Expressed | D24 |
| s00092g07866 | 1,050 | 0,003 | -                                                                      | PREDICTED: protein tesmin/TSO1-like CXC 2 isoform X2 [Prunus mume]                                                  | Over Expressed | D24 |
| s00032g03841 | 1,048 | 0,020 | similar to L484_017966                                                 | ### Not characterized<br>###:hypothetical protein L484_017966 [Morus notabilis]                                     | Over Expressed | D24 |
| s01251g27834 | 1,046 | 0,000 | -                                                                      | ***** No hits found *****                                                                                           | Over Expressed | D24 |

|              |       |       |                                                                      |                                                                                                           |                |     |
|--------------|-------|-------|----------------------------------------------------------------------|-----------------------------------------------------------------------------------------------------------|----------------|-----|
| s00051g05309 | 1,044 | 0,049 | -                                                                    | PREDICTED: protein DA1-related 2-like [Pyrus x bretschneideri]                                            | Over Expressed | D24 |
| s01287g28012 | 1,043 | 0,000 | aldehyde dehydrogenase family 2 member C4                            | Aldehyde dehydrogenase family 2 member C4 [Morus notabilis]                                               | Over Expressed | D24 |
| s08562g32722 | 1,038 | 0,012 | -                                                                    | Putative quinone-oxidoreductase-like protein [Morus notabilis]                                            | Over Expressed | D24 |
| s01021g26203 | 1,035 | 0,001 | histidinol-phosphate aminotransferase                                | Histidinol-phosphate aminotransferase [Morus notabilis]                                                   | Over Expressed | D24 |
| s01003g26059 | 1,034 | 0,047 | cysteine-rich RLK (RECEPTOR-like protein kinase) 8                   | Cysteine-rich RLK (RECEPTOR-like protein kinase) 8 [Theobroma cacao]                                      | Over Expressed | D24 |
| s17598g34608 | 1,033 | 0,046 | -                                                                    | Alliin lyase precursor, putative [Ricinus communis]                                                       | Over Expressed | D24 |
| s01998g30387 | 1,029 | 0,005 | RNA helicase SDE3                                                    | PREDICTED: probable RNA helicase SDE3 [Populus euphratica]                                                | Over Expressed | D24 |
| s00745g23345 | 1,026 | 0,036 | flowering locus T family protein                                     | flowering locus T family protein [Populus trichocarpa]                                                    | Over Expressed | D24 |
| s00204g12512 | 1,025 | 0,040 | similar to L484_000425                                               | ### Not characterized<br>###:hypothetical protein L484_000425 [Morus notabilis]                           | Over Expressed | D24 |
| s00052g05364 | 1,024 | 0,028 | pentatricopeptide repeat-containing protein At1g74600, chloroplastic | PREDICTED: pentatricopeptide repeat-containing protein At1g74600, chloroplastic [Prunus mume]             | Over Expressed | D24 |
| s00407g17827 | 1,023 | 0,000 | -                                                                    | PREDICTED: protein TRANSPARENT TESTA 12-like [Gossypium raimondii]                                        | Over Expressed | D24 |
| s00040g04423 | 1,023 | 0,016 | -                                                                    | ***** No hits found *****                                                                                 | Over Expressed | D24 |
| s01229g27711 | 1,015 | 0,018 | -                                                                    | PREDICTED: pentatricopeptide repeat-containing protein At1g62720-like [Pyrus x bretschneideri]            | Over Expressed | D24 |
| s00661g22285 | 1,014 | 0,000 | anthocyanidin 5,3-O-glucosyltransferase                              | Anthocyanidin 5,3-O-glucosyltransferase [Morus notabilis]                                                 | Over Expressed | D24 |
| s00242g13683 | 1,014 | 0,033 | pentatricopeptide repeat-containing protein At4g39952, mitochondrial | PREDICTED: pentatricopeptide repeat-containing protein At4g39952, mitochondrial [Prunus mume]             | Over Expressed | D24 |
| s01107g26873 | 1,014 | 0,003 | pentatricopeptide repeat-containing protein At5g08305                | PREDICTED: pentatricopeptide repeat-containing protein At5g08305 [Prunus mume]                            | Over Expressed | D24 |
| s00312g15573 | 1,014 | 0,008 | 1-aminocyclopropane-1-carboxylate oxidase homolog 1-like             | PREDICTED: 1-aminocyclopropane-1-carboxylate oxidase homolog 1-like [Nicotiana tomentosiformis]           | Over Expressed | D24 |
| s00333g16101 | 1,013 | 0,008 | chloroplastic group IIA intron splicing facilitator CRS1             | Chloroplastic group IIA intron splicing facilitator CRS1 [Morus notabilis]<br>gij 587933540 gb EXC20503.1 | Over Expressed | D24 |

|              |        |       |                                                   |                                                                                                               |                 |     |
|--------------|--------|-------|---------------------------------------------------|---------------------------------------------------------------------------------------------------------------|-----------------|-----|
| s00033g03906 | 1,010  | 0,024 | inactive rhomboid protein 1                       | Inactive rhomboid protein 1 [Morus notabilis]                                                                 | Over Expressed  | D24 |
| s01478g28934 | 1,009  | 0,030 | TBC1 domain family member 13                      | TBC1 domain family member 13 [Morus notabilis]                                                                | Over Expressed  | D24 |
| s00040g04432 | 1,007  | 0,005 | 4Fe-4S ferredoxin, iron-sulfur binding isoform 1  | 4Fe-4S ferredoxin, iron-sulfur binding isoform 1 [Theobroma cacao]                                            | Over Expressed  | D24 |
| s00141g10091 | 1,006  | 0,035 | pleiotropic drug resistance protein 2             | Pleiotropic drug resistance protein 2 [Morus notabilis]                                                       | Over Expressed  | D24 |
| s00006g01040 | 1,004  | 0,000 | shaggy-related protein kinase epsilon             | Shaggy-related protein kinase epsilon [Morus notabilis]                                                       | Over Expressed  | D24 |
| s00733g23191 | 1,004  | 0,001 | similar to L484_016704                            | ### Not characterized<br>###:hypothetical protein<br>L484_016704 [Morus notabilis]                            | Over Expressed  | D24 |
| s03164g31182 | -7,573 | 0,000 | LRR receptor-like serine/threonine-protein kinase | putative LRR receptor-like serine/threonine-protein kinase [Morus notabilis]<br>gij587885757 gb EXB74614.1    | Under Expressed | D24 |
| s00896g25043 | -7,544 | 0,004 | calcium-binding protein CML37                     | Calcium-binding protein CML37 [Morus notabilis]                                                               | Under Expressed | D24 |
| s00038g04282 | -7,437 | 0,000 | 21 kDa protein                                    | 21 kDa protein [Morus notabilis]<br>gij587951022 gb EXC36884.1  21 kDa protein [Morus notabilis]              | Under Expressed | D24 |
| s00172g11376 | -7,128 | 0,046 | N-acetyltransferase p20                           | putative N-acetyltransferase p20 [Morus notabilis]                                                            | Under Expressed | D24 |
| s00069g06538 | -7,121 | 0,004 | -                                                 | wound-induced protein precursor [Glycine max]                                                                 | Under Expressed | D24 |
| s01095g26791 | -6,670 | 0,008 | GDSL esterase/lipase                              | GDSL esterase/lipase [Morus notabilis]<br>gij587868944 gb EXB58276.1                                          | Under Expressed | D24 |
| s00006g01076 | -6,572 | 0,009 | -                                                 | ***** No hits found *****                                                                                     | Under Expressed | D24 |
| s00051g05321 | -6,530 | 0,039 | -                                                 | G-type lectin S-receptor-like serine/threonine-protein kinase [Morus notabilis]<br>gij587837766 gb EXB28514.1 | Under Expressed | D24 |
| s00031g03733 | -6,347 | 0,017 | -                                                 | ***** No hits found *****                                                                                     | Under Expressed | D24 |
| s00035g04111 | -6,285 | 0,031 | -                                                 | 3-isopropylmalate dehydratase large subunit [Gossypium arboreum]                                              | Under Expressed | D24 |
| s00173g11396 | -6,285 | 0,002 | endochitinase                                     | Endochitinase [Morus notabilis]<br>gij587865661 gb EXB55191.1                                                 | Under Expressed | D24 |
| s00527g20166 | -6,191 | 0,039 | homeobox-leucine zipper protein ATHB-21           | Homeobox-leucine zipper protein ATHB-21 [Morus notabilis]                                                     | Under Expressed | D24 |
| s00008g01366 | -6,185 | 0,026 | ethylene-responsive transcription factor          | Ethylene-responsive transcription factor [Morus notabilis]                                                    | Under Expressed | D24 |
| s00344g16347 | -6,170 | 0,008 | -                                                 | ***** No hits found *****                                                                                     | Under Expressed | D24 |
| s00634g21885 | -6,140 | 0,035 | -                                                 | PREDICTED: proline-rich protein 4-like [Vigna radiata var. radiata]                                           | Under Expressed | D24 |

|              |        |       |                                                   |                                                                                                           |                 |     |
|--------------|--------|-------|---------------------------------------------------|-----------------------------------------------------------------------------------------------------------|-----------------|-----|
| s00288g14928 | -6,011 | 0,039 | flowering promoting factor 1                      | Flowering promoting factor 1 [Theobroma cacao]                                                            | Under Expressed | D24 |
| s01500g29040 | -5,999 | 0,000 | -                                                 | PREDICTED: calcium-binding protein CML39-like [Gossypium raimondii]                                       | Under Expressed | D24 |
| s00096g08052 | -5,963 | 0,019 | -                                                 | putative receptor-like protein kinase [Morus notabilis]                                                   | Under Expressed | D24 |
| s00116g09037 | -5,963 | 0,018 | -                                                 | PREDICTED: protein IDA [Prunus mume]                                                                      | Under Expressed | D24 |
| s01300g28071 | -5,952 | 0,035 | -                                                 | Cysteine-rich RLK (RECEPTOR-like protein kinase) 8 [Theobroma cacao] gij508724766[gb][EOY16663.1]         | Under Expressed | D24 |
| s00014g02101 | -5,624 | 0,038 | anthocyanin regulatory C1 protein                 | Anthocyanin regulatory C1 protein [Morus notabilis]                                                       | Under Expressed | D24 |
| s01834g30071 | -5,552 | 0,001 | LRR receptor-like serine/threonine-protein kinase | putative LRR receptor-like serine/threonine-protein kinase [Morus notabilis] gij587885756[gb][EXB74613.1] | Under Expressed | D24 |
| s00164g11047 | -5,496 | 0,025 | chalcone synthase                                 | Chalcone synthase [Morus notabilis] gij587888218[gb][EXB76929.1]                                          | Under Expressed | D24 |
| s00653g22150 | -5,477 | 0,023 | BON1-associated protein 2                         | BON1-associated protein 2 [Morus notabilis]                                                               | Under Expressed | D24 |
| s01494g29013 | -5,191 | 0,015 | -                                                 | PREDICTED: transcription factor PAR1-like [Gossypium raimondii]                                           | Under Expressed | D24 |
| s00470g19104 | -5,149 | 0,000 | -                                                 | Calcium-binding EF-hand family protein, putative [Theobroma cacao]                                        | Under Expressed | D24 |
| s00074g06836 | -5,107 | 0,016 | -                                                 | PREDICTED: B3 domain-containing transcription factor NGA4-like [Populus euphratica]                       | Under Expressed | D24 |
| s00004g00728 | -5,099 | 0,015 | -                                                 | ***** No hits found *****                                                                                 | Under Expressed | D24 |
| s03966g31442 | -5,092 | 0,009 | -                                                 | ***** No hits found *****                                                                                 | Under Expressed | D24 |
| s15689g34250 | -5,090 | 0,009 | -                                                 | gag/pol protein [Bryonia dioica]                                                                          | Under Expressed | D24 |
| s00032g03857 | -5,089 | 0,007 | RING-H2 finger protein ATL3                       | RING-H2 finger protein ATL3 [Morus notabilis]                                                             | Under Expressed | D24 |
| s01042g26401 | -5,022 | 0,018 | similar to L484_011611                            | ### Not characterized ###:hypothetical protein L484_011611 [Morus notabilis]                              | Under Expressed | D24 |
| s00303g15320 | -4,997 | 0,026 | sex determination protein tasselseed-2            | Sex determination protein tasselseed-2 [Morus notabilis]                                                  | Under Expressed | D24 |
| s00244g13737 | -4,959 | 0,029 | Cl small heat shock protein 2                     | Cl small heat shock protein 2 [Prunus salicina]                                                           | Under Expressed | D24 |
| s01804g30004 | -4,876 | 0,012 | ethylene-responsive transcription factor 1B       | Ethylene-responsive transcription factor 1B [Morus notabilis]                                             | Under Expressed | D24 |
| s00173g11403 | -4,828 | 0,006 | -                                                 | ### Not characterized ###:Uncharacterized protein TCM_019918 [Theobroma cacao]                            | Under Expressed | D24 |

|              |        |       |                                                                     |                                                                                                             |                 |     |
|--------------|--------|-------|---------------------------------------------------------------------|-------------------------------------------------------------------------------------------------------------|-----------------|-----|
| s00041g04548 | -4,808 | 0,000 | -                                                                   | Coatmer subunit beta'-3 [Morus notabilis]                                                                   | Under Expressed | D24 |
| s00035g04069 | -4,807 | 0,026 | late embryogenesis abundant hydroxyproline-rich glycoprotein family | Late embryogenesis abundant hydroxyproline-rich glycoprotein family, putative [Theobroma cacao]             | Under Expressed | D24 |
| s00031g03735 | -4,781 | 0,024 | -                                                                   | **** No hits found ****                                                                                     | Under Expressed | D24 |
| s00232g13385 | -4,693 | 0,023 | -                                                                   | ### Not characterized<br>###:hypothetical protein L484_005249 [Morus notabilis]                             | Under Expressed | D24 |
| s00458g18863 | -4,683 | 0,037 | (RS)-norcoclaurine 6-O-methyltransferase                            | (RS)-norcoclaurine 6-O-methyltransferase [Morus notabilis]                                                  | Under Expressed | D24 |
| s01060g26543 | -4,665 | 0,033 | -                                                                   | calciumion binding protein, putative [Ricinus communis]                                                     | Under Expressed | D24 |
| s00123g09309 | -4,635 | 0,037 | tabersonine 16-O-methyltransferase                                  | Tabersonine 16-O-methyltransferase [Morus notabilis]                                                        | Under Expressed | D24 |
| s00147g10417 | -4,570 | 0,009 | -                                                                   | ### Not characterized<br>###:hypothetical protein L484_024119 [Morus notabilis]                             | Under Expressed | D24 |
| s01171g27344 | -4,560 | 0,013 | -                                                                   | ### Not characterized<br>###:hypothetical protein L484_018218 [Morus notabilis]                             | Under Expressed | D24 |
| s00299g15226 | -4,546 | 0,016 | WRKY transcription factor 18                                        | WRKY transcription factor 18 [Morus notabilis]                                                              | Under Expressed | D24 |
| s00303g15319 | -4,532 | 0,000 | wound-induced protein 1                                             | PREDICTED: wound-induced protein 1 [Fragaria vesca subsp. vesca]                                            | Under Expressed | D24 |
| s00076g06935 | -4,526 | 0,000 | pathogenesis-related protein transcriptional activator PTI6         | Pathogenesis-related protein transcriptional activator PTI6 [Morus notabilis]<br>gij587866561 gb EXB56018.1 | Under Expressed | D24 |
| s00148g10443 | -4,497 | 0,002 | stachyose synthase-like                                             | PREDICTED: stachyose synthase-like [Prunus mume]                                                            | Under Expressed | D24 |
| s00312g15580 | -4,485 | 0,047 | -                                                                   | PREDICTED: ethylene-responsive transcription factor ERF096-like [Pyrus x bretschneideri]                    | Under Expressed | D24 |
| s00069g06537 | -4,485 | 0,032 | wound-induced protein WIN2                                          | Wound-induced protein WIN2 [Morus notabilis]                                                                | Under Expressed | D24 |
| s00006g01088 | -4,455 | 0,004 | cytochrome P450 86B1-like                                           | PREDICTED: cytochrome P450 86B1-like [Populus euphratica]                                                   | Under Expressed | D24 |
| s00004g00684 | -4,394 | 0,000 | galactose oxidase                                                   | galactose oxidase [Ziziphus jujuba]                                                                         | Under Expressed | D24 |
| s00008g01340 | -4,391 | 0,040 | -                                                                   | putative WRKY transcription factor 51 [Morus notabilis]                                                     | Under Expressed | D24 |
| s00644g22030 | -4,338 | 0,023 | -                                                                   | Glycolipid transfer domain-containing protein 1 [Gossypium arboreum]                                        | Under Expressed | D24 |



|              |        |       |                                                                |                                                                                                   |                 |     |
|--------------|--------|-------|----------------------------------------------------------------|---------------------------------------------------------------------------------------------------|-----------------|-----|
| s00458g18864 | -4,326 | 0,000 | -                                                              | (RS)-norcoclaurine 6-O-methyltransferase [Morus notabilis]                                        | Under Expressed | D24 |
| s00004g00779 | -4,266 | 0,000 | dnaJ homolog subfamily C member 1                              | DnaJ homolog subfamily C member 1 [Morus notabilis]                                               | Under Expressed | D24 |
| s00172g11377 | -4,131 | 0,030 | N-acetyltransferase p20                                        | putative N-acetyltransferase p20 [Morus notabilis]                                                | Under Expressed | D24 |
| s00185g11839 | -4,130 | 0,028 | metacaspase-1-like                                             | PREDICTED: metacaspase-1-like [Jatropha curcas]                                                   | Under Expressed | D24 |
| s00192g12067 | -4,121 | 0,000 | aspartic proteinase nepenthesin-1                              | Aspartic proteinase nepenthesin-1 [Morus notabilis]                                               | Under Expressed | D24 |
| s00068g06436 | -4,070 | 0,045 | E3 ubiquitin-protein ligase RGLG2                              | E3 ubiquitin-protein ligase RGLG2 [Morus notabilis]                                               | Under Expressed | D24 |
| s00001g00155 | -4,066 | 0,049 | -                                                              | ### Not characterized<br>###:hypothetical protein L484_012747 [Morus notabilis]                   | Under Expressed | D24 |
| s00181g11661 | -4,048 | 0,030 | serine acetyltransferase 3, mitochondrial                      | Serine acetyltransferase 3, mitochondrial, putative [Theobroma cacao] gi 508781685 gb EOY28941.1] | Under Expressed | D24 |
| s00039g04387 | -4,030 | 0,000 | similar to L484_000104                                         | ### Not characterized<br>###:hypothetical protein L484_000104 [Morus notabilis]                   | Under Expressed | D24 |
| s00040g04463 | -3,999 | 0,000 | -                                                              | GAST-like gene product family protein [Populus trichocarpa]                                       | Under Expressed | D24 |
| s00256g14080 | -3,970 | 0,015 | heat stress transcription factor A-2c                          | Heat stress transcription factor A-2c, putative [Theobroma cacao]                                 | Under Expressed | D24 |
| s00322g15868 | -3,966 | 0,026 | thaumatin-like protein 1                                       | PREDICTED: thaumatin-like protein 1 [Cicer arietinum]                                             | Under Expressed | D24 |
| s01243g27793 | -3,960 | 0,043 | wall-associated receptor kinase-like 9                         | Wall-associated receptor kinase-like 9 [Morus notabilis]                                          | Under Expressed | D24 |
| s00055g05566 | -3,940 | 0,006 | -                                                              | PREDICTED: LOW QUALITY PROTEIN: protein PLANT CADMIUM RESISTANCE 8 [Vigna radiata var. radiata]   | Under Expressed | D24 |
| s02226g30702 | -3,932 | 0,048 | transcription factor bHLH100-like                              | PREDICTED: transcription factor bHLH100-like [Fragaria vesca subsp. vesca]                        | Under Expressed | D24 |
| s00033g03927 | -3,932 | 0,002 | phosphatidylcholine:diacylglycerol cholinephosphotransferase 1 | PREDICTED: phosphatidylcholine:diacylglycerol cholinephosphotransferase 1 [Glycine max]           | Under Expressed | D24 |
| s01500g29037 | -3,931 | 0,007 | -                                                              | putative calcium-binding protein CML10 [Morus notabilis]                                          | Under Expressed | D24 |
| s00614g21595 | -3,919 | 0,044 | auxin-induced protein 5NG4                                     | Auxin-induced protein 5NG4 [Morus notabilis]                                                      | Under Expressed | D24 |

|              |        |       |                                                     |                                                                                                             |                 |     |
|--------------|--------|-------|-----------------------------------------------------|-------------------------------------------------------------------------------------------------------------|-----------------|-----|
| s18275g34741 | -3,891 | 0,038 | pentatricopeptide repeat-containing protein         | Pentatricopeptide repeat-containing protein [Morus notabilis]                                               | Under Expressed | D24 |
| s00218g12961 | -3,873 | 0,012 | -                                                   | PREDICTED: sigma factor binding protein 1, chloroplastic-like [Populus euphratica]                          | Under Expressed | D24 |
| s00581g21074 | -3,845 | 0,017 | -                                                   | ***** No hits found *****                                                                                   | Under Expressed | D24 |
| s00101g08292 | -3,841 | 0,004 | ethylene-responsive transcription factor 2          | Ethylene-responsive transcription factor 2 [Morus notabilis]                                                | Under Expressed | D24 |
| s00977g25835 | -3,837 | 0,043 | -                                                   | putative LRR receptor-like serine/threonine-protein kinase [Morus notabilis] gij 587885757 gb EXB74614.1    | Under Expressed | D24 |
| s00608g21507 | -3,826 | 0,013 | lactosylceramide 4-alpha-galactosyltransferase-like | PREDICTED: lactosylceramide 4-alpha-galactosyltransferase-like [Fragaria vesca subsp. vesca]                | Under Expressed | D24 |
| s00022g02980 | -3,773 | 0,022 | -                                                   | ### Not characterized ###:hypothetical protein L484_024544 [Morus notabilis]                                | Under Expressed | D24 |
| s00863g24669 | -3,771 | 0,028 | -                                                   | ### Not characterized ###:hypothetical protein L484_000041 [Morus notabilis]                                | Under Expressed | D24 |
| s00356g16649 | -3,765 | 0,005 | -                                                   | G-type lectin S-receptor-like serine/threonine-protein kinase [Morus notabilis] gij 587865878 gb EXB55394.1 | Under Expressed | D24 |
| s00034g03977 | -3,746 | 0,016 | -                                                   | ***** No hits found *****                                                                                   | Under Expressed | D24 |
| s00017g02383 | -3,743 | 0,035 | scarecrow-like protein 30                           | PREDICTED: scarecrow-like protein 30 [Gossypium raimondii]                                                  | Under Expressed | D24 |
| s00028g03434 | -3,730 | 0,004 | proteasome subunit beta type-3-A                    | Proteasome subunit beta type-3-A [Morus notabilis]                                                          | Under Expressed | D24 |
| s00112g08820 | -3,715 | 0,015 | RING-H2 finger protein ATL2                         | RING-H2 finger protein ATL2 [Morus notabilis]                                                               | Under Expressed | D24 |
| s00298g15169 | -3,692 | 0,048 | anthocyanin regulatory C1 protein                   | Anthocyanin regulatory C1 protein [Morus notabilis]                                                         | Under Expressed | D24 |
| s00116g09020 | -3,691 | 0,000 | -                                                   | leucoanthocyanidin reductase [Humulus lupulus]                                                              | Under Expressed | D24 |
| s06315g32096 | -3,681 | 0,001 | (RS)-norcochlorine 6-O-methyltransferase            | (RS)-norcochlorine 6-O-methyltransferase [Morus notabilis]                                                  | Under Expressed | D24 |
| s00062g06063 | -3,666 | 0,031 | serine/threonine-protein kinase                     | Serine/threonine-protein kinase [Morus notabilis]                                                           | Under Expressed | D24 |
| s00574g20968 | -3,655 | 0,021 | -                                                   | PREDICTED: glycine-rich cell wall structural protein 1-like [Populus euphratica]                            | Under Expressed | D24 |
| s00129g09589 | -3,621 | 0,022 | similar to L484_026553                              | ### Not characterized ###:hypothetical protein L484_026553 [Morus notabilis]                                | Under Expressed | D24 |
| s00138g09998 | -3,609 | 0,023 | formin-like protein 8                               | Formin-like protein 8 [Morus notabilis] gij 587894133 gb EXB82665.1                                         | Under Expressed | D24 |

|              |        |       |                                                               |                                                                                                            |                 |     |
|--------------|--------|-------|---------------------------------------------------------------|------------------------------------------------------------------------------------------------------------|-----------------|-----|
| s00037g04216 | -3,606 | 0,029 | peroxidase 51-like                                            | PREDICTED: peroxidase 51-like [Gossypium raimondii]                                                        | Under Expressed | D24 |
| s00823g24268 | -3,605 | 0,022 | receptor-like protein kinase                                  | putative receptor-like protein kinase [Morus notabilis]                                                    | Under Expressed | D24 |
| s00356g16650 | -3,598 | 0,013 | G-type lectin S-receptor-like serine/threonine-protein kinase | G-type lectin S-receptor-like serine/threonine-protein kinase [Morus notabilis] gj 587865878 gb EXB55394.1 | Under Expressed | D24 |
| s01296g28050 | -3,591 | 0,005 | auxin-induced protein 5NG4                                    | Auxin-induced protein 5NG4 [Morus notabilis]                                                               | Under Expressed | D24 |
| s00297g15152 | -3,559 | 0,042 | -                                                             | putative S-adenosylmethionine-dependent methyltransferase [Morus notabilis] gj 587935268 gb EXC22151.1     | Under Expressed | D24 |
| s00116g09014 | -3,553 | 0,000 | AP2/ERF and B3 domain-containing transcription factor RAV1    | AP2/ERF and B3 domain-containing transcription factor RAV1 [Morus notabilis] gj 587864332 gb EXB53997.1    | Under Expressed | D24 |
| s00111g08794 | -3,550 | 0,033 | RING/U-box superfamily protein, putative isoform 1            | RING/U-box superfamily protein, putative isoform 1 [Theobroma cacao] gj 590643833 ref XP_007030912.1       | Under Expressed | D24 |
| s03907g31418 | -3,546 | 0,005 | -                                                             | ***** No hits found *****                                                                                  | Under Expressed | D24 |
| s08835g32784 | -3,526 | 0,047 | wall-associated receptor kinase 2-like                        | PREDICTED: wall-associated receptor kinase 2-like [Malus domestica]                                        | Under Expressed | D24 |
| s01087g26736 | -3,525 | 0,019 | -                                                             | ### Not characterized<br>###:hypothetical protein L484_021517 [Morus notabilis]                            | Under Expressed | D24 |
| s00634g21887 | -3,519 | 0,001 | BAHD acyltransferase DCR                                      | BAHD acyltransferase DCR [Morus notabilis]                                                                 | Under Expressed | D24 |
| s00862g24651 | -3,479 | 0,001 | -                                                             | ### Not characterized<br>###:hypothetical protein L484_023020 [Morus notabilis]                            | Under Expressed | D24 |
| s00082g07325 | -3,477 | 0,000 | RING finger and CHY zinc finger domain-containing protein 1   | RING fingerand CHY zinc finger domain-containing protein 1 [Morus notabilis] gj 587887097 gb EXB75898.1    | Under Expressed | D24 |
| s01514g29100 | -3,463 | 0,033 | -                                                             | PREDICTED: glutelin type-A 1-like [Nelumbo nucifera]                                                       | Under Expressed | D24 |
| s00069g06516 | -3,461 | 0,003 | beta-galactosidase                                            | beta-galactosidase [Prunus salicina]                                                                       | Under Expressed | D24 |
| s00137g09948 | -3,450 | 0,034 | serine/threonine-protein kinase-like protein                  | Putative serine/threonine-protein kinase-like protein [Morus notabilis] gj 587900038 gb EXB88391.1         | Under Expressed | D24 |
| s00594g21274 | -3,433 | 0,004 | 10-deacetylbaaccatin III 10-O-acetyltransferase               | 10-deacetylbaaccatin III 10-O-acetyltransferase [Morus notabilis]                                          | Under Expressed | D24 |
| s00123g09330 | -3,424 | 0,026 | zinc finger protein ZAT10                                     | PREDICTED: zinc finger protein ZAT10 [Populus euphratica]                                                  | Under Expressed | D24 |
| s07127g32320 | -3,396 | 0,033 | heat shock cognate 70 kDa protein 2-like                      | PREDICTED: LOW QUALITY PROTEIN: heat shock cognate 70 kDa protein 2-like [Jatropha curcas]                 | Under Expressed | D24 |
| s00581g21073 | -3,387 | 0,015 | -                                                             | ### Not characterized<br>###:hypothetical protein L484_013065 [Morus notabilis]                            | Under Expressed | D24 |

|              |        |       |                                                                         |                                                                                                             |                 |     |
|--------------|--------|-------|-------------------------------------------------------------------------|-------------------------------------------------------------------------------------------------------------|-----------------|-----|
| s02234g30709 | -3,371 | 0,024 | ankyrin repeat family protein                                           | Ankyrin repeat family protein [Theobroma cacao]                                                             | Under Expressed | D24 |
| s00289g14954 | -3,368 | 0,039 | pathogenesis-related protein transcriptional activator PTI5             | Pathogenesis-related protein transcriptional activator PTI5 [Morus notabilis] gij587945628[gb]EXC32022.1    | Under Expressed | D24 |
| s00001g00002 | -3,368 | 0,023 | -                                                                       | ### Not characterized<br>###:hypothetical protein L484_013383 [Morus notabilis]                             | Under Expressed | D24 |
| s00138g09990 | -3,363 | 0,031 | metalloendoproteinase 1                                                 | Metalloendoproteinase 1 [Morus notabilis]                                                                   | Under Expressed | D24 |
| s01171g27343 | -3,344 | 0,030 | nudix hydrolase 2                                                       | Nudix hydrolase 2 [Morus notabilis] gij587845513[gb]EXB36060.1                                              | Under Expressed | D24 |
| s00034g03978 | -3,335 | 0,026 | WRKY transcription factor 40                                            | putative WRKY transcription factor 40 [Morus notabilis]                                                     | Under Expressed | D24 |
| s00030g03656 | -3,317 | 0,024 | calcium-transporting ATPase 2, plasma membrane-type                     | Calcium-transporting ATPase 2, plasma membrane-type [Morus notabilis]                                       | Under Expressed | D24 |
| s00531g20245 | -3,298 | 0,001 | thaumatin-like protein isoform 2                                        | thaumatin-like protein isoform 2 [Ficus pumila var. awkeotsang]                                             | Under Expressed | D24 |
| s00077g07029 | -3,296 | 0,034 | WRKY transcription factor 70                                            | putative WRKY transcription factor 70 [Morus notabilis]                                                     | Under Expressed | D24 |
| s00101g08300 | -3,286 | 0,025 | ethylene-responsive transcription factor 6                              | Ethylene-responsive transcription factor 6 [Morus notabilis]                                                | Under Expressed | D24 |
| s00078g07106 | -3,285 | 0,015 | NAC domain-containing protein 2                                         | NAC domain-containing protein 2 [Morus notabilis]                                                           | Under Expressed | D24 |
| s00628g21792 | -3,276 | 0,024 | zingipain-2-like                                                        | PREDICTED: zingipain-2-like [Gossypium raimondii]                                                           | Under Expressed | D24 |
| s00040g04475 | -3,274 | 0,000 | chaperone protein dnaJ 11                                               | Chaperone protein dnaJ 11 [Morus notabilis]                                                                 | Under Expressed | D24 |
| s01841g30084 | -3,273 | 0,039 | G-type lectin S-receptor-like serine/threonine-protein kinase At2g19130 | PREDICTED: G-type lectin S-receptor-like serine/threonine-protein kinase At2g19130 [Pyrus x bretschneideri] | Under Expressed | D24 |
| s11294g33374 | -3,247 | 0,035 | -                                                                       | PREDICTED: inositol phosphorylceramide glucuronosyltransferase 1-like [Vigna radiata var. radiata]          | Under Expressed | D24 |
| s00234g13451 | -3,227 | 0,026 | -                                                                       | PREDICTED: transcription factor bHLH137-like [Prunus mume]                                                  | Under Expressed | D24 |
| s00003g00481 | -3,212 | 0,000 | sugar transporter ERD6-like 5                                           | Sugar transporter ERD6-like 5 [Morus notabilis]                                                             | Under Expressed | D24 |
| s00376g17144 | -3,205 | 0,043 | GDSL esterase/lipase                                                    | GDSL esterase/lipase [Morus notabilis] gij587895731[gb]EXB84225.1                                           | Under Expressed | D24 |
| s04517g31607 | -3,189 | 0,030 | -                                                                       | ***** No hits found *****                                                                                   | Under Expressed | D24 |
| s00014g02127 | -3,186 | 0,027 | cytochrome P450 71A1                                                    | Cytochrome P450 71A1 [Morus notabilis] gij587832975[gb]EXB23806.1                                           | Under Expressed | D24 |

|              |        |       |                                                       |                                                                                                         |                 |     |
|--------------|--------|-------|-------------------------------------------------------|---------------------------------------------------------------------------------------------------------|-----------------|-----|
| s00031g03717 | -3,186 | 0,043 | -                                                     | putative calcium-binding protein CML45 [Morus notabilis]                                                | Under Expressed | D24 |
| s00252g13943 | -3,142 | 0,047 | CBS domain-containing protein CBSX1                   | CBS domain-containing protein CBSX1 [Morus notabilis]                                                   | Under Expressed | D24 |
| s00232g13386 | -3,142 | 0,030 | -                                                     | ### Not characterized<br>###:hypothetical protein L484_005247 [Morus notabilis]                         | Under Expressed | D24 |
| s13015g33743 | -3,135 | 0,037 | LRR receptor-like serine/threonine-protein kinase     | putative LRR receptor-like serine/threonine-protein kinase [Morus notabilis] gij587885757 gb EXB74614.1 | Under Expressed | D24 |
| s00053g05397 | -3,126 | 0,038 | E3 ubiquitin-protein ligase LIN-1                     | Putative E3 ubiquitin-protein ligase LIN-1 [Morus notabilis]                                            | Under Expressed | D24 |
| s00143g10196 | -3,103 | 0,008 | similar to L484_010790                                | ### Not characterized<br>###:hypothetical protein L484_010790 [Morus notabilis]                         | Under Expressed | D24 |
| s00567g20827 | -3,097 | 0,048 | mitochondrial chaperone bcs1                          | putative mitochondrial chaperone bcs1 [Morus notabilis]                                                 | Under Expressed | D24 |
| s00212g12766 | -3,074 | 0,000 | transcription factor bHLH93-like                      | PREDICTED: transcription factor bHLH93-like [Malus domestica]                                           | Under Expressed | D24 |
| s00042g04632 | -3,071 | 0,002 | DNA-damage-repair/toleration protein                  | DNA-damage-repair/toleration protein [Morus notabilis]                                                  | Under Expressed | D24 |
| s00297g15148 | -3,067 | 0,043 | S-adenosylmethionine-dependent methyltransferase      | putative S-adenosylmethionine-dependent methyltransferase [Morus notabilis] gij587839619 gb EXB30273.1  | Under Expressed | D24 |
| s00005g00867 | -3,064 | 0,014 | -                                                     | PREDICTED: protein SRG1 [Fragaria vesca subsp. vesca]                                                   | Under Expressed | D24 |
| s01266g27919 | -3,061 | 0,043 | uncharacterized RNA-binding protein                   | Uncharacterized RNA-binding protein [Morus notabilis]                                                   | Under Expressed | D24 |
| s00302g15312 | -3,049 | 0,023 | serine/threonine-protein kinase-like protein          | Serine/threonine-protein kinase-like protein [Morus notabilis]                                          | Under Expressed | D24 |
| s00932g25401 | -3,043 | 0,044 | cytochrome P450 77A3                                  | Cytochrome P450 77A3 [Morus notabilis] gij587938697 gb EXC25405.1                                       | Under Expressed | D24 |
| s00085g07457 | -3,041 | 0,001 | -                                                     | PREDICTED: CASP-like protein 4D1 [Fragaria vesca subsp. vesca]                                          | Under Expressed | D24 |
| s00005g00953 | -3,026 | 0,002 | nucleotide-diphospho-sugar transferase family protein | nucleotide-diphospho-sugar transferase family protein [Medicago truncatula] gij657371973 gb KEH17925.1  | Under Expressed | D24 |
| s09261g32886 | -3,020 | 0,038 | NAC domain-containing protein 94                      | Putative NAC domain-containing protein 94 [Morus notabilis]                                             | Under Expressed | D24 |
| s04605g31635 | -3,019 | 0,000 | phi-1-like phosphate-induced protein                  | phi-1-like phosphate-induced protein [Phaseolus vulgaris]                                               | Under Expressed | D24 |
| s00523g20096 | -3,016 | 0,000 | cysteine-rich repeat secretory protein 3 isoform X1   | PREDICTED: cysteine-rich repeat secretory protein 3 isoform X1 [Fragaria vesca subsp. vesca]            | Under Expressed | D24 |

|              |        |       |                                                 |                                                                                                  |                 |     |
|--------------|--------|-------|-------------------------------------------------|--------------------------------------------------------------------------------------------------|-----------------|-----|
| s12085g33550 | -2,996 | 0,045 | -                                               | **** No hits found ****                                                                          | Under Expressed | D24 |
| s00930g25391 | -2,987 | 0,016 | -                                               | **** No hits found ****                                                                          | Under Expressed | D24 |
| s01500g29038 | -2,967 | 0,017 | -                                               | putative calcium-binding protein CML10 [Morus notabilis]                                         | Under Expressed | D24 |
| s01111g26902 | -2,918 | 0,002 | BR enhanced expression 1                        | BR enhanced expression 1 [Theobroma cacao]                                                       | Under Expressed | D24 |
| s00220g13014 | -2,908 | 0,000 | pectinesterase/pectinesterase inhibitor 35      | putative pectinesterase/pectinesterase inhibitor 35 [Morus notabilis] gi 587909537 gb EXB97446.1 | Under Expressed | D24 |
| s00067g06422 | -2,901 | 0,043 | benzyl alcohol O-benzoyltransferase             | PREDICTED: benzyl alcohol O-benzoyltransferase [Prunus mume]                                     | Under Expressed | D24 |
| s00544g20469 | -2,901 | 0,047 | syntaxin-121 protein                            | Syntaxin-121 protein [Gossypium arboreum]                                                        | Under Expressed | D24 |
| s00210g12684 | -2,898 | 0,002 | inactive protein RESTRICTED TEV MOVEMENT 2-like | PREDICTED: inactive protein RESTRICTED TEV MOVEMENT 2-like [Malus domestica]                     | Under Expressed | D24 |
| s00740g23284 | -2,897 | 0,049 | expansin-like protein                           | Expansin-like protein [Morus notabilis] gi 587940103 gb EXC26724.1                               | Under Expressed | D24 |
| s00519g20037 | -2,883 | 0,049 | U-box domain-containing protein 20              | U-box domain-containing protein 20 [Morus notabilis]                                             | Under Expressed | D24 |
| s00460g18925 | -2,863 | 0,006 | annexin D3                                      | Annexin D3 [Morus notabilis] gi 587873455 gb EXB62640.1                                          | Under Expressed | D24 |
| s00361g16784 | -2,863 | 0,038 | disease resistance RPP13-like protein 4         | PREDICTED: disease resistance RPP13-like protein 4 [Prunus mume]                                 | Under Expressed | D24 |
| s00133g09790 | -2,859 | 0,039 | -                                               | protein binding protein, putative [Ricinus communis]                                             | Under Expressed | D24 |
| s00236g13502 | -2,857 | 0,011 | similar to L484_025643                          | ### Not characterized ###:hypothetical protein L484_025643 [Morus notabilis]                     | Under Expressed | D24 |
| s00101g08299 | -2,848 | 0,039 | -                                               | **** No hits found ****                                                                          | Under Expressed | D24 |
| s04524g31609 | -2,844 | 0,033 | inactive purple acid phosphatase 27             | putative inactive purple acid phosphatase 27 [Morus notabilis]                                   | Under Expressed | D24 |
| s00041g04547 | -2,834 | 0,002 | coatomer subunit beta'-3                        | Coatomer subunit beta'-3 [Morus notabilis]                                                       | Under Expressed | D24 |
| s01296g28049 | -2,829 | 0,031 | auxin-induced protein 5NG4                      | Auxin-induced protein 5NG4 [Morus notabilis]                                                     | Under Expressed | D24 |
| s00443g18558 | -2,818 | 0,006 | EG45-like domain containing protein             | PREDICTED: EG45-like domain containing protein [Fragaria vesca subsp. vesca]                     | Under Expressed | D24 |
| s01087g26735 | -2,795 | 0,048 | -                                               | ### Not characterized ###:hypothetical protein L484_021517 [Morus notabilis]                     | Under Expressed | D24 |
| s00007g01222 | -2,790 | 0,014 | mitochondrial uncoupling protein 5              | PREDICTED: mitochondrial uncoupling protein 5 [Cucumis sativus]                                  | Under Expressed | D24 |
| s00337g16177 | -2,790 | 0,002 | nematode resistance protein-like HSPRO2         | PREDICTED: nematode resistance protein-like HSPRO2 [Prunus mume]                                 | Under Expressed | D24 |

|              |        |       |                                                 |                                                                                                                    |                 |     |
|--------------|--------|-------|-------------------------------------------------|--------------------------------------------------------------------------------------------------------------------|-----------------|-----|
| s01332g28263 | -2,768 | 0,029 | uncharacterized LOC105121148                    | uncharacterized LOC105121148 [Populus euphratica]                                                                  | Under Expressed | D24 |
| s00132g09705 | -2,767 | 0,030 | WRKY transcription factor 46                    | putative WRKY transcription factor 46 [Morus notabilis]                                                            | Under Expressed | D24 |
| s00640g21976 | -2,765 | 0,000 | plasmamembrane intrinsic protein 1              | plasmamembrane intrinsic protein 1;3 [Salix purpurea]                                                              | Under Expressed | D24 |
| s00581g21075 | -2,762 | 0,016 | -                                               | ### Not characterized<br>###:hypothetical protein<br>L484_013065 [Morus notabilis]                                 | Under Expressed | D24 |
| s00492g19511 | -2,757 | 0,034 | lysine histidine transporter 1-like             | PREDICTED: lysine histidine transporter 1-like [Tarenaya hassleriana]                                              | Under Expressed | D24 |
| s00517g19996 | -2,749 | 0,022 | -                                               | Chloride channel protein CLC-f [Morus notabilis]                                                                   | Under Expressed | D24 |
| s01221g27665 | -2,742 | 0,000 | alpha,alpha-trehalose-phosphate synthase        | putative alpha,alpha-trehalose-phosphate synthase [UDP-forming] 11 [Morus notabilis]<br>gij587935354 gb EXC22233.1 | Under Expressed | D24 |
| s00146g10358 | -2,725 | 0,024 | NAC domain-containing protein 94                | Putative NAC domain-containing protein 94 [Morus notabilis]                                                        | Under Expressed | D24 |
| s00028g03479 | -2,663 | 0,044 | glutamate receptor 2.7                          | Glutamate receptor 2.7 [Morus notabilis]                                                                           | Under Expressed | D24 |
| s00566g20814 | -2,659 | 0,019 | -                                               | ### Not characterized<br>###:hypothetical protein<br>L484_005841 [Morus notabilis]                                 | Under Expressed | D24 |
| s00185g11856 | -2,655 | 0,007 | cyclin-U4-1-like                                | PREDICTED: cyclin-U4-1-like [Nelumbo nucifera]                                                                     | Under Expressed | D24 |
| s00351g16530 | -2,652 | 0,008 | transcription factor                            | Transcription factor [Morus notabilis]<br>gij587874541 gb EXB63679.1                                               | Under Expressed | D24 |
| s00153g10630 | -2,650 | 0,026 | HTH-type transcriptional regulator protein ptxE | HTH-type transcriptional regulator protein ptxE [Theobroma cacao]                                                  | Under Expressed | D24 |
| s00380g17222 | -2,644 | 0,019 | F-box protein At2g27310-like                    | PREDICTED: F-box protein At2g27310-like [Fragaria vesca subsp. vesca]                                              | Under Expressed | D24 |
| s00021g02839 | -2,619 | 0,020 | transcription factor                            | Transcription factor [Morus notabilis]<br>gij587877853 gb EXB66876.1                                               | Under Expressed | D24 |
| s27635g36101 | -2,616 | 0,037 | -                                               | Heavy metal transport/detoxification superfamily protein, putative [Theobroma cacao]<br>gij508701700 gb EOX93596.1 | Under Expressed | D24 |
| s00470g19108 | -2,614 | 0,041 | -                                               | Polcalcin Jun o 2 [Morus notabilis]<br>gij587932722 gb EXC19749.1                                                  | Under Expressed | D24 |
| s00460g18926 | -2,613 | 0,033 | annexin D4                                      | Annexin D4 [Morus notabilis]<br>gij587873456 gb EXB62641.1                                                         | Under Expressed | D24 |
| s00186g11900 | -2,612 | 0,001 | oligopeptide transporter 6                      | Oligopeptide transporter 6 [Morus notabilis]                                                                       | Under Expressed | D24 |

|              |        |       |                                                                     |                                                                                                                  |                 |     |
|--------------|--------|-------|---------------------------------------------------------------------|------------------------------------------------------------------------------------------------------------------|-----------------|-----|
| s10131g33102 | -2,612 | 0,000 | COBRA-like protein 2 precursor                                      | COBRA-like protein 2 precursor [Medicago truncatula]                                                             | Under Expressed | D24 |
| s00760g23514 | -2,605 | 0,023 | -                                                                   | ***** No hits found *****                                                                                        | Under Expressed | D24 |
| s00154g10665 | -2,594 | 0,030 | -                                                                   | ***** No hits found *****                                                                                        | Under Expressed | D24 |
| s00090g07772 | -2,593 | 0,016 | vinorine synthase                                                   | Vinorine synthase [Morus notabilis] gj 587893898 gb EXB82430.1                                                   | Under Expressed | D24 |
| s00270g14464 | -2,583 | 0,000 | F-box/kelch-repeat protein                                          | F-box/kelch-repeat protein [Morus notabilis]                                                                     | Under Expressed | D24 |
| s00023g03039 | -2,579 | 0,046 | WRKY transcription factor 41                                        | putative WRKY transcription factor 41 [Morus notabilis]                                                          | Under Expressed | D24 |
| s00266g14372 | -2,578 | 0,006 | ceramide-1-phosphate transfer protein                               | PREDICTED: ceramide-1-phosphate transfer protein [Cucumis sativus]                                               | Under Expressed | D24 |
| s00653g22160 | -2,568 | 0,006 | -                                                                   | ***** No hits found *****                                                                                        | Under Expressed | D24 |
| s00012g01791 | -2,566 | 0,042 | receptor-like protein 12                                            | PREDICTED: receptor-like protein 12 [Prunus mume]                                                                | Under Expressed | D24 |
| s00131g09696 | -2,554 | 0,037 | -                                                                   | Importin subunit alpha [Morus notabilis]                                                                         | Under Expressed | D24 |
| s00079g07120 | -2,553 | 0,009 | 6,7-dimethyl-8-ribityllumazine synthase                             | 6,7-dimethyl-8-ribityllumazine synthase [Theobroma cacao]                                                        | Under Expressed | D24 |
| s00001g00176 | -2,546 | 0,020 | -                                                                   | PREDICTED: protein EXORDIUM-like [Glycine max]                                                                   | Under Expressed | D24 |
| s00001g00238 | -2,544 | 0,001 | glucan 1,3-beta-glucosidase A                                       | putative glucan 1,3-beta-glucosidase A [Morus notabilis]                                                         | Under Expressed | D24 |
| s00469g19086 | -2,531 | 0,015 | -                                                                   | ***** No hits found *****                                                                                        | Under Expressed | D24 |
| s01347g28340 | -2,495 | 0,004 | G-type lectin S-receptor-like serine/threonine-protein kinase SD2-5 | G-type lectin S-receptor-like serine/threonine-protein kinase SD2-5 [Morus notabilis] gj 587904174 gb EXB92375.1 | Under Expressed | D24 |
| s00025g03198 | -2,494 | 0,031 | -                                                                   | ***** No hits found *****                                                                                        | Under Expressed | D24 |
| s00464g18997 | -2,475 | 0,001 | galactose oxidase                                                   | PREDICTED: galactose oxidase [Jatropha curcas]                                                                   | Under Expressed | D24 |
| s00426g18219 | -2,464 | 0,000 | zinc finger protein ZAT10                                           | Zinc finger protein ZAT10 [Morus notabilis]                                                                      | Under Expressed | D24 |
| s00163g11009 | -2,453 | 0,041 | galactinol synthase 2-like                                          | PREDICTED: galactinol synthase 2-like [Fragaria vesca subsp. vesca]                                              | Under Expressed | D24 |
| s00891g25008 | -2,446 | 0,022 | reticuline oxidase-like protein                                     | Reticuline oxidase-like protein [Morus notabilis]                                                                | Under Expressed | D24 |
| s00253g13969 | -2,441 | 0,004 | formin-like protein 5                                               | Formin-like protein 5 [Morus notabilis] gj 587861076 gb EXB50940.1                                               | Under Expressed | D24 |
| s00800g23992 | -2,440 | 0,004 | glutamine amidotransferase                                          | Putative Glutamine amidotransferase [Morus notabilis]                                                            | Under Expressed | D24 |
| s00191g12061 | -2,433 | 0,002 | glutaredoxin family protein                                         | Glutaredoxin family protein, putative [Theobroma cacao]                                                          | Under Expressed | D24 |



|              |        |       |                                                 |                                                                                                                   |                 |     |
|--------------|--------|-------|-------------------------------------------------|-------------------------------------------------------------------------------------------------------------------|-----------------|-----|
| s00133g09773 | -2,426 | 0,022 | -                                               | PREDICTED: protein BPS1, chloroplastic-like [Prunus mume]                                                         | Under Expressed | D24 |
| s00012g01869 | -2,421 | 0,009 | chitotriosidase-1-like                          | PREDICTED: chitotriosidase-1-like [Prunus mume]                                                                   | Under Expressed | D24 |
| s00567g20842 | -2,418 | 0,037 | ocs element-binding factor 1                    | Ocs element-binding factor 1 [Morus notabilis]                                                                    | Under Expressed | D24 |
| s00203g12462 | -2,416 | 0,005 | ABC transporter G family member 6               | ABC transporter G family member 6 [Morus notabilis]                                                               | Under Expressed | D24 |
| s00483g19354 | -2,416 | 0,001 | -                                               | ***** No hits found *****                                                                                         | Under Expressed | D24 |
| s00451g18730 | -2,415 | 0,030 | GEM-like protein 8                              | PREDICTED: putative GEM-like protein 8 [Vitis vinifera]                                                           | Under Expressed | D24 |
| s00278g14658 | -2,400 | 0,000 | -                                               | ### Not characterized<br>###:PREDICTED: uncharacterized protein LOC104234424 [Nicotiana glauca]                   | Under Expressed | D24 |
| s01280g27982 | -2,394 | 0,019 | wall-associated receptor kinase-like 10         | Wall-associated receptor kinase-like 10 [Morus notabilis]                                                         | Under Expressed | D24 |
| s00256g14066 | -2,376 | 0,014 | RING-H2 finger protein ATL11                    | RING-H2 finger protein ATL11 [Morus notabilis]                                                                    | Under Expressed | D24 |
| s00556g20661 | -2,372 | 0,019 | uncharacterized protein TCM_015048              | ### Not characterized<br>###:Uncharacterized protein TCM_015048 [Theobroma cacao]                                 | Under Expressed | D24 |
| s00113g08891 | -2,348 | 0,001 | inactive purple acid phosphatase 1-like protein | putative inactive purple acid phosphatase 1-like protein [Gossypium arboreum]                                     | Under Expressed | D24 |
| s00200g12349 | -2,342 | 0,023 | -                                               | stress induced protein [Vitis vinifera]<br>gi 225580061 gb ACN94268.1 <br>stress induced protein [Vitis vinifera] | Under Expressed | D24 |
| s00092g07859 | -2,341 | 0,032 | -                                               | PREDICTED: E3 ubiquitin-protein ligase RING1-like [Nelumbo nucifera]                                              | Under Expressed | D24 |
| s00004g00731 | -2,339 | 0,026 | beta-galactosidase 3                            | Beta-galactosidase 3 [Morus notabilis]<br>gi 587938279 gb EXC25028.1                                              | Under Expressed | D24 |
| s00604g21446 | -2,334 | 0,000 | similar to L484_003785                          | ### Not characterized<br>###:hypothetical protein L484_003785 [Morus notabilis]                                   | Under Expressed | D24 |
| s00059g05860 | -2,324 | 0,000 | -                                               | Homeobox-leucine zipper protein HOX9, putative [Theobroma cacao]                                                  | Under Expressed | D24 |
| s00183g11766 | -2,310 | 0,003 | senescence associated gene 20                   | Senescence associated gene 20, putative [Theobroma cacao]                                                         | Under Expressed | D24 |
| s01003g26053 | -2,281 | 0,015 | aromatic-L-amino-acid decarboxylase             | Aromatic-L-amino-acid decarboxylase [Morus notabilis]                                                             | Under Expressed | D24 |
| s00412g17914 | -2,281 | 0,035 | oligopeptide transporter 1                      | Oligopeptide transporter 1 [Morus notabilis]                                                                      | Under Expressed | D24 |
| s00004g00730 | -2,281 | 0,010 | beta-galactosidase 3                            | Beta-galactosidase 3 [Morus notabilis]<br>gi 587938279 gb EXC25028.1                                              | Under Expressed | D24 |

|              |        |       |                                                             |                                                                                                             |                 |     |
|--------------|--------|-------|-------------------------------------------------------------|-------------------------------------------------------------------------------------------------------------|-----------------|-----|
| s01823g30047 | -2,222 | 0,001 | PAE                                                         | PAE [Litchi chinensis]                                                                                      | Under Expressed | D24 |
| s00393g17505 | -2,221 | 0,042 | alpha carbonic anhydrase 4-like                             | PREDICTED: alpha carbonic anhydrase 4-like [Eucalyptus grandis]                                             | Under Expressed | D24 |
| s00045g04877 | -2,209 | 0,012 | guanine nucleotide-binding protein alpha-1 subunit          | Guanine nucleotide-binding protein alpha-1 subunit [Morus notabilis] gi 587874507 gb EXB63645.1             | Under Expressed | D24 |
| s00317g15702 | -2,208 | 0,025 | ethylene-responsive transcription factor 4                  | Ethylene-responsive transcription factor 4 [Morus notabilis]                                                | Under Expressed | D24 |
| s00001g00171 | -2,196 | 0,012 | phospho-2-dehydro-3-deoxyheptonate aldolase 2               | Phospho-2-dehydro-3-deoxyheptonate aldolase 2 [Morus notabilis]                                             | Under Expressed | D24 |
| s00010g01581 | -2,192 | 0,000 | ACT domain-containing protein ACR1                          | PREDICTED: ACT domain-containing protein ACR1 [Fragaria vesca subsp. vesca] gi 764516880 ref XP_011466252.1 | Under Expressed | D24 |
| s00117g09048 | -2,181 | 0,012 | LRR receptor-like serine/threonine-protein kinase At4g26540 | PREDICTED: probable LRR receptor-like serine/threonine-protein kinase At4g26540 [Prunus mume]               | Under Expressed | D24 |
| s00012g01864 | -2,180 | 0,021 | similar to L484_014458                                      | ### Not characterized<br>###:hypothetical protein L484_014458 [Morus notabilis]                             | Under Expressed | D24 |
| s00343g16343 | -2,178 | 0,001 | auxin-induced protein X15-like                              | PREDICTED: auxin-induced protein X15-like [Pyrus x bretschneideri]                                          | Under Expressed | D24 |
| s00044g04826 | -2,174 | 0,006 | S-adenosylmethionine decarboxylase proenzyme 3              | S-adenosylmethionine decarboxylase proenzyme 3 [Morus notabilis]                                            | Under Expressed | D24 |
| s00203g12461 | -2,165 | 0,045 | caffeoylshikimate esterase-like                             | PREDICTED: caffeoylshikimate esterase-like [Pyrus x bretschneideri]                                         | Under Expressed | D24 |
| s00062g06083 | -2,155 | 0,005 | receptor-like protein kinase HAIKU2                         | Receptor-like protein kinase HAIKU2 [Morus notabilis]                                                       | Under Expressed | D24 |
| s00010g01619 | -2,151 | 0,016 | xyloglucan endotransglucosylase/hydrolase protein 6         | putative xyloglucan endotransglucosylase/hydrolase protein 6 [Morus notabilis] gi 587889580 gb EXB78247.1   | Under Expressed | D24 |
| s00162g11007 | -2,146 | 0,001 | bark storage protein A                                      | Bark storage protein A [Morus notabilis]                                                                    | Under Expressed | D24 |
| s00419g18069 | -2,145 | 0,001 | ethylene-responsive transcription factor 12                 | Ethylene-responsive transcription factor 12 [Morus notabilis]                                               | Under Expressed | D24 |
| s01010g26115 | -2,145 | 0,000 | lysosomal beta glucosidase                                  | Lysosomal beta glucosidase [Morus notabilis]                                                                | Under Expressed | D24 |
| s00059g05899 | -2,144 | 0,003 | lysM domain-containing GPI-anchored protein 2               | LysM domain-containing GPI-anchored protein 2 [Morus notabilis]                                             | Under Expressed | D24 |
| s00098g08137 | -2,128 | 0,001 | verprolin-like                                              | PREDICTED: verprolin-like [Gossypium raimondii]                                                             | Under Expressed | D24 |

|              |        |       |                                                                            |                                                                                                                         |                 |     |
|--------------|--------|-------|----------------------------------------------------------------------------|-------------------------------------------------------------------------------------------------------------------------|-----------------|-----|
| s00109g08662 | -2,123 | 0,019 | non-specific lipid transfer protein GPI-anchored 1-like                    | PREDICTED: non-specific lipid transfer protein GPI-anchored 1-like [Malus domestica]                                    | Under Expressed | D24 |
| s01041g26392 | -2,122 | 0,046 | xyloglucan endotransglucosylase/hydrolase protein 9                        | Xyloglucan endotransglucosylase/hydrolase protein 9 [Morus notabilis] gjj587936334 gb EXC23178.1                        | Under Expressed | D24 |
| s07452g32410 | -2,119 | 0,000 | -                                                                          | Nodulin MtN21 /EamA-like transporter family protein, putative isoform 1 [Theobroma cacao] gjj508705522 gb EOX97418.1    | Under Expressed | D24 |
| s00541g20427 | -2,117 | 0,013 | inositol oxygenase 1                                                       | Inositol oxygenase 1 [Morus notabilis] gjj587885754 gb EXB74611.1                                                       | Under Expressed | D24 |
| s00069g06515 | -2,115 | 0,006 | -                                                                          | ### Not characterized<br>###:hypothetical protein L484_027272 [Morus notabilis]                                         | Under Expressed | D24 |
| s00048g05051 | -2,112 | 0,004 | U-box domain-containing protein 20                                         | U-box domain-containing protein 20 [Morus notabilis]                                                                    | Under Expressed | D24 |
| s01623g29491 | -2,107 | 0,026 | cytochrome P450 71A1-like                                                  | PREDICTED: cytochrome P450 71A1-like [Fragaria vesca subsp. vesca]                                                      | Under Expressed | D24 |
| s00029g03576 | -2,099 | 0,000 | ATP binding protein                                                        | ATP binding protein, putative [Ricinus communis]                                                                        | Under Expressed | D24 |
| s00091g07781 | -2,093 | 0,029 | calreticulin-3-like isoform X2                                             | PREDICTED: calreticulin-3-like isoform X2 [Cicer arietinum]                                                             | Under Expressed | D24 |
| s00285g14844 | -2,087 | 0,024 | -                                                                          | ***** No hits found *****                                                                                               | Under Expressed | D24 |
| s00305g15394 | -2,086 | 0,017 | exocyst complex component 7                                                | Exocyst complex component 7 [Morus notabilis]                                                                           | Under Expressed | D24 |
| s00088g07627 | -2,077 | 0,033 | -                                                                          | ### Not characterized<br>###:hypothetical protein MIMGU_mgv1a014916mg [Erythranthe guttata]                             | Under Expressed | D24 |
| s01098g26811 | -2,062 | 0,039 | ankyrin repeat-containing protein                                          | Ankyrin repeat-containing protein [Morus notabilis]                                                                     | Under Expressed | D24 |
| s00462g18963 | -2,060 | 0,023 | -                                                                          | ***** No hits found *****                                                                                               | Under Expressed | D24 |
| s00075g06904 | -2,056 | 0,047 | leucine-rich repeat receptor-like serine/threonine/tyrosine-protein kinase | Leucine-rich repeat receptor-like serine/threonine/tyrosine-protein kinase [Morus notabilis] gjj587906372 gb EXB94444.1 | Under Expressed | D24 |
| s00832g24347 | -2,052 | 0,001 | -                                                                          | Oxidative stress 3, putative isoform 2 [Theobroma cacao]                                                                | Under Expressed | D24 |
| s00007g01181 | -2,050 | 0,003 | similar to L484_019803                                                     | ### Not characterized<br>###:hypothetical protein L484_019803 [Morus notabilis]                                         | Under Expressed | D24 |
| s00014g02030 | -2,040 | 0,032 | beta-galactosidase 1                                                       | Beta-galactosidase 1 [Morus notabilis] gjj587923778 gb EXC11109.1                                                       | Under Expressed | D24 |
| s00587g21145 | -2,039 | 0,033 | glutamyl-tRNA reductase 1                                                  | Glutamyl-tRNA reductase 1 [Morus notabilis]                                                                             | Under Expressed | D24 |
| s00019g02669 | -2,038 | 0,007 | -                                                                          | ### Not characterized<br>###:hypothetical protein L484_024428 [Morus notabilis]                                         | Under Expressed | D24 |

|              |        |       |                                                               |                                                                                                            |                 |     |
|--------------|--------|-------|---------------------------------------------------------------|------------------------------------------------------------------------------------------------------------|-----------------|-----|
| s00163g11019 | -2,033 | 0,000 | alkaline/neutral invertase CINV2                              | PREDICTED: alkaline/neutral invertase CINV2 [Prunus mume]                                                  | Under Expressed | D24 |
| s00373g17068 | -2,032 | 0,000 | stem-specific protein TSJT1                                   | Stem-specific protein TSJT1, putative [Ricinus communis]                                                   | Under Expressed | D24 |
| s19183g34895 | -2,022 | 0,023 | -                                                             | ***** No hits found *****                                                                                  | Under Expressed | D24 |
| s00509g19847 | -2,018 | 0,017 | linoleate 9S-lipoxygenase 5                                   | putative linoleate 9S-lipoxygenase 5 [Morus notabilis]                                                     | Under Expressed | D24 |
| s00148g10451 | -2,004 | 0,000 | glycerol-3-phosphate acyltransferase 3                        | PREDICTED: probable glycerol-3-phosphate acyltransferase 3 [Populus euphratica]                            | Under Expressed | D24 |
| s00113g08845 | -2,001 | 0,000 | serine/threonine-protein kinase HT1                           | Serine/threonine-protein kinase HT1 [Morus notabilis]                                                      | Under Expressed | D24 |
| s01400g28607 | -1,996 | 0,032 | zinc-regulated protein 8-like                                 | PREDICTED: zinc-regulated protein 8-like [Gossypium raimondii]                                             | Under Expressed | D24 |
| s01022g26217 | -1,989 | 0,048 | -                                                             | ***** No hits found *****                                                                                  | Under Expressed | D24 |
| s01842g30086 | -1,988 | 0,028 | G-type lectin S-receptor-like serine/threonine-protein kinase | G-type lectin S-receptor-like serine/threonine-protein kinase [Morus notabilis] gi 587922781 gb EXC10167.1 | Under Expressed | D24 |
| s00539g20370 | -1,982 | 0,003 | octicosapeptide/Phox/Bem1p family protein                     | Octicosapeptide/Phox/Bem1p family protein [Theobroma cacao]                                                | Under Expressed | D24 |
| s00112g08805 | -1,981 | 0,000 | bidirectional sugar transporter SWEET17                       | Bidirectional sugar transporter SWEET17 [Morus notabilis]                                                  | Under Expressed | D24 |
| s00611g21551 | -1,978 | 0,008 | -                                                             | ***** No hits found *****                                                                                  | Under Expressed | D24 |
| s00088g07643 | -1,978 | 0,002 | pseudo response regulator, putative isoform 4                 | Pseudo response regulator, putative isoform 4 [Theobroma cacao]                                            | Under Expressed | D24 |
| s00345g16365 | -1,977 | 0,037 | leucine-rich repeat receptor-like tyrosine-protein kinase     | Leucine-rich repeat receptor-like tyrosine-protein kinase [Morus notabilis] gi 587868024 gb EXB57397.1     | Under Expressed | D24 |
| s00285g14843 | -1,975 | 0,000 | UDP-glucuronate 4-epimerase 6                                 | UDP-glucuronate 4-epimerase 6 [Morus notabilis]                                                            | Under Expressed | D24 |
| s00136g09882 | -1,971 | 0,001 | homeobox-leucine zipper protein ATHB-7                        | Homeobox-leucine zipper protein ATHB-7 [Morus notabilis]                                                   | Under Expressed | D24 |
| s08589g32731 | -1,969 | 0,024 | reticuline oxidase-like protein                               | Reticuline oxidase-like protein [Morus notabilis]                                                          | Under Expressed | D24 |
| s00013g01919 | -1,964 | 0,039 | DNA binding protein                                           | DNA binding protein, putative [Ricinus communis]                                                           | Under Expressed | D24 |
| s00080g07212 | -1,956 | 0,012 | calcium-binding protein CML41                                 | putative calcium-binding protein CML41 [Morus notabilis]                                                   | Under Expressed | D24 |
| s00435g18387 | -1,949 | 0,038 | reticuline oxidase-like protein                               | Reticuline oxidase-like protein [Morus notabilis]                                                          | Under Expressed | D24 |
| s00069g06534 | -1,948 | 0,004 | auxin-responsive protein IAA3                                 | Auxin-responsive protein IAA3 [Morus notabilis]                                                            | Under Expressed | D24 |

|              |        |       |                                           |                                                                                                              |                 |     |
|--------------|--------|-------|-------------------------------------------|--------------------------------------------------------------------------------------------------------------|-----------------|-----|
| s00965g25719 | -1,942 | 0,045 | glutathione S-transferase parA            | putative glutathione S-transferase parA [Morus notabilis]                                                    | Under Expressed | D24 |
| s02447g30886 | -1,940 | 0,000 | lupeol synthase                           | Lupeol synthase [Morus notabilis] gij587852429 gb EXB42556.1                                                 | Under Expressed | D24 |
| s00511g19881 | -1,939 | 0,000 | GDSL esterase/lipase 1                    | GDSL esterase/lipase 1 [Morus notabilis]                                                                     | Under Expressed | D24 |
| s00442g18543 | -1,933 | 0,039 | -                                         | PREDICTED: probable protein phosphatase 2C 25 [Pyrus x bretschnideri]                                        | Under Expressed | D24 |
| s00932g25402 | -1,933 | 0,001 | cytochrome P450 77A3                      | Cytochrome P450 77A3 [Morus notabilis] gij587938697 gb EXC25405.1                                            | Under Expressed | D24 |
| s00309g15490 | -1,928 | 0,030 | -                                         | CAMP-regulated phosphoprotein 19-related protein isoform 1 [Theobroma cacao] gij590661689 ref XP_007035743.1 | Under Expressed | D24 |
| s00667g22355 | -1,923 | 0,049 | GATA transcription factor 5-like          | PREDICTED: GATA transcription factor 5-like [Prunus mume]                                                    | Under Expressed | D24 |
| s01166g27296 | -1,920 | 0,001 | mitogen-activated protein kinase kinase 4 | Mitogen-activated protein kinase kinase 4 [Morus notabilis]                                                  | Under Expressed | D24 |
| s00055g05581 | -1,906 | 0,028 | aquaporin TIP2-1-like                     | PREDICTED: aquaporin TIP2-1-like [Populus euphratica]                                                        | Under Expressed | D24 |
| s01267g27927 | -1,899 | 0,032 | -                                         | ***** No hits found *****                                                                                    | Under Expressed | D24 |
| s00082g07294 | -1,891 | 0,000 | neurofilament medium polypeptide          | PREDICTED: neurofilament medium polypeptide [Prunus mume]                                                    | Under Expressed | D24 |
| s00341g16291 | -1,888 | 0,000 | similar to L484_014311                    | ### Not characterized<br>###:hypothetical protein L484_014311 [Morus notabilis]                              | Under Expressed | D24 |
| s00232g13384 | -1,887 | 0,008 | -                                         | ### Not characterized<br>###:hypothetical protein L484_005250 [Morus notabilis]                              | Under Expressed | D24 |
| s00681g22516 | -1,880 | 0,025 | disease resistance protein RPM1           | Disease resistance protein RPM1 [Morus notabilis]                                                            | Under Expressed | D24 |
| s00723g23058 | -1,878 | 0,034 | histone-lysine N-methyltransferase SETD1B | PREDICTED: histone-lysine N-methyltransferase SETD1B [Vitis vinifera]                                        | Under Expressed | D24 |
| s00006g01064 | -1,876 | 0,018 | raffinose synthase family protein         | Raffinose synthase family protein [Theobroma cacao]                                                          | Under Expressed | D24 |
| s00143g10192 | -1,874 | 0,004 | similar to L484_010786                    | ### Not characterized<br>###:hypothetical protein L484_010786 [Morus notabilis]                              | Under Expressed | D24 |
| s00149g10512 | -1,870 | 0,002 | -                                         | ***** No hits found *****                                                                                    | Under Expressed | D24 |
| s00225g13175 | -1,866 | 0,000 | similar to L484_003293                    | ### Not characterized<br>###:hypothetical protein L484_003293 [Morus notabilis]                              | Under Expressed | D24 |
| s10982g33306 | -1,862 | 0,042 | -                                         | PREDICTED: glutaredoxin-C9-like [Populus euphratica]                                                         | Under Expressed | D24 |

|              |        |       |                                                               |                                                                                                                |                 |     |
|--------------|--------|-------|---------------------------------------------------------------|----------------------------------------------------------------------------------------------------------------|-----------------|-----|
| s00178g11567 | -1,854 | 0,047 | mitotic spindle checkpoint protein MAD2                       | Mitotic spindle checkpoint protein MAD2 [Populus trichocarpa]                                                  | Under Expressed | D24 |
| s00092g07845 | -1,850 | 0,046 | perakine reductase-like                                       | PREDICTED: perakine reductase-like [Prunus mume]                                                               | Under Expressed | D24 |
| s00102g08340 | -1,847 | 0,024 | GDSL esterase/lipase 1                                        | GDSL esterase/lipase 1 [Morus notabilis]                                                                       | Under Expressed | D24 |
| s00423g18162 | -1,841 | 0,044 | peptide transporter                                           | Peptide transporter [Morus notabilis] gi 587913687 gb EXC01490.1                                               | Under Expressed | D24 |
| s00361g16755 | -1,840 | 0,032 | G-type lectin S-receptor-like serine/threonine-protein kinase | G-type lectin S-receptor-like serine/threonine-protein kinase [Morus notabilis] gi 587924277 gb EXC11582.1     | Under Expressed | D24 |
| s00154g10691 | -1,834 | 0,029 | cytochrome P450 90B1                                          | PREDICTED: cytochrome P450 90B1 [Populus euphratica]                                                           | Under Expressed | D24 |
| s00019g02674 | -1,824 | 0,004 | L-type lectin-domain containing receptor kinase VIII.1        | L-type lectin-domain containing receptor kinase VIII.1 [Morus notabilis] gi 587929073 gb EXC16248.1            | Under Expressed | D24 |
| s01741g29854 | -1,824 | 0,000 | D-3-phosphoglycerate dehydrogenase                            | D-3-phosphoglycerate dehydrogenase [Morus notabilis]                                                           | Under Expressed | D24 |
| s00223g13104 | -1,823 | 0,000 | glucan endo-1,3-beta-glucosidase 7                            | Glucan endo-1,3-beta-glucosidase 7 [Morus notabilis]                                                           | Under Expressed | D24 |
| s12983g33737 | -1,817 | 0,025 | inter-alpha-trypsin inhibitor heavy chain H3 precursor        | Inter-alpha-trypsin inhibitor heavy chain H3 precursor, putative [Ricinus communis] gi 223536573 gb EEF38218.1 | Under Expressed | D24 |
| s12528g33648 | -1,813 | 0,022 | calmodulin-binding protein 25-like                            | PREDICTED: calmodulin-binding protein 25-like [Glycine max]                                                    | Under Expressed | D24 |
| s00075g06895 | -1,811 | 0,019 | E3 ubiquitin-protein ligase RGLG2-like isoform X1             | PREDICTED: E3 ubiquitin-protein ligase RGLG2-like isoform X1 [Citrus sinensis]                                 | Under Expressed | D24 |
| s00056g05629 | -1,799 | 0,001 | peroxidase 47                                                 | Peroxidase 47 [Morus notabilis] gi 587874944 gb EXB64071.1                                                     | Under Expressed | D24 |
| s00496g19600 | -1,797 | 0,011 | F-box/kelch-repeat protein                                    | F-box/kelch-repeat protein [Morus notabilis]                                                                   | Under Expressed | D24 |
| s00425g18184 | -1,786 | 0,043 | similar to L484_021665                                        | ### Not characterized ###:hypothetical protein L484_021665 [Morus notabilis]                                   | Under Expressed | D24 |
| s00148g10450 | -1,782 | 0,003 | glycerol-3-phosphate acyltransferase 3                        | putative glycerol-3-phosphate acyltransferase 3 [Morus notabilis]                                              | Under Expressed | D24 |
| s00067g06359 | -1,780 | 0,014 | glutamine amidotransferase PB2B2.05 isoform X2                | PREDICTED: putative glutamine amidotransferase PB2B2.05 isoform X2 [Nicotiana tomentosiformis]                 | Under Expressed | D24 |
| s00628g21805 | -1,771 | 0,031 | similar to L484_006153                                        | ### Not characterized ###:hypothetical protein L484_006153 [Morus notabilis]                                   | Under Expressed | D24 |
| s01269g27934 | -1,769 | 0,024 | cysteine-rich receptor-like protein kinase 3                  | Cysteine-rich receptor-like protein kinase 3 [Morus notabilis]                                                 | Under Expressed | D24 |
| s00470g19113 | -1,767 | 0,036 | -                                                             | ***** No hits found *****                                                                                      | Under Expressed | D24 |

|              |        |       |                                                                                  |                                                                                                                                  |                    |     |
|--------------|--------|-------|----------------------------------------------------------------------------------|----------------------------------------------------------------------------------------------------------------------------------|--------------------|-----|
| s00090g07725 | -1,762 | 0,047 | uncharacterized protein<br>LOC103321871                                          | ### Not characterized<br>###:PREDICTED: uncharacterized<br>protein LOC103321871 [Prunus<br>mume]                                 | Under<br>Expressed | D24 |
| s00519g20044 | -1,762 | 0,027 | aldose 1-epimerase                                                               | Aldose 1-epimerase [Morus<br>notabilis]<br>gij587906203 gb EXB94289.1                                                            | Under<br>Expressed | D24 |
| s00481g19303 | -1,762 | 0,002 | copperion binding protein                                                        | copperion binding protein, putative<br>[Ricinus communis]                                                                        | Under<br>Expressed | D24 |
| s01358g28404 | -1,748 | 0,034 | WRKY transcription factor 69                                                     | putative WRKY transcription factor<br>69 [Morus notabilis]                                                                       | Under<br>Expressed | D24 |
| s00121g09270 | -1,747 | 0,042 | -                                                                                | PREDICTED: protein PMR5-like<br>[Populus euphratica]                                                                             | Under<br>Expressed | D24 |
| s00245g13758 | -1,746 | 0,027 | riboflavin biosynthesis protein<br>ribBA                                         | Riboflavin biosynthesis protein<br>ribBA [Morus notabilis]                                                                       | Under<br>Expressed | D24 |
| s00083g07366 | -1,739 | 0,012 | UDP-glycosyltransferase 73C3                                                     | UDP-glycosyltransferase 73C3<br>[Morus notabilis]                                                                                | Under<br>Expressed | D24 |
| s00003g00585 | -1,736 | 0,000 | lysine decarboxylase family<br>protein, putative isoform 2                       | Lysine decarboxylase family<br>protein, putative isoform 2<br>[Theobroma cacao]<br>gij508787142 gb EOY34398.1                    | Under<br>Expressed | D24 |
| s00378g17180 | -1,732 | 0,008 | LIM and calponin domains-<br>containing protein 1                                | LIM and calponin domains-<br>containing protein 1, putative<br>[Theobroma cacao]<br>gij508720366 gb EOY12263.1                   | Under<br>Expressed | D24 |
| s01537g29184 | -1,724 | 0,015 | thaumatin-like protein                                                           | PREDICTED: thaumatin-like<br>protein [Fragaria vesca subsp.<br>vesca]                                                            | Under<br>Expressed | D24 |
| s00891g25003 | -1,719 | 0,000 | reticuline oxidase-like protein                                                  | PREDICTED: reticuline oxidase-<br>like protein [Prunus mume]                                                                     | Under<br>Expressed | D24 |
| s00011g01693 | -1,719 | 0,005 | E3 ubiquitin-protein ligase<br>RHA2A                                             | E3 ubiquitin-protein ligase RHA2A<br>[Morus notabilis]                                                                           | Under<br>Expressed | D24 |
| s00151g10597 | -1,717 | 0,040 | -                                                                                | Dehydrin Rab15 [Morus notabilis]<br>gij587938113 gb EXC24886.1                                                                   | Under<br>Expressed | D24 |
| s00106g08497 | -1,712 | 0,045 | serine/arginine repetitive matrix<br>protein 2                                   | Serine/arginine repetitive matrix<br>protein 2, putative [Theobroma<br>cacao]<br>gij508773408 gb EOY20664.1                      | Under<br>Expressed | D24 |
| s00046g04922 | -1,709 | 0,029 | basic helix-loop-helix DNA-<br>binding family protein                            | Basic helix-loop-helix DNA-binding<br>family protein [Theobroma cacao]                                                           | Under<br>Expressed | D24 |
| s00245g13743 | -1,699 | 0,011 | L-type lectin-domain containing<br>receptor kinase S.5                           | putative L-type lectin-domain<br>containing receptor kinase S.5<br>[Morus notabilis]<br>gij587890762 gb EXB79403.1               | Under<br>Expressed | D24 |
| s00077g07027 | -1,697 | 0,015 | cinnamate-4-hydroxylase                                                          | Cinnamate-4-hydroxylase<br>[Theobroma cacao]                                                                                     | Under<br>Expressed | D24 |
| s00452g18735 | -1,691 | 0,038 | serine/threonine-protein<br>phosphatase 6 regulatory ankyrin<br>repeat subunit A | Serine/threonine-protein<br>phosphatase 6 regulatory ankyrin<br>repeat subunit A [Morus notabilis]<br>gij587898459 gb EXB86896.1 | Under<br>Expressed | D24 |
| s00265g14333 | -1,687 | 0,006 | glucan endo-1,3-beta-glucosidase<br>14                                           | Glucan endo-1,3-beta-glucosidase<br>14 [Morus notabilis]                                                                         | Under<br>Expressed | D24 |

|              |        |       |                                                        |                                                                                                                  |                 |     |
|--------------|--------|-------|--------------------------------------------------------|------------------------------------------------------------------------------------------------------------------|-----------------|-----|
| s00361g16776 | -1,682 | 0,001 | zinc finger protein CONSTANS-LIKE 11                   | Putative zinc finger protein CONSTANS-LIKE 11 [Morus notabilis]                                                  | Under Expressed | D24 |
| s00042g04608 | -1,680 | 0,001 | linoleate 13S-lipoxygenase 2-1                         | Linoleate 13S-lipoxygenase 2-1 [Morus notabilis]                                                                 | Under Expressed | D24 |
| s00891g25005 | -1,678 | 0,022 | reticuline oxidase-like protein                        | Reticuline oxidase-like protein [Morus notabilis]                                                                | Under Expressed | D24 |
| s00391g17463 | -1,673 | 0,046 | -                                                      | Protein kinase APK1A [Morus notabilis] gi 587943988 gb EXC30494.1                                                | Under Expressed | D24 |
| s00751g23411 | -1,672 | 0,000 | similar to L484_015990                                 | ### Not characterized<br>###:hypothetical protein L484_015990 [Morus notabilis]                                  | Under Expressed | D24 |
| s00270g14475 | -1,666 | 0,038 | -                                                      | **** No hits found ****                                                                                          | Under Expressed | D24 |
| s00410g17875 | -1,663 | 0,012 | chaperone protein dnaJ 11                              | Chaperone protein dnaJ 11 [Morus notabilis]                                                                      | Under Expressed | D24 |
| s00023g03071 | -1,659 | 0,000 | -                                                      | ### Not characterized<br>###:hypothetical protein L484_001386 [Morus notabilis]                                  | Under Expressed | D24 |
| s00777g23731 | -1,657 | 0,024 | leucine-rich repeat receptor-like protein kinase       | putative leucine-rich repeat receptor-like protein kinase [Morus notabilis] gi 587877349 gb EXB66395.1           | Under Expressed | D24 |
| s00030g03627 | -1,655 | 0,000 | RING-H2 zinc finger protein RHA1a                      | RING-H2 zinc finger protein RHA1a [Morus notabilis]                                                              | Under Expressed | D24 |
| s00156g10748 | -1,650 | 0,023 | -                                                      | **** No hits found ****                                                                                          | Under Expressed | D24 |
| s14273g34003 | -1,634 | 0,004 | -                                                      | ### Not characterized<br>###:hypothetical protein PRUPE_ppa012671mg [Prunus persica]                             | Under Expressed | D24 |
| s00011g01754 | -1,633 | 0,000 | mediator of RNA polymerase II transcription subunit 26 | Mediator of RNA polymerase II transcription subunit 26, putative [Theobroma cacao] gi 508700239 gb EOX92135.1    | Under Expressed | D24 |
| s08346g32666 | -1,631 | 0,025 | thaumatin-like protein isoform 1                       | thaumatin-like protein isoform 1 [Ficus pumila var. awkeotsang]                                                  | Under Expressed | D24 |
| s00033g03912 | -1,621 | 0,002 | -                                                      | ### Not characterized<br>###:hypothetical protein CICLE_v10026775mg [Citrus clementina]                          | Under Expressed | D24 |
| s00440g18490 | -1,620 | 0,044 | sugar transport protein 14                             | Sugar transport protein 14 [Morus notabilis]                                                                     | Under Expressed | D24 |
| s00090g07727 | -1,619 | 0,040 | uncharacterized protein LOC103949845 isoform X1        | ### Not characterized<br>###:PREDICTED: uncharacterized protein LOC103949845 isoform X1 [Pyrus x bretschneideri] | Under Expressed | D24 |
| s00060g05960 | -1,611 | 0,050 | similar to L484_024095                                 | ### Not characterized<br>###:hypothetical protein L484_024095 [Morus notabilis]                                  | Under Expressed | D24 |
| s00513g19933 | -1,610 | 0,039 | nudix hydrolase 16                                     | Nudix hydrolase 16 [Morus notabilis] gi 587847999 gb EXB38302.1                                                  | Under Expressed | D24 |
| s00426g18210 | -1,609 | 0,047 | somatic embryogenesis receptor kinase 1                | Somatic embryogenesis receptor kinase 1 [Morus notabilis]                                                        | Under Expressed | D24 |



|              |        |       |                                                                                           |                                                                                                                                                                                                                                                         |                    |     |
|--------------|--------|-------|-------------------------------------------------------------------------------------------|---------------------------------------------------------------------------------------------------------------------------------------------------------------------------------------------------------------------------------------------------------|--------------------|-----|
| s00280g14730 | -1,607 | 0,004 | similar to L484_024389                                                                    | ### Not characterized<br>###:hypothetical protein<br>L484_024389 [Morus notabilis]                                                                                                                                                                      | Under<br>Expressed | D24 |
| s00518g20014 | -1,600 | 0,031 | gibberellin 3-beta-dioxygenase 4                                                          | Gibberellin 3-beta-dioxygenase 4<br>[Morus notabilis]                                                                                                                                                                                                   | Under<br>Expressed | D24 |
| s00062g06049 | -1,597 | 0,005 | copper transporter 5                                                                      | Copper transporter 5 [Morus<br>notabilis]<br>gij587848712 gb EXB38971.1]                                                                                                                                                                                | Under<br>Expressed | D24 |
| s00172g11380 | -1,597 | 0,018 | NAC domain-containing protein<br>29                                                       | NAC domain-containing protein 29<br>[Morus notabilis]                                                                                                                                                                                                   | Under<br>Expressed | D24 |
| s00057g05744 | -1,596 | 0,015 | 1-aminocyclopropane-1-<br>carboxylate oxidase                                             | 1-aminocyclopropane-1-<br>carboxylate oxidase [Ficus carica]                                                                                                                                                                                            | Under<br>Expressed | D24 |
| s00788g23866 | -1,595 | 0,001 | -                                                                                         | PREDICTED: protein trichome<br>birefringence-like 39 [Populus<br>euphratica]                                                                                                                                                                            | Under<br>Expressed | D24 |
| s00060g05931 | -1,588 | 0,000 | hydroxyproline-rich glycoprotein<br>family protein                                        | Hydroxyproline-rich glycoprotein<br>family protein, putative [Theobroma<br>cacao]<br>gij508777006 gb EOY24262.1]                                                                                                                                        | Under<br>Expressed | D24 |
| s00818g24212 | -1,584 | 0,038 | S-adenosyl-L-methionine-<br>dependent methyltransferases<br>superfamily protein isoform 1 | S-adenosyl-L-methionine-<br>dependent methyltransferases<br>superfamily protein isoform 1<br>[Theobroma cacao]                                                                                                                                          | Under<br>Expressed | D24 |
| s18340g34755 | -1,580 | 0,030 | -                                                                                         | ***** No hits found *****                                                                                                                                                                                                                               | Under<br>Expressed | D24 |
| s00082g07304 | -1,574 | 0,048 | S-adenosylmethionine synthase 2                                                           | METK2_TOBAC RecName:<br>Full=S-adenosylmethionine<br>synthase 2;Short=AdoMet<br>synthase 2;AltName:<br>Full=Methionine<br>adenosyltransferase 2;Short=MAT<br>2 gi 38261499 gb AAR15895.1  S-<br>adenosyl-L-methionine synthetase<br>[Nicotiana tabacum] | Under<br>Expressed | D24 |
| s00599g21354 | -1,573 | 0,035 | microtubule-associated protein<br>TORTIFOLIA1                                             | PREDICTED: microtubule-<br>associated protein TORTIFOLIA1<br>[Malus domestica]                                                                                                                                                                          | Under<br>Expressed | D24 |
| s00063g06155 | -1,569 | 0,049 | momilactone A synthase                                                                    | Momilactone A synthase [Morus<br>notabilis]                                                                                                                                                                                                             | Under<br>Expressed | D24 |
| s00230g13314 | -1,567 | 0,000 | transmembrane protein                                                                     | transmembrane protein, putative<br>[Medicago truncatula]                                                                                                                                                                                                | Under<br>Expressed | D24 |
| s00485g19392 | -1,562 | 0,043 | -                                                                                         | ### Not characterized<br>###:PREDICTED: uncharacterized<br>protein LOC105636851 [Jatropha<br>curcas]                                                                                                                                                    | Under<br>Expressed | D24 |
| s00220g13011 | -1,558 | 0,002 | chitinase-like protein 1                                                                  | Chitinase-like protein 1 [Morus<br>notabilis]                                                                                                                                                                                                           | Under<br>Expressed | D24 |
| s09839g33032 | -1,555 | 0,000 | bifunctional glutamate/proline--<br>tRNA ligase                                           | Bifunctional glutamate/proline--<br>tRNA ligase [Morus notabilis]                                                                                                                                                                                       | Under<br>Expressed | D24 |
| s00468g19072 | -1,555 | 0,024 | folic acidand derivative<br>biosynthetic process                                          | Folic acidand derivative<br>biosynthetic process [Theobroma<br>cacao]                                                                                                                                                                                   | Under<br>Expressed | D24 |
| s00137g09940 | -1,553 | 0,027 | zinc finger CCCH domain-<br>containing protein 29                                         | Zinc finger CCCH domain-<br>containing protein 29 [Morus<br>notabilis]                                                                                                                                                                                  | Under<br>Expressed | D24 |

|              |        |       |                                                        |                                                                                                          |                 |     |
|--------------|--------|-------|--------------------------------------------------------|----------------------------------------------------------------------------------------------------------|-----------------|-----|
| s00230g13320 | -1,552 | 0,040 | monosaccharide-H+ symporter                            | monosaccharide-H+ symporter [Datisca glomerata]                                                          | Under Expressed | D24 |
| s00142g10161 | -1,549 | 0,001 | proton-coupled amino acid transporter 3                | PREDICTED: proton-coupled amino acid transporter 3 [Prunus mume]                                         | Under Expressed | D24 |
| s08740g32763 | -1,548 | 0,048 | cysteine-rich receptor-like protein kinase 25          | Cysteine-rich receptor-like protein kinase 25 [Morus notabilis]                                          | Under Expressed | D24 |
| s00451g18727 | -1,547 | 0,032 | transmembrane protein 53                               | PREDICTED: transmembrane protein 53 [Prunus mume]                                                        | Under Expressed | D24 |
| s01832g30066 | -1,547 | 0,031 | disease resistance protein                             | Disease resistance protein [Morus notabilis]                                                             | Under Expressed | D24 |
| s00066g06356 | -1,543 | 0,005 | auxin transporter-like protein 3                       | PREDICTED: auxin transporter-like protein 3 [Cucumis melo]                                               | Under Expressed | D24 |
| s00275g14583 | -1,543 | 0,002 | 3-ketoacyl-CoA synthase 11                             | 3-ketoacyl-CoA synthase 11 [Morus notabilis]                                                             | Under Expressed | D24 |
| s00903g25127 | -1,542 | 0,019 | glycerol-3-phosphate acyltransferase                   | glycerol-3-phosphate acyltransferase [Medicago truncatula]                                               | Under Expressed | D24 |
| s08531g32714 | -1,540 | 0,016 | -                                                      | putative S-adenosylmethionine-dependent methyltransferase [Morus notabilis] gij587855082[gb]EXB45095.1   | Under Expressed | D24 |
| s00013g02000 | -1,537 | 0,000 | SNF1-related protein kinase regulatory subunit gamma-1 | SNF1-related protein kinase regulatory subunit gamma-1 [Morus notabilis] gij587910127[gb]EXB98015.1      | Under Expressed | D24 |
| s00143g10189 | -1,534 | 0,003 | uncharacterized protein LOC103330325                   | ### Not characterized<br>###:PREDICTED: uncharacterized protein LOC103330325 [Prunus mume]               | Under Expressed | D24 |
| s00104g08421 | -1,533 | 0,001 | amino acid permease 6                                  | PREDICTED: amino acid permease 6 [Nelumbo nucifera]                                                      | Under Expressed | D24 |
| s00104g08422 | -1,532 | 0,000 | amino acid permease 6                                  | Amino acid permease 6 [Theobroma cacao] gij508723703[gb]EOY15600.1                                       | Under Expressed | D24 |
| s07469g32414 | -1,532 | 0,000 | similar to L484_006989                                 | ### Not characterized<br>###:hypothetical protein L484_006989 [Morus notabilis]                          | Under Expressed | D24 |
| s00079g07123 | -1,531 | 0,006 | exocyst complex component 7                            | Exocyst complex component 7 [Morus notabilis]                                                            | Under Expressed | D24 |
| s00384g17303 | -1,531 | 0,016 | transcription factor bHLH75-like                       | PREDICTED: transcription factor bHLH75-like [Populus euphratica]                                         | Under Expressed | D24 |
| s00530g20217 | -1,528 | 0,017 | -                                                      | Methyltransferase-related protein, putative [Theobroma cacao]                                            | Under Expressed | D24 |
| s00606g21471 | -1,527 | 0,000 | -                                                      | PREDICTED: probable LRR receptor-like serine/threonine-protein kinase At1g53420 [Pyrus x bretschneideri] | Under Expressed | D24 |
| s00111g08770 | -1,526 | 0,044 | septum-promoting GTP-binding protein 1                 | Septum-promoting GTP-binding protein 1 [Morus notabilis]                                                 | Under Expressed | D24 |
| s00123g09344 | -1,525 | 0,003 | subtilisin-like protease                               | Subtilisin-like protease [Morus notabilis]                                                               | Under Expressed | D24 |

|              |        |       |                                                     |                                                                                                             |                 |     |
|--------------|--------|-------|-----------------------------------------------------|-------------------------------------------------------------------------------------------------------------|-----------------|-----|
| s00098g08156 | -1,524 | 0,001 | RING-H2 finger protein ATL1                         | RING-H2 finger protein ATL1 [Morus notabilis]                                                               | Under Expressed | D24 |
| s00057g05743 | -1,523 | 0,030 | -                                                   | ***** No hits found *****                                                                                   | Under Expressed | D24 |
| s00001g00232 | -1,522 | 0,003 | periplasmic beta-glucosidase precursor              | Periplasmic beta-glucosidase precursor, putative [Ricinus communis]                                         | Under Expressed | D24 |
| s01464g28874 | -1,518 | 0,039 | alpha-galactosidase/alpha-n-acetylgalactosaminidase | alpha-galactosidase/alpha-n-acetylgalactosaminidase, putative [Ricinus communis] gi 223535102 gb EEF36784.1 | Under Expressed | D24 |
| s09716g33002 | -1,514 | 0,004 | -                                                   | PLATZ transcription factor family protein [Medicago truncatula]                                             | Under Expressed | D24 |
| s07613g32462 | -1,512 | 0,009 | -                                                   | 4-nitrophenylphosphatase, putative [Ricinus communis]                                                       | Under Expressed | D24 |
| s00012g01785 | -1,512 | 0,001 | phenylalanine ammonia lyase 1                       | phenylalanine ammonia lyase 1 [Morus alba]                                                                  | Under Expressed | D24 |
| s00355g16616 | -1,511 | 0,028 | alkaline/neutral invertase CINV2                    | PREDICTED: alkaline/neutral invertase CINV2 [Prunus mume]                                                   | Under Expressed | D24 |
| s00304g15349 | -1,509 | 0,028 | actin cross-linking protein                         | Actin cross-linking protein, putative [Theobroma cacao]                                                     | Under Expressed | D24 |
| s13987g33933 | -1,508 | 0,049 | transcription factor                                | Transcription factor [Morus notabilis] gi 587846520 gb EXB36998.1                                           | Under Expressed | D24 |
| s00337g16181 | -1,477 | 0,000 | amino acid transporter                              | amino acid transporter, putative [Ricinus communis]                                                         | Under Expressed | D24 |
| s02564g30953 | -1,454 | 0,042 | -                                                   | ***** No hits found *****                                                                                   | Under Expressed | D24 |
| s00040g04473 | -1,443 | 0,026 | similar to L484_016065                              | ### Not characterized<br>###:hypothetical protein L484_016065 [Morus notabilis]                             | Under Expressed | D24 |
| s00021g02811 | -1,440 | 0,000 | zinc finger CCCH domain-containing protein 49       | Zinc finger CCCH domain-containing protein 49 [Morus notabilis]                                             | Under Expressed | D24 |
| s02094g30518 | -1,439 | 0,002 | carboxylesterase 8                                  | putative carboxylesterase 8 [Morus notabilis]                                                               | Under Expressed | D24 |
| s00227g13254 | -1,433 | 0,008 | -                                                   | ***** No hits found *****                                                                                   | Under Expressed | D24 |
| s00104g08416 | -1,433 | 0,047 | formin-like protein 18                              | Formin-like protein 18 [Theobroma cacao]                                                                    | Under Expressed | D24 |
| s00601g21386 | -1,430 | 0,000 | 3-ketoacyl-CoA synthase 6                           | 3-ketoacyl-CoA synthase 6 [Theobroma cacao]                                                                 | Under Expressed | D24 |
| s00010g01616 | -1,424 | 0,004 | homeodomain-leucine zipper protein HD4              | Homeodomain-leucine zipper protein HD4 [Theobroma cacao]                                                    | Under Expressed | D24 |
| s00158g10832 | -1,420 | 0,044 | LRR receptor-like protein kinase m4                 | LRR receptor-like protein kinase m4 [Malus domestica]                                                       | Under Expressed | D24 |
| s00258g14121 | -1,411 | 0,000 | beta-hexosaminidase 2                               | PREDICTED: beta-hexosaminidase 2 [Prunus mume]                                                              | Under Expressed | D24 |
| s00522g20088 | -1,407 | 0,049 | mapkinase substrate                                 | mapkinase substrate [Acacia mangium]                                                                        | Under Expressed | D24 |

|              |        |       |                                                                          |                                                                                                                       |                 |     |
|--------------|--------|-------|--------------------------------------------------------------------------|-----------------------------------------------------------------------------------------------------------------------|-----------------|-----|
| s00215g12861 | -1,407 | 0,032 | pectinesterase/pectinesterase inhibitor PPE8B                            | Pectinesterase/pectinesterase inhibitor PPE8B [Morus notabilis]                                                       | Under Expressed | D24 |
| s00803g24018 | -1,401 | 0,008 | cytidine deaminase                                                       | Cytidine deaminase [Morus notabilis] gi 587848572 gb EXB38831.1                                                       | Under Expressed | D24 |
| s00470g19112 | -1,401 | 0,000 | phosphatase 2C family protein isoform 1                                  | Phosphatase 2C family protein isoform 1 [Theobroma cacao]                                                             | Under Expressed | D24 |
| s00029g03549 | -1,399 | 0,001 | triacylglycerol lipase                                                   | triacylglycerol lipase, putative [Ricinus communis]                                                                   | Under Expressed | D24 |
| s01488g28983 | -1,397 | 0,000 | -                                                                        | PREDICTED: zinc finger homeobox protein 4-like [Citrus sinensis]                                                      | Under Expressed | D24 |
| s00192g12068 | -1,395 | 0,001 | similar to L484_018088                                                   | ### Not characterized ###:hypothetical protein L484_018088 [Morus notabilis]                                          | Under Expressed | D24 |
| s00006g01047 | -1,393 | 0,001 | phosphoenolpyruvate/phosphate translocator 2                             | Phosphoenolpyruvate/phosphate translocator 2 [Morus notabilis]                                                        | Under Expressed | D24 |
| s00791g23909 | -1,388 | 0,000 | receptor-like protein kinase                                             | putative receptor-like protein kinase [Morus notabilis]                                                               | Under Expressed | D24 |
| s23147g35493 | -1,384 | 0,042 | phenylalanine ammonia-lyase                                              | Phenylalanine ammonia-lyase [Morus notabilis]                                                                         | Under Expressed | D24 |
| s00049g05153 | -1,383 | 0,000 | inactive receptor kinase                                                 | putative inactive receptor kinase [Morus notabilis]                                                                   | Under Expressed | D24 |
| s00046g04925 | -1,380 | 0,001 | S-adenosyl-L-methionine-dependent methyltransferases superfamily protein | S-adenosyl-L-methionine-dependent methyltransferases superfamily protein [Theobroma cacao] gi 508703717 gb EOX95613.1 | Under Expressed | D24 |
| s00266g14376 | -1,377 | 0,024 | similar to L484_014675                                                   | ### Not characterized ###:hypothetical protein L484_014675 [Morus notabilis]                                          | Under Expressed | D24 |
| s00462g18964 | -1,375 | 0,000 | RING-H2 finger protein ATL54                                             | RING-H2 finger protein ATL54 [Morus notabilis]                                                                        | Under Expressed | D24 |
| s00215g12862 | -1,374 | 0,012 | pectinesterase/pectinesterase inhibitor PPE8B                            | Pectinesterase/pectinesterase inhibitor PPE8B [Morus notabilis]                                                       | Under Expressed | D24 |
| s00105g08440 | -1,372 | 0,003 | soluble inorganic pyrophosphatase                                        | Soluble inorganic pyrophosphatase [Morus notabilis]                                                                   | Under Expressed | D24 |
| s01074g26646 | -1,372 | 0,039 | alpha/beta hydrolase domain-containing protein 17C                       | PREDICTED: alpha/beta hydrolase domain-containing protein 17C [Prunus mume]                                           | Under Expressed | D24 |
| s00009g01444 | -1,368 | 0,028 | UBX domain-containing protein 1                                          | UBX domain-containing protein 1 [Morus notabilis]                                                                     | Under Expressed | D24 |
| s00202g12438 | -1,364 | 0,042 | disease resistance RPP13-like protein 4                                  | Disease resistance RPP13-like protein 4 [Morus notabilis]                                                             | Under Expressed | D24 |
| s00037g04258 | -1,362 | 0,000 | isoflavone 2'-hydroxylase                                                | Isoflavone 2'-hydroxylase [Morus notabilis]                                                                           | Under Expressed | D24 |
| s00009g01547 | -1,360 | 0,000 | calmodulin-like protein 1                                                | Calmodulin-like protein 1 [Morus notabilis]                                                                           | Under Expressed | D24 |
| s00465g19016 | -1,360 | 0,003 | -                                                                        | **** No hits found ****                                                                                               | Under Expressed | D24 |

|              |        |       |                                                   |                                                                                                                 |                    |     |
|--------------|--------|-------|---------------------------------------------------|-----------------------------------------------------------------------------------------------------------------|--------------------|-----|
| s00258g14124 | -1,359 | 0,003 | similar to VITISV_036996                          | ### Not characterized<br>###:hypothetical protein<br>VITISV_036996 [Vitis vinifera]                             | Under<br>Expressed | D24 |
| s00055g05613 | -1,356 | 0,000 | transcription factor                              | Transcription factor [Morus notabilis]<br>gij587885720 gb EXB74577.1 <br>Transcription factor [Morus notabilis] | Under<br>Expressed | D24 |
| s00082g07317 | -1,349 | 0,045 | uncharacterized membrane protein YMR155W-like     | PREDICTED: uncharacterized membrane protein YMR155W-like [Citrus sinensis]                                      | Under<br>Expressed | D24 |
| s00054g05518 | -1,348 | 0,007 | 3-hydroxy-3-methylglutaryl-coenzyme A reductase 2 | 3-hydroxy-3-methylglutaryl-coenzyme A reductase 2 [Morus alba]                                                  | Under<br>Expressed | D24 |
| s00176g11502 | -1,346 | 0,000 | -                                                 | PREDICTED: kinesin-like protein KIF21A [Populus euphratica]                                                     | Under<br>Expressed | D24 |
| s05943g31999 | -1,341 | 0,014 | 1-aminocyclopropane-1-carboxylate oxidase 3       | 1-aminocyclopropane-1-carboxylate oxidase 3 [Morus notabilis]                                                   | Under<br>Expressed | D24 |
| s00055g05554 | -1,340 | 0,013 | similar to L484_026207                            | ### Not characterized<br>###:hypothetical protein<br>L484_026207 [Morus notabilis]                              | Under<br>Expressed | D24 |
| s00348g16432 | -1,339 | 0,034 | serine/threonine-protein kinase                   | putative serine/threonine-protein kinase [Morus notabilis]                                                      | Under<br>Expressed | D24 |
| s00116g09016 | -1,339 | 0,001 | galacturonosyltransferase-like 3                  | putative galacturonosyltransferase-like 3 [Morus notabilis]                                                     | Under<br>Expressed | D24 |
| s00144g10278 | -1,328 | 0,027 | -                                                 | PREDICTED: protein AUXIN-REGULATED GENE INVOLVED IN ORGAN SIZE-like [Pyrus x bretschneideri]                    | Under<br>Expressed | D24 |
| s00232g13380 | -1,320 | 0,000 | -                                                 | **** No hits found ****                                                                                         | Under<br>Expressed | D24 |
| s00309g15501 | -1,308 | 0,029 | GTP-binding protein                               | GTP-binding protein [Morus notabilis]<br>gij587866258 gb EXB55736.1                                             | Under<br>Expressed | D24 |
| s00681g22520 | -1,301 | 0,024 | -                                                 | PREDICTED: protein COBRA-like [Pyrus x bretschneideri]                                                          | Under<br>Expressed | D24 |
| s00376g17145 | -1,298 | 0,000 | pectinesterase/pectinesterase inhibitor 34        | putative pectinesterase/pectinesterase inhibitor 34 [Morus notabilis]<br>gij587895730 gb EXB84224.1             | Under<br>Expressed | D24 |
| s00327g15964 | -1,295 | 0,041 | -                                                 | PREDICTED: protein trichome birefringence-like 35 [Jatropha curcas]                                             | Under<br>Expressed | D24 |
| s00102g08339 | -1,292 | 0,028 | GDSL esterase/lipase 1                            | GDSL esterase/lipase 1 [Morus notabilis]                                                                        | Under<br>Expressed | D24 |
| s00402g17710 | -1,291 | 0,029 | transporter MCH1                                  | putative transporter MCH1 [Morus notabilis]                                                                     | Under<br>Expressed | D24 |
| s00283g14810 | -1,290 | 0,004 | F-box/LRR-repeat protein At4g29420                | PREDICTED: F-box/LRR-repeat protein At4g29420 [Jatropha curcas]                                                 | Under<br>Expressed | D24 |
| s00136g09914 | -1,289 | 0,022 | naringenin,2-oxoglutarate 3-dioxygenase           | Naringenin,2-oxoglutarate 3-dioxygenase [Morus notabilis]                                                       | Under<br>Expressed | D24 |
| s01268g27931 | -1,289 | 0,033 | auxin-induced protein 5NG4                        | Auxin-induced protein 5NG4 [Morus notabilis]                                                                    | Under<br>Expressed | D24 |

|              |        |       |                                                          |                                                                                                                   |                 |     |
|--------------|--------|-------|----------------------------------------------------------|-------------------------------------------------------------------------------------------------------------------|-----------------|-----|
| s00064g06231 | -1,284 | 0,004 | carboxylesterase 15                                      | PREDICTED: probable carboxylesterase 15 [Malus domestica]                                                         | Under Expressed | D24 |
| s00030g03653 | -1,280 | 0,019 | adenylyl-sulfate kinase 3 isoform X2                     | PREDICTED: adenylyl-sulfate kinase 3 isoform X2 [Fragaria vesca subsp. vesca]                                     | Under Expressed | D24 |
| s01354g28377 | -1,278 | 0,013 | -                                                        | PREDICTED: transcription factor bHLH128 [Malus domestica]                                                         | Under Expressed | D24 |
| s00328g15987 | -1,277 | 0,007 | serine/threonine-protein kinase Aurora-1                 | Serine/threonine-protein kinase Aurora-1 [Morus notabilis]                                                        | Under Expressed | D24 |
| s00198g12281 | -1,275 | 0,018 | early nodulin-like protein 2                             | Early nodulin-like protein 2 [Morus notabilis]                                                                    | Under Expressed | D24 |
| s00037g04204 | -1,271 | 0,022 | -                                                        | **** No hits found ****                                                                                           | Under Expressed | D24 |
| s00431g18308 | -1,265 | 0,003 | cytochrome P450 85A                                      | Cytochrome P450 85A [Morus notabilis]<br>gi 587888974 gb EXB77660.1                                               | Under Expressed | D24 |
| s00864g24685 | -1,264 | 0,011 | F-box/kelch-repeat protein                               | F-box/kelch-repeat protein [Morus notabilis]                                                                      | Under Expressed | D24 |
| s00084g07400 | -1,262 | 0,042 | NAC domain-containing protein 100                        | NAC domain-containing protein 100 [Morus notabilis]                                                               | Under Expressed | D24 |
| s00077g06999 | -1,257 | 0,046 | -                                                        | PREDICTED: alpha-galactosidase-like [Pyrus x bretschneideri]                                                      | Under Expressed | D24 |
| s00064g06216 | -1,257 | 0,003 | fasciclin-like arabinogalactan protein 17                | PREDICTED: fasciclin-like arabinogalactan protein 17 [Populus euphratica]<br>gi 743898520 ref XP_011042550.1      | Under Expressed | D24 |
| s00458g18873 | -1,255 | 0,011 | similar to L484_018723                                   | ### Not characterized<br>###:hypothetical protein L484_018723 [Morus notabilis]                                   | Under Expressed | D24 |
| s00635g21905 | -1,253 | 0,026 | reticulon-like protein                                   | Reticulon-like protein [Morus notabilis]                                                                          | Under Expressed | D24 |
| s00791g23906 | -1,251 | 0,000 | receptor-like protein kinase At5g39020                   | PREDICTED: probable receptor-like protein kinase At5g39020 [Pyrus x bretschneideri]                               | Under Expressed | D24 |
| s00137g09958 | -1,248 | 0,000 | cytochrome P450 90A1                                     | PREDICTED: cytochrome P450 90A1 [Prunus mume]                                                                     | Under Expressed | D24 |
| s00280g14734 | -1,248 | 0,000 | plasma intrinsic protein 2,2                             | plasma intrinsic protein 2,2 [Juglans regia]                                                                      | Under Expressed | D24 |
| s01347g28339 | -1,246 | 0,006 | alpha,alpha-trehalose-phosphate synthase [UDP-forming] 7 | putative alpha,alpha-trehalose-phosphate synthase [UDP-forming] 7 [Morus notabilis]<br>gi 587904173 gb EXB92374.1 | Under Expressed | D24 |
| s00023g03035 | -1,243 | 0,045 | uncharacterized protein LOC105351441                     | ### Not characterized<br>###:PREDICTED: uncharacterized protein LOC105351441 [Fragaria vesca subsp. vesca]        | Under Expressed | D24 |
| s00311g15565 | -1,242 | 0,003 | FK506-binding protein 4-like isoform X1                  | PREDICTED: FK506-binding protein 4-like isoform X1 [Brassica napus]                                               | Under Expressed | D24 |
| s05538g31894 | -1,238 | 0,050 | glutamate decarboxylase 1                                | Glutamate decarboxylase 1 [Morus notabilis]                                                                       | Under Expressed | D24 |

|              |        |       |                                                         |                                                                                                                                                                                    |                 |     |
|--------------|--------|-------|---------------------------------------------------------|------------------------------------------------------------------------------------------------------------------------------------------------------------------------------------|-----------------|-----|
| s00134g09807 | -1,237 | 0,005 | -                                                       | ### Not characterized<br>###:PREDICTED: uncharacterized protein LOC100265438 isoform X1 [Vitis vinifera]<br>gij 296086582 emb CBI32217.3  unnamed protein product [Vitis vinifera] | Under Expressed | D24 |
| s00025g03207 | -1,235 | 0,003 | uncharacterized protein LOC106774881                    | ### Not characterized<br>###:PREDICTED: uncharacterized protein LOC106774881 [Vigna radiata var. radiata]                                                                          | Under Expressed | D24 |
| s03023g31136 | -1,232 | 0,004 | -                                                       | UDP-glucosyltransferase, putative [Ricinus communis]                                                                                                                               | Under Expressed | D24 |
| s00053g05435 | -1,228 | 0,048 | polyol transporter 5                                    | Polyol transporter 5 [Morus notabilis]<br>gij 587891305 gb EXB79938.1                                                                                                              | Under Expressed | D24 |
| s00537g20336 | -1,225 | 0,007 | cyclic nucleotide-gated ionchannel 14                   | putative cyclic nucleotide-gated ionchannel 14 [Morus notabilis]                                                                                                                   | Under Expressed | D24 |
| s00187g11939 | -1,223 | 0,022 | NAC domain-containing protein 72                        | NAC domain-containing protein 72 [Morus notabilis]                                                                                                                                 | Under Expressed | D24 |
| s00852g24563 | -1,221 | 0,000 | -                                                       | ### Not characterized<br>###:hypothetical protein L484_008140 [Morus notabilis]                                                                                                    | Under Expressed | D24 |
| s00573g20950 | -1,219 | 0,006 | cytochrome P450 71A1                                    | Cytochrome P450 71A1 [Morus notabilis]<br>gij 587867550 gb EXB56947.1  Cytochrome P450 71A1 [Morus notabilis]                                                                      | Under Expressed | D24 |
| s00162g11005 | -1,218 | 0,003 | glycosyltransferase family protein 64 protein C5        | PREDICTED: glycosyltransferase family protein 64 protein C5 [Fragaria vesca subsp. vesca]                                                                                          | Under Expressed | D24 |
| s00982g25868 | -1,217 | 0,003 | transcription factor RF2b                               | Transcription factor RF2b [Morus notabilis]                                                                                                                                        | Under Expressed | D24 |
| s00384g17300 | -1,213 | 0,000 | mannose-6-phosphate isomerase                           | putative mannose-6-phosphate isomerase [Morus notabilis]                                                                                                                           | Under Expressed | D24 |
| s00427g18234 | -1,210 | 0,014 | uncharacterized protein L484_005224                     | ### Not characterized<br>###:Uncharacterized protein L484_005224 [Morus notabilis]                                                                                                 | Under Expressed | D24 |
| s03565g31304 | -1,209 | 0,003 | MLO-like protein 6                                      | PREDICTED: MLO-like protein 6 [Populus euphratica]                                                                                                                                 | Under Expressed | D24 |
| s00150g10531 | -1,206 | 0,001 | patatin group A-3                                       | Patatin group A-3 [Morus notabilis]<br>gij 587891462 gb EXB80085.1                                                                                                                 | Under Expressed | D24 |
| s00791g23908 | -1,205 | 0,036 | -                                                       | PREDICTED: probable receptor-like protein kinase At1g67000, partial [Vigna radiata var. radiata]                                                                                   | Under Expressed | D24 |
| s01598g29417 | -1,201 | 0,000 | -                                                       | PREDICTED: protein MIZU-KUSSEI 1 [Vitis vinifera]                                                                                                                                  | Under Expressed | D24 |
| s00008g01311 | -1,197 | 0,044 | F-box/kelch-repeat protein SKIP6                        | F-box/kelch-repeat protein SKIP6 [Morus notabilis]                                                                                                                                 | Under Expressed | D24 |
| s04767g31683 | -1,197 | 0,000 | membrane lipoprotein lipid attachment site-like protein | membrane lipoprotein lipid attachment site-like protein, putative [Medicago truncatula]<br>gij 657373996 gb KEH19601.1                                                             | Under Expressed | D24 |
| s07483g32420 | -1,197 | 0,042 | seven transmembrane MLO family protein                  | Seven transmembrane MLO family protein [Theobroma cacao]                                                                                                                           | Under Expressed | D24 |

|              |        |       |                                                     |                                                                                                  |                 |     |
|--------------|--------|-------|-----------------------------------------------------|--------------------------------------------------------------------------------------------------|-----------------|-----|
| s00142g10154 | -1,196 | 0,022 | transporter                                         | putative transporter [Morus notabilis] gij587907084 gb EXB95111.1                                | Under Expressed | D24 |
| s00679g22496 | -1,195 | 0,045 | guanylate kinase                                    | Guanylate kinase [Morus notabilis] gij587863124 gb EXB52902.1                                    | Under Expressed | D24 |
| s01096g26796 | -1,183 | 0,000 | BOI-related E3 ubiquitin-protein ligase 1           | PREDICTED: BOI-related E3 ubiquitin-protein ligase 1 [Fragaria vesca subsp. vesca]               | Under Expressed | D24 |
| s00300g15255 | -1,178 | 0,000 | U-box domain-containing protein 18                  | U-box domain-containing protein 18 [Morus notabilis]                                             | Under Expressed | D24 |
| s00909g25195 | -1,174 | 0,040 | cysteine proteinase RD21a                           | Cysteine proteinase RD21a [Morus notabilis]                                                      | Under Expressed | D24 |
| s00052g05349 | -1,169 | 0,028 | pectinesterase 1                                    | Pectinesterase 1 [Morus notabilis] gij587860032 gb EXB49963.1                                    | Under Expressed | D24 |
| s00444g18587 | -1,168 | 0,008 | F-box protein                                       | F-box protein [Morus notabilis] gij587866374 gb EXB55843.1                                       | Under Expressed | D24 |
| s00094g07941 | -1,168 | 0,028 | tubulin beta-1 chain                                | Tubulin beta-1 chain [Morus notabilis] gij587846916 gb EXB37356.1                                | Under Expressed | D24 |
| s00812g24128 | -1,161 | 0,009 | -                                                   | PREDICTED: protein MIZU-KUSSEI 1 [Malus domestica]                                               | Under Expressed | D24 |
| s00063g06126 | -1,154 | 0,038 | aspartic proteinase nepenthesin-2                   | Aspartic proteinase nepenthesin-2 [Morus notabilis]                                              | Under Expressed | D24 |
| s00117g09083 | -1,153 | 0,005 | L-type lectin-domain containing receptor kinase S.1 | L-type lectin-domain containing receptor kinase S.1 [Morus notabilis] gij587905385 gb EXB93547.1 | Under Expressed | D24 |
| s00038g04285 | -1,152 | 0,003 | 21 kDa protein                                      | PREDICTED: 21 kDa protein [Prunus mume]                                                          | Under Expressed | D24 |
| s00175g11474 | -1,150 | 0,012 | GDP-mannose 4,6 dehydratase 2                       | GDP-mannose 4,6 dehydratase 2 [Morus notabilis]                                                  | Under Expressed | D24 |
| s00103g08359 | -1,148 | 0,039 | glutamate decarboxylase 1 -like protein             | Glutamate decarboxylase 1 -like protein [Gossypium arboreum]                                     | Under Expressed | D24 |
| s00035g04110 | -1,148 | 0,050 | polygalacturonase                                   | putative polygalacturonase [Morus notabilis]                                                     | Under Expressed | D24 |
| s00321g15827 | -1,145 | 0,001 | ammonium transporter 2                              | Ammonium transporter 2 [Morus notabilis]                                                         | Under Expressed | D24 |
| s00014g02048 | -1,142 | 0,003 | glycosyl hydrolases family 32 protein isoform 1     | Glycosyl hydrolases family 32 protein isoform 1 [Theobroma cacao]                                | Under Expressed | D24 |
| s00053g05417 | -1,142 | 0,044 | dynein light chain LC6, flagellar outerarm          | Dynein light chain LC6, flagellar outerarm [Morus notabilis]                                     | Under Expressed | D24 |
| s00556g20662 | -1,138 | 0,000 | MRNA, cds, clone: RAFL24-31-B07                     | MRNA, cds, clone: RAFL24-31-B07, putative [Theobroma cacao]                                      | Under Expressed | D24 |
| s01049g26466 | -1,137 | 0,038 | -                                                   | CCL1 [Humulus lupulus]                                                                           | Under Expressed | D24 |
| s00059g05863 | -1,135 | 0,011 | fasciclin-like arabinogalactan protein 10           | PREDICTED: fasciclin-like arabinogalactan protein 10 [Fragaria vesca subsp. vesca]               | Under Expressed | D24 |
| s00151g10556 | -1,125 | 0,000 | GATA transcription factor 5                         | GATA transcription factor 5 [Morus notabilis]                                                    | Under Expressed | D24 |
| s00764g23570 | -1,122 | 0,017 | DUF630 family protein                               | DUF630 family protein [Medicago truncatula]                                                      | Under Expressed | D24 |



|              |        |       |                                                           |                                                                                                         |                 |     |
|--------------|--------|-------|-----------------------------------------------------------|---------------------------------------------------------------------------------------------------------|-----------------|-----|
| s00077g07000 | -1,122 | 0,010 | alpha-galactosidase 3                                     | PREDICTED: alpha-galactosidase 3 [Jatropha curcas]                                                      | Under Expressed | D24 |
| s00673g22417 | -1,119 | 0,046 | sodium-coupled neutral amino acid transporter 4           | PREDICTED: sodium-coupled neutral amino acid transporter 4 [Pyrus x bretschneideri]                     | Under Expressed | D24 |
| s00289g14963 | -1,115 | 0,010 | OPA3-like protein                                         | PREDICTED: OPA3-like protein [Vitis vinifera]                                                           | Under Expressed | D24 |
| s00007g01208 | -1,114 | 0,003 | -                                                         | ### Not characterized<br>###:hypothetical protein [Plasmodium vivax Sal-1]                              | Under Expressed | D24 |
| s02101g30525 | -1,111 | 0,001 | agmatine coumaroyltransferase                             | Agmatine coumaroyltransferase [Morus notabilis]                                                         | Under Expressed | D24 |
| s00791g23907 | -1,100 | 0,039 | -                                                         | putative receptor-like protein kinase [Morus notabilis]                                                 | Under Expressed | D24 |
| s00193g12132 | -1,098 | 0,034 | ranBP2-type zinc finger protein At1g67325-like isoform X1 | PREDICTED: ranBP2-type zinc finger protein At1g67325-like isoform X1 [Vitis vinifera]                   | Under Expressed | D24 |
| s00227g13253 | -1,093 | 0,014 | bidirectional sugar transporter SWEET1 -like protein      | Bidirectional sugar transporter SWEET1 -like protein [Gossypium arboreum]                               | Under Expressed | D24 |
| s00107g08555 | -1,092 | 0,032 | serine-threonine protein kinase, plant-type               | serine-threonine protein kinase, plant-type, putative [Ricinus communis]<br>gij 223549901 gb EEF51388.1 | Under Expressed | D24 |
| s00053g05391 | -1,091 | 0,000 | auxin-responsive protein IAA27                            | Auxin-responsive protein IAA27 [Morus notabilis]                                                        | Under Expressed | D24 |
| s00384g17299 | -1,087 | 0,005 | elongator complex protein 5-like                          | PREDICTED: elongator complex protein 5-like [Citrus sinensis]                                           | Under Expressed | D24 |
| s00030g03636 | -1,087 | 0,020 | PRA1 family protein B4                                    | PREDICTED: PRA1 family protein B4 [Malus domestica]                                                     | Under Expressed | D24 |
| s08986g32819 | -1,087 | 0,037 | -                                                         | ***** No hits found *****                                                                               | Under Expressed | D24 |
| s00586g21128 | -1,086 | 0,001 | RING-H2 finger protein ATL13                              | RING-H2 finger protein ATL13 [Morus notabilis]                                                          | Under Expressed | D24 |
| s00756g23472 | -1,086 | 0,013 | -                                                         | SAUR-like auxin-responsive protein family [Theobroma cacao]                                             | Under Expressed | D24 |
| s00217g12920 | -1,083 | 0,024 | -                                                         | Protein ETHYLENE INSENSITIVE 3 [Morus notabilis]                                                        | Under Expressed | D24 |
| s00225g13184 | -1,083 | 0,001 | arogenate dehydratase/prephenate dehydratase 6            | Arogenate dehydratase/prephenate dehydratase 6 [Morus notabilis]                                        | Under Expressed | D24 |
| s10351g33151 | -1,074 | 0,050 | fructokinase-4                                            | putative fructokinase-4 [Morus notabilis]                                                               | Under Expressed | D24 |
| s00252g13966 | -1,069 | 0,001 | -                                                         | protein phosphatase-2c, putative [Ricinus communis]                                                     | Under Expressed | D24 |
| s00382g17278 | -1,068 | 0,008 | chaperone protein ClpB3, chloroplastic                    | PREDICTED: chaperone protein ClpB3, chloroplastic [Malus domestica]                                     | Under Expressed | D24 |
| s00743g23313 | -1,065 | 0,000 | amidophosphoribosyltransferase                            | Amidophosphoribosyltransferase [Morus notabilis]                                                        | Under Expressed | D24 |

|              |        |       |                                                               |                                                                                                             |                 |     |
|--------------|--------|-------|---------------------------------------------------------------|-------------------------------------------------------------------------------------------------------------|-----------------|-----|
| s00141g10115 | -1,065 | 0,001 | solute carrier family 35 member F1-like                       | PREDICTED: solute carrier family 35 member F1-like [Prunus mume]                                            | Under Expressed | D24 |
| s00021g02844 | -1,064 | 0,001 | -                                                             | PREDICTED: protein REVERSION-TO-ETHYLENE SENSITIVITY1 [Prunus mume]                                         | Under Expressed | D24 |
| s00314g15630 | -1,063 | 0,024 | auxin:hydrogen symporter                                      | auxin:hydrogen symporter, putative [Ricinus communis]                                                       | Under Expressed | D24 |
| s00068g06434 | -1,063 | 0,000 | cellulase protein                                             | Cellulase protein [Theobroma cacao] gij508708807[gb EOY00704.1]                                             | Under Expressed | D24 |
| s00076g06936 | -1,062 | 0,023 | ubiquitin-conjugating enzyme E2-17 kDa                        | PREDICTED: ubiquitin-conjugating enzyme E2-17 kDa [Sesamum indicum]                                         | Under Expressed | D24 |
| s00314g15629 | -1,061 | 0,008 | -                                                             | Uncharacterized transporter [Morus notabilis]                                                               | Under Expressed | D24 |
| s00344g16346 | -1,058 | 0,007 | similar to L484_028070                                        | ### Not characterized<br>###:hypothetical protein L484_028070 [Morus notabilis]                             | Under Expressed | D24 |
| s00013g01905 | -1,056 | 0,020 | baculoviral IAP repeat-containing protein 7-A                 | Baculoviral IAP repeat-containing protein 7-A [Morus notabilis]                                             | Under Expressed | D24 |
| s00029g03595 | -1,054 | 0,006 | -                                                             | PREDICTED: protein EXORDIUM-like 2 [Populus euphratica]                                                     | Under Expressed | D24 |
| s00490g19494 | -1,053 | 0,022 | G-type lectin S-receptor-like serine/threonine-protein kinase | G-type lectin S-receptor-like serine/threonine-protein kinase [Morus notabilis] gij587867998[gb EXB57371.1] | Under Expressed | D24 |
| s00028g03511 | -1,050 | 0,011 | sericin-2                                                     | PREDICTED: sericin-2 [Prunus mume]                                                                          | Under Expressed | D24 |
| s00028g03464 | -1,047 | 0,000 | aspartic proteinase nepenthesin-2                             | Aspartic proteinase nepenthesin-2 [Morus notabilis]                                                         | Under Expressed | D24 |
| s00530g20219 | -1,043 | 0,019 | CBL-interacting serine/threonine-protein kinase 11            | CBL-interacting serine/threonine-protein kinase 11 [Morus notabilis] gij587932508[gb EXC19556.1]            | Under Expressed | D24 |
| s00477g19236 | -1,029 | 0,044 | -                                                             | Calcium-dependent lipid-binding family protein, putative [Theobroma cacao] gij508711108[gb EOY03005.1]      | Under Expressed | D24 |
| s00351g16516 | -1,028 | 0,006 | LRR receptor-like serine/threonine-protein kinase At4g36180   | PREDICTED: probable LRR receptor-like serine/threonine-protein kinase At4g36180 [Malus domestica]           | Under Expressed | D24 |
| s00274g14555 | -1,025 | 0,000 | ribose-phosphate pyrophosphokinase 1                          | Ribose-phosphate pyrophosphokinase 1 [Morus notabilis]                                                      | Under Expressed | D24 |
| s00253g13994 | -1,025 | 0,024 | -                                                             | PREDICTED: protein NDR1-like [Fragaria vesca subsp. vesca]                                                  | Under Expressed | D24 |
| s00044g04757 | -1,023 | 0,000 | aluminum induced protein with YGL and LRDR motifs             | Aluminum induced protein with YGL and LRDR motifs [Theobroma cacao]                                         | Under Expressed | D24 |
| s00242g13685 | -1,021 | 0,039 | epoxide hydrolase 3-like                                      | PREDICTED: epoxide hydrolase 3-like [Malus domestica]                                                       | Under Expressed | D24 |

|              |        |       |                                                                          |                                                                                                                   |                 |     |
|--------------|--------|-------|--------------------------------------------------------------------------|-------------------------------------------------------------------------------------------------------------------|-----------------|-----|
| s00122g09302 | -1,019 | 0,004 | U-box domain-containing protein 16                                       | U-box domain-containing protein 16 [Morus notabilis]                                                              | Under Expressed | D24 |
| s00537g20337 | -1,017 | 0,040 | cellulose-synthase-like C5                                               | Cellulose-synthase-like C5 [Theobroma cacao]                                                                      | Under Expressed | D24 |
| s00657g22213 | -1,010 | 0,050 | hydroxycinnamoyl-Coenzyme A shikimate/quinat hydroxycinnamoyltransferase | Hydroxycinnamoyl-Coenzyme A shikimate/quinat hydroxycinnamoyltransferase [Morus notabilis]                        | Under Expressed | D24 |
| s00606g21470 | -1,010 | 0,016 | -                                                                        | PREDICTED: probable LRR receptor-like serine/threonine-protein kinase At1g53430-like isoform X5 [Citrus sinensis] | Under Expressed | D24 |
| s00975g25808 | -1,010 | 0,019 | UPF0481 protein At3g47200-like                                           | PREDICTED: UPF0481 protein At3g47200-like [Sesamum indicum]                                                       | Under Expressed | D24 |
| s16858g34475 | -1,010 | 0,001 | GDSL esterase/lipase 1                                                   | GDSL esterase/lipase 1 [Morus notabilis]                                                                          | Under Expressed | D24 |
| s00077g07008 | -1,008 | 0,042 | transcription factor RF2b                                                | Transcription factor RF2b [Morus notabilis]                                                                       | Under Expressed | D24 |
| s00365g16891 | -1,003 | 0,001 | mitochondrial substrate carrier family protein P                         | PREDICTED: mitochondrial substrate carrier family protein P [Prunus mume]                                         | Under Expressed | D24 |
| s00694g22691 | 5,585  | 0,000 | -                                                                        | ### Not characterized<br>###:hypothetical protein PRUPE_ppa023320mg [Prunus persica]                              | Over Expressed  | D48 |
| s00067g06362 | 5,347  | 0,020 | -                                                                        | PREDICTED: non-specific lipid-transfer protein 2-like [Cucumis melo]                                              | Over Expressed  | D48 |
| s00046g04909 | 4,988  | 0,000 | cytochrome P450 78A3                                                     | Cytochrome P450 78A3 [Morus notabilis] gi 587895348 gb EXB83849.1                                                 | Over Expressed  | D48 |
| s00614g21595 | 4,905  | 0,008 | auxin-induced protein 5NG4                                               | Auxin-induced protein 5NG4 [Morus notabilis]                                                                      | Over Expressed  | D48 |
| s00385g17333 | 4,767  | 0,002 | -                                                                        | PREDICTED: mybfamily transcription factor APL-like isoform X2 [Prunus mume]                                       | Over Expressed  | D48 |
| s00374g17096 | 4,509  | 0,046 | -                                                                        | ### Not characterized<br>###:PREDICTED: uncharacterized protein LOC101293734 [Fragaria vesca subsp. vesca]        | Over Expressed  | D48 |
| s00442g18535 | 4,487  | 0,000 | RING-H2 finger protein ATL66                                             | RING-H2 finger protein ATL66 [Morus notabilis]                                                                    | Over Expressed  | D48 |
| s17202g34542 | 4,465  | 0,048 | -                                                                        | **** No hits found ****                                                                                           | Over Expressed  | D48 |
| s00019g02612 | 4,370  | 0,004 | -                                                                        | PREDICTED: pathogenesis-related protein 1A-like [Eucalyptus grandis]                                              | Over Expressed  | D48 |
| s07957g32556 | 4,346  | 0,013 | -                                                                        | Cytochrome P450 [Morus notabilis] gi 587893952 gb EXB82484.1                                                      | Over Expressed  | D48 |
| s00439g18470 | 4,229  | 0,005 | -                                                                        | Vicilin-like antimicrobial peptides 2-2 [Morus notabilis]                                                         | Over Expressed  | D48 |
| s00756g23469 | 4,229  | 0,000 | glucose-1-phosphate adenyltransferase large subunit 3                    | Glucose-1-phosphate adenyltransferase large subunit 3 [Morus notabilis] gi 587846684 gb EXB37149.1                | Over Expressed  | D48 |
| s18644g34804 | 4,216  | 0,016 | -                                                                        | **** No hits found ****                                                                                           | Over Expressed  | D48 |
| s03046g31144 | 4,209  | 0,047 | pirin-like protein                                                       | PREDICTED: pirin-like protein [Glycine max]                                                                       | Over Expressed  | D48 |

|              |       |       |                                                       |                                                                                                                        |                |     |
|--------------|-------|-------|-------------------------------------------------------|------------------------------------------------------------------------------------------------------------------------|----------------|-----|
| s00046g04958 | 4,199 | 0,000 | -                                                     | Histone deacetylase 18 -like protein [Gossypium arboreum]                                                              | Over Expressed | D48 |
| s21650g35284 | 4,165 | 0,000 | -                                                     | **** No hits found ****                                                                                                | Over Expressed | D48 |
| s17173g34534 | 3,967 | 0,029 | -                                                     | ### Not characterized<br>###:hypothetical protein VITISV_022441 [Vitis vinifera]                                       | Over Expressed | D48 |
| s00099g08224 | 3,906 | 0,001 | CAP160 protein                                        | CAP160 protein, putative [Theobroma cacao]                                                                             | Over Expressed | D48 |
| s01243g27792 | 3,761 | 0,000 | -                                                     | PREDICTED: wall-associated receptor kinase-like 22 [Prunus mume]                                                       | Over Expressed | D48 |
| s00616g21632 | 3,743 | 0,000 | delta-1-pyrroline-5-carboxylate synthase              | Delta-1-pyrroline-5-carboxylate synthase [Morus notabilis]                                                             | Over Expressed | D48 |
| s00197g12247 | 3,709 | 0,002 | -                                                     | **** No hits found ****                                                                                                | Over Expressed | D48 |
| s00197g12257 | 3,609 | 0,041 | fatty acyl-CoA reductase 3                            | Fatty acyl-CoA reductase 3 [Morus notabilis]                                                                           | Over Expressed | D48 |
| s00768g23620 | 3,596 | 0,003 | AC093178_1 Putative polyprotein                       | AC093178_1 Putative polyprotein [Oryza sativa Japonica Group]                                                          | Over Expressed | D48 |
| s13193g33777 | 3,579 | 0,046 | cytochrome P450 71A1                                  | Cytochrome P450 71A1 [Morus notabilis] gj 587906393 gb EXB94465.1                                                      | Over Expressed | D48 |
| s00065g06261 | 3,514 | 0,000 | EID1-like F-box protein 3                             | PREDICTED: EID1-like F-box protein 3 [Vitis vinifera]                                                                  | Over Expressed | D48 |
| s00785g23824 | 3,508 | 0,000 | isoflavone 2'-hydroxylase                             | Isoflavone 2'-hydroxylase [Morus notabilis]                                                                            | Over Expressed | D48 |
| s00018g02534 | 3,504 | 0,001 | -                                                     | PREDICTED: putative late blight resistance protein homolog R1B-19 [Populus euphratica] gj 743852780 ref XP_011029353.1 | Over Expressed | D48 |
| s15768g34268 | 3,487 | 0,013 | copper-transporting ATPase 3                          | Putative copper-transporting ATPase 3 [Morus notabilis]                                                                | Over Expressed | D48 |
| s00068g06438 | 3,473 | 0,000 | cytochrome P450                                       | Cytochrome P450 [Morus notabilis] gj 587893952 gb EXB82484.1                                                           | Over Expressed | D48 |
| s00773g23687 | 3,464 | 0,007 | polyprotein                                           | polyprotein [Ananas comosus]                                                                                           | Over Expressed | D48 |
| s00579g21049 | 3,460 | 0,007 | -                                                     | **** No hits found ****                                                                                                | Over Expressed | D48 |
| s00158g10845 | 3,449 | 0,030 | similar to L484_015065                                | ### Not characterized<br>###:hypothetical protein L484_015065 [Morus notabilis]                                        | Over Expressed | D48 |
| s00002g00406 | 3,441 | 0,000 | serine/arginine repetitive matrix protein 2 isoform 1 | Serine/arginine repetitive matrix protein 2 isoform 1 [Theobroma cacao] gj 508702714 gb EOX94610.1                     | Over Expressed | D48 |
| s01136g27085 | 3,293 | 0,013 | expansin-like protein                                 | Expansin-like protein [Morus notabilis] gj 587914306 gb EXC02085.1                                                     | Over Expressed | D48 |
| s00003g00605 | 3,252 | 0,000 | -                                                     | ### Not characterized<br>###:hypothetical protein L484_007652 [Morus notabilis]                                        | Over Expressed | D48 |

|              |       |       |                                                             |                                                                                                       |                |     |
|--------------|-------|-------|-------------------------------------------------------------|-------------------------------------------------------------------------------------------------------|----------------|-----|
| s00002g00421 | 3,172 | 0,000 | heat stress transcription factor A-6b                       | Heat stress transcription factor A-6b [Morus notabilis]                                               | Over Expressed | D48 |
| s00287g14908 | 3,153 | 0,000 | -                                                           | ***** No hits found *****                                                                             | Over Expressed | D48 |
| s21292g35232 | 3,141 | 0,006 | cytochrome P450 704C1-like                                  | PREDICTED: cytochrome P450 704C1-like [Pyrus x bretschneideri]                                        | Over Expressed | D48 |
| s00350g16497 | 3,140 | 0,040 | -                                                           | ***** No hits found *****                                                                             | Over Expressed | D48 |
| s01059g26534 | 3,130 | 0,047 | -                                                           | ***** No hits found *****                                                                             | Over Expressed | D48 |
| s03630g31324 | 3,037 | 0,040 | UDP-glycosyltransferase 87A1                                | UDP-glycosyltransferase 87A1 [Morus notabilis]                                                        | Over Expressed | D48 |
| s00509g19844 | 3,007 | 0,007 | -                                                           | ***** No hits found *****                                                                             | Over Expressed | D48 |
| s27004g36012 | 3,007 | 0,019 | -                                                           | Cellulose synthase family protein isoform 1 [Theobroma cacao]                                         | Over Expressed | D48 |
| s00036g04168 | 2,969 | 0,020 | -                                                           | Putative Myb family transcription factor [Morus notabilis]                                            | Over Expressed | D48 |
| s00139g10024 | 2,965 | 0,000 | highly ABA-induced PP2C gene 2 isoform 1                    | Highly ABA-induced PP2C gene 2 isoform 1 [Theobroma cacao]                                            | Over Expressed | D48 |
| s00609g21528 | 2,959 | 0,000 | delta-1-pyrroline-5-carboxylate synthase                    | Delta-1-pyrroline-5-carboxylate synthase [Morus notabilis]                                            | Over Expressed | D48 |
| s00006g01156 | 2,907 | 0,000 | UPF0392 protein RCOM_0530710                                | PREDICTED: UPF0392 protein RCOM_0530710 [Jatropha curcas]                                             | Over Expressed | D48 |
| s01689g29686 | 2,894 | 0,047 | -                                                           | ***** No hits found *****                                                                             | Over Expressed | D48 |
| s00488g19437 | 2,852 | 0,000 | uncharacterized membrane protein At3g27390 isoform X2       | PREDICTED: uncharacterized membrane protein At3g27390 isoform X2 [Gossypium raimondii]                | Over Expressed | D48 |
| s00243g13708 | 2,834 | 0,001 | 1-aminocyclopropane-1-carboxylate oxidase-1-like protein    | 1-aminocyclopropane-1-carboxylate oxidase-1-like protein [Morus notabilis] gi 587929255 gb EXC16422.1 | Over Expressed | D48 |
| s00362g16800 | 2,814 | 0,000 | AFP homolog 2                                               | PREDICTED: AFP homolog 2 [Prunus mume]                                                                | Over Expressed | D48 |
| s00351g16511 | 2,813 | 0,005 | acetyltransferase                                           | putative acetyltransferase [Morus notabilis]                                                          | Over Expressed | D48 |
| s00163g11009 | 2,781 | 0,017 | galactinol synthase 2-like                                  | PREDICTED: galactinol synthase 2-like [Fragaria vesca subsp. vesca]                                   | Over Expressed | D48 |
| s00350g16495 | 2,774 | 0,002 | inactive purple acid phosphatase 27                         | putative inactive purple acid phosphatase 27 [Morus notabilis]                                        | Over Expressed | D48 |
| s00005g00867 | 2,755 | 0,013 | -                                                           | PREDICTED: protein SRG1 [Fragaria vesca subsp. vesca]                                                 | Over Expressed | D48 |
| s00551g20581 | 2,744 | 0,008 | similar to VITISV_024746                                    | ### Not characterized<br>###:hypothetical protein VITISV_024746 [Vitis vinifera]                      | Over Expressed | D48 |
| s00713g22919 | 2,691 | 0,013 | galactinol--sucrose galactosyltransferase 2-like isoform X1 | PREDICTED: probable galactinol--sucrose galactosyltransferase 2-like isoform X1 [Citrus sinensis]     | Over Expressed | D48 |
| s00515g19963 | 2,677 | 0,000 | formimidoyltransferase-cyclodeaminase-like                  | PREDICTED: formimidoyltransferase-cyclodeaminase-like [Prunus mume]                                   | Over Expressed | D48 |

|              |       |       |                                           |                                                                                      |                   |     |
|--------------|-------|-------|-------------------------------------------|--------------------------------------------------------------------------------------|-------------------|-----|
| s00087g07586 | 2,671 | 0,000 | unnamed protein product                   | ### Not characterized<br>###:unnamed protein product<br>[Coffea canephora]           | Over<br>Expressed | D48 |
| s00044g04765 | 2,671 | 0,001 | -                                         | **** No hits found ****                                                              | Over<br>Expressed | D48 |
| s00046g04956 | 2,668 | 0,000 | pleiotropic drug resistance protein 1     | Pleiotropic drug resistance protein 1 [Morus notabilis]                              | Over<br>Expressed | D48 |
| s00010g01651 | 2,654 | 0,005 | serine/threonine-protein kinase nek3-like | PREDICTED: probable serine/threonine-protein kinase nek3-like [Citrus sinensis]      | Over<br>Expressed | D48 |
| s10943g33294 | 2,616 | 0,000 | dnaJ homolog subfamily B member 8-like    | PREDICTED: dnaJ homolog subfamily B member 8-like [Pyrus x bretschneideri]           | Over<br>Expressed | D48 |
| s00196g12215 | 2,614 | 0,038 | -                                         | **** No hits found ****                                                              | Over<br>Expressed | D48 |
| s00840g24420 | 2,607 | 0,040 | -                                         | **** No hits found ****                                                              | Over<br>Expressed | D48 |
| s00983g25879 | 2,586 | 0,000 | -                                         | ### Not characterized<br>###:hypothetical protein<br>L484_004442 [Morus notabilis]   | Over<br>Expressed | D48 |
| s00496g19604 | 2,554 | 0,036 | bidirectional sugar transporter SWEET16   | Bidirectional sugar transporter SWEET16 [Morus notabilis]                            | Over<br>Expressed | D48 |
| s00456g18824 | 2,538 | 0,017 | -                                         | ### Not characterized<br>###:hypothetical protein<br>L484_002641 [Morus notabilis]   | Over<br>Expressed | D48 |
| s00001g00053 | 2,530 | 0,017 | -                                         | PREDICTED: uncharacterized mitochondrial protein AtMg00810-like [Glycine max]        | Over<br>Expressed | D48 |
| s00124g09364 | 2,530 | 0,015 | E3 ubiquitin-protein ligase listerin      | E3 ubiquitin-protein ligase listerin [Morus notabilis]                               | Over<br>Expressed | D48 |
| s00045g04880 | 2,523 | 0,000 | serine/threonine-protein kinase SMG1      | Serine/threonine-protein kinase SMG1 [Morus notabilis]                               | Over<br>Expressed | D48 |
| s00032g03821 | 2,502 | 0,000 | glucanase like protein                    | Glucanase like protein [Theobroma cacao]                                             | Over<br>Expressed | D48 |
| s01232g27721 | 2,491 | 0,004 | -                                         | PREDICTED: protein ZINC INDUCED FACILITATOR-LIKE 1-like isoform X2 [Malus domestica] | Over<br>Expressed | D48 |
| s00256g14057 | 2,480 | 0,001 | -                                         | PREDICTED: protein TRANSPARENT TESTA 12-like [Pyrus x bretschneideri]                | Over<br>Expressed | D48 |
| s00814g24153 | 2,470 | 0,000 | sugar transporter ERD6-like 6             | Sugar transporter ERD6-like 6 [Morus notabilis]                                      | Over<br>Expressed | D48 |
| s00587g21137 | 2,470 | 0,000 | -                                         | PREDICTED: putative disease resistance protein RGA3 [Jatropha curcas]                | Over<br>Expressed | D48 |
| s11955g33520 | 2,465 | 0,003 | -                                         | cinnamate beta-D-glucosyltransferase-like [Vitis vinifera]                           | Over<br>Expressed | D48 |
| s00599g21349 | 2,460 | 0,008 | -                                         | ### Not characterized<br>###:hypothetical protein<br>L484_011011 [Morus notabilis]   | Over<br>Expressed | D48 |
| s00006g01064 | 2,458 | 0,001 | raffinose synthase family protein         | Raffinose synthase family protein [Theobroma cacao]                                  | Over<br>Expressed | D48 |

|              |       |       |                                                               |                                                                                                                      |                |     |
|--------------|-------|-------|---------------------------------------------------------------|----------------------------------------------------------------------------------------------------------------------|----------------|-----|
| s15417g34205 | 2,452 | 0,007 | -                                                             | PREDICTED: protein GLUTAMINE DUMPER 6-like [Malus domestica]                                                         | Over Expressed | D48 |
| s00294g15096 | 2,444 | 0,008 | tetraspanin-19-like isoform X2                                | PREDICTED: tetraspanin-19-like isoform X2 [Prunus mume]                                                              | Over Expressed | D48 |
| s00187g11925 | 2,435 | 0,000 | alanine-glyoxylate aminotransferase                           | alanine-glyoxylate aminotransferase, putative [Ricinus communis]                                                     | Over Expressed | D48 |
| s00068g06468 | 2,434 | 0,037 | similar to L484_019165                                        | ### Not characterized<br>###:hypothetical protein L484_019165 [Morus notabilis]                                      | Over Expressed | D48 |
| s24576g35699 | 2,433 | 0,043 | -                                                             | ### Not characterized<br>###:PREDICTED: uncharacterized protein LOC105852868 [Cicer arietinum]                       | Over Expressed | D48 |
| s00786g23838 | 2,414 | 0,000 | subtilisin-like protease                                      | Subtilisin-like protease [Morus notabilis]                                                                           | Over Expressed | D48 |
| s02848g31082 | 2,413 | 0,000 | -                                                             | **** No hits found ****                                                                                              | Over Expressed | D48 |
| s00759g23503 | 2,402 | 0,000 | -                                                             | PREDICTED: protein YLS9 [Gossypium raimondii]                                                                        | Over Expressed | D48 |
| s00405g17768 | 2,400 | 0,007 | -                                                             | ### Not characterized<br>###:hypothetical protein L484_020052 [Morus notabilis]                                      | Over Expressed | D48 |
| s00041g04555 | 2,391 | 0,001 | pre-mRNA cleavage complex 2 protein Pcf11, putative isoform 2 | Pre-mRNA cleavage complex 2 protein Pcf11, putative isoform 2 [Theobroma cacao] gj 508779462 gb EOY26718.1           | Over Expressed | D48 |
| s00405g17769 | 2,387 | 0,008 | -                                                             | **** No hits found ****                                                                                              | Over Expressed | D48 |
| s00124g09408 | 2,371 | 0,024 | uncharacterized protein LOC103329980                          | ### Not characterized<br>###:PREDICTED: uncharacterized protein LOC103329980 [Prunus mume]                           | Over Expressed | D48 |
| s00637g21925 | 2,360 | 0,000 | -                                                             | PREDICTED: U4/U6.U5 tri-snRNP-associated protein 1-like [Malus domestica] gj 657997037 ref XP_008390896.1            | Over Expressed | D48 |
| s00404g17739 | 2,353 | 0,007 | inactive leucine-rich repeat receptor-like protein kinase     | putative inactive leucine-rich repeat receptor-like protein kinase [Morus notabilis] gj 587909790 gb EXB97691.1      | Over Expressed | D48 |
| s00418g18055 | 2,336 | 0,001 | S-type anion channel SLAH3                                    | S-type anion channel SLAH3 [Morus notabilis]                                                                         | Over Expressed | D48 |
| s00571g20919 | 2,331 | 0,004 | atrophin-1                                                    | PREDICTED: LOW QUALITY PROTEIN: atrophin-1 [Cucumis melo]                                                            | Over Expressed | D48 |
| s11929g33509 | 2,305 | 0,000 | -                                                             | PREDICTED: protein ECERIFERUM 1-like, partial [Prunus mume]                                                          | Over Expressed | D48 |
| s00320g15804 | 2,297 | 0,000 | glycosyltransferase-like At2g41451                            | PREDICTED: glycosyltransferase-like At2g41451 [Nelumbo nucifera]                                                     | Over Expressed | D48 |
| s00322g15855 | 2,290 | 0,010 | -                                                             | ### Not characterized<br>###:hypothetical protein L484_003435 [Morus notabilis]                                      | Over Expressed | D48 |
| s00154g10671 | 2,288 | 0,002 | pentatricopeptide repeat-containing protein At3g47840         | PREDICTED: putative pentatricopeptide repeat-containing protein At3g47840 [Pyrus x bretschneideri]                   | Over Expressed | D48 |
| s13183g33771 | 2,271 | 0,000 | -                                                             | PREDICTED: probable cytokinin riboside 5'-monophosphate phosphoribohydrolase LOGL1-like isoform X2 [Citrus sinensis] | Over Expressed | D48 |

|              |       |       |                                                                    |                                                                                                              |                   |     |
|--------------|-------|-------|--------------------------------------------------------------------|--------------------------------------------------------------------------------------------------------------|-------------------|-----|
| s25457g35803 | 2,260 | 0,039 | similar to L484_005846                                             | ### Not characterized<br>###:hypothetical protein<br>L484_005846 [Morus notabilis]                           | Over<br>Expressed | D48 |
| s02187g30660 | 2,230 | 0,002 | uncharacterized protein<br>LOC102631362                            | ### Not characterized<br>###:PREDICTED: uncharacterized<br>protein LOC102631362 [Citrus<br>sinensis]         | Over<br>Expressed | D48 |
| s18780g34821 | 2,186 | 0,004 | glucan endo-1,3-beta-glucosidase<br>isoform X1                     | PREDICTED: glucan endo-1,3-<br>beta-glucosidase isoform X1<br>[Jatropha curcas]                              | Over<br>Expressed | D48 |
| s05386g31855 | 2,176 | 0,000 | -                                                                  | PREDICTED: probable cytokinin<br>riboside 5'-monophosphate<br>phosphoribohydrolase LOGL1<br>[Vitis vinifera] | Over<br>Expressed | D48 |
| s00590g21184 | 2,175 | 0,003 | similar to VITISV_024814                                           | ### Not characterized<br>###:hypothetical protein<br>VITISV_024814 [Vitis vinifera]                          | Over<br>Expressed | D48 |
| s00478g19250 | 2,150 | 0,050 | gibberellin 2-beta-dioxygenase 1                                   | Gibberellin 2-beta-dioxygenase 1<br>[Morus notabilis]                                                        | Over<br>Expressed | D48 |
| s10712g33237 | 2,137 | 0,012 | -                                                                  | **** No hits found ****                                                                                      | Over<br>Expressed | D48 |
| s02091g30514 | 2,133 | 0,000 | -                                                                  | PREDICTED: cytokinin riboside 5'-<br>monophosphate<br>phosphoribohydrolase LOG8-like<br>[Prunus mume]        | Over<br>Expressed | D48 |
| s00165g11095 | 2,132 | 0,008 | -                                                                  | ### Not characterized<br>###:hypothetical protein<br>L484_012154 [Morus notabilis]                           | Over<br>Expressed | D48 |
| s00030g03632 | 2,123 | 0,036 | alpha-aminoadipic semialdehyde<br>synthase                         | Alpha-aminoadipic semialdehyde<br>synthase [Morus notabilis]                                                 | Over<br>Expressed | D48 |
| s00308g15457 | 2,120 | 0,000 | -                                                                  | **** No hits found ****                                                                                      | Over<br>Expressed | D48 |
| s00199g12310 | 2,110 | 0,000 | mitogen-activated protein kinase<br>kinase kinase 2                | Mitogen-activated protein kinase<br>kinase kinase 2 [Morus notabilis]                                        | Over<br>Expressed | D48 |
| s07887g32536 | 2,098 | 0,000 | uncharacterized protein<br>LOC104877618                            | ### Not characterized<br>###:PREDICTED: uncharacterized<br>protein LOC104877618 [Vitis<br>vinifera]          | Over<br>Expressed | D48 |
| s00287g14905 | 2,091 | 0,000 | -                                                                  | **** No hits found ****                                                                                      | Over<br>Expressed | D48 |
| s10042g33077 | 2,089 | 0,037 | cellulose synthase-like protein G2                                 | Cellulose synthase-like protein G2<br>[Morus notabilis]                                                      | Over<br>Expressed | D48 |
| s00006g01145 | 2,077 | 0,001 | -                                                                  | ### Not characterized<br>###:hypothetical protein<br>PRUPE_ppa018289mg [Prunus<br>persica]                   | Over<br>Expressed | D48 |
| s00681g22514 | 2,074 | 0,015 | cytochrome P450 78A4                                               | Cytochrome P450 78A4 [Morus<br>notabilis]<br>gi 587838212 gb EXB28925.1                                      | Over<br>Expressed | D48 |
| s00022g02925 | 2,062 | 0,021 | polygalacturonase                                                  | Polygalacturonase [Morus<br>notabilis]<br>gi 587904952 gb EXB93148.1                                         | Over<br>Expressed | D48 |
| s00287g14906 | 2,054 | 0,000 | RING fingerand CHY zinc finger<br>domain-containing protein 1-like | PREDICTED: RING fingerand CHY<br>zinc finger domain-containing<br>protein 1-like [Eucalyptus grandis]        | Over<br>Expressed | D48 |
| s00247g13804 | 2,048 | 0,014 | E3 ubiquitin-protein ligase<br>RHA2A                               | E3 ubiquitin-protein ligase RHA2A<br>[Morus notabilis]                                                       | Over<br>Expressed | D48 |
| s00305g15382 | 2,014 | 0,008 | similar to L484_010847                                             | ### Not characterized<br>###:hypothetical protein<br>L484_010847 [Morus notabilis]                           | Over<br>Expressed | D48 |



|              |       |       |                                                                               |                                                                                                        |                |     |
|--------------|-------|-------|-------------------------------------------------------------------------------|--------------------------------------------------------------------------------------------------------|----------------|-----|
| s00083g07387 | 2,003 | 0,000 | UDP-glycosyltransferase 73C3                                                  | UDP-glycosyltransferase 73C3 [Morus notabilis]                                                         | Over Expressed | D48 |
| s00557g20673 | 2,000 | 0,022 | -                                                                             | PREDICTED: protein ECERIFERUM 1-like [Prunus mume]                                                     | Over Expressed | D48 |
| s00120g09218 | 1,997 | 0,043 | -                                                                             | ### Not characterized<br>###:hypothetical protein PRUPE_ppa016191mg [Prunus persica]                   | Over Expressed | D48 |
| s00444g18584 | 1,987 | 0,000 | similar to L484_000375                                                        | ### Not characterized<br>###:hypothetical protein L484_000375 [Morus notabilis]                        | Over Expressed | D48 |
| s00021g02872 | 1,985 | 0,020 | thromboxane-A synthase                                                        | Thromboxane-A synthase [Morus notabilis]                                                               | Over Expressed | D48 |
| s01069g26609 | 1,978 | 0,001 | 4-alpha-glucanotransferase DPE2                                               | 4-alpha-glucanotransferase DPE2 [Morus notabilis]                                                      | Over Expressed | D48 |
| s00628g21805 | 1,961 | 0,008 | similar to L484_006153                                                        | ### Not characterized<br>###:hypothetical protein L484_006153 [Morus notabilis]                        | Over Expressed | D48 |
| s21629g35283 | 1,959 | 0,021 | -                                                                             | ### Not characterized<br>###:hypothetical protein VITISV_041073 [Vitis vinifera]                       | Over Expressed | D48 |
| s00331g16057 | 1,953 | 0,000 | serine/threonine-protein kinase SAPK3 isoform 2                               | Serine/threonine-protein kinase SAPK3 isoform 2, partial [Theobroma cacao] gij508776903[gb EOY24159.1] | Over Expressed | D48 |
| s00287g14907 | 1,949 | 0,000 | -                                                                             | **** No hits found ****                                                                                | Over Expressed | D48 |
| s00749g23397 | 1,946 | 0,000 | cytochrome P450                                                               | Cytochrome P450 [Morus notabilis] gij587886359[gb EXB75164.1]                                          | Over Expressed | D48 |
| s00611g21551 | 1,944 | 0,000 | -                                                                             | **** No hits found ****                                                                                | Over Expressed | D48 |
| s00614g21603 | 1,943 | 0,000 | -                                                                             | PREDICTED: protein ALTERED XYLOGLUCAN 4-like [Prunus mume]                                             | Over Expressed | D48 |
| s00187g11939 | 1,942 | 0,000 | NAC domain-containing protein 72                                              | NAC domain-containing protein 72 [Morus notabilis]                                                     | Over Expressed | D48 |
| s08382g32673 | 1,938 | 0,034 | -                                                                             | **** No hits found ****                                                                                | Over Expressed | D48 |
| s00030g03631 | 1,930 | 0,036 | lysine-ketoglutarate reductase/saccharopine dehydrogenase bifunctional enzyme | Lysine-ketoglutarate reductase/saccharopine dehydrogenase bifunctional enzyme [Theobroma cacao]        | Over Expressed | D48 |
| s00479g19278 | 1,930 | 0,000 | purple acid phosphatase 3                                                     | Purple acid phosphatase 3 [Morus notabilis]                                                            | Over Expressed | D48 |
| s00136g09906 | 1,919 | 0,015 | two-component response regulator-like protein                                 | Two-component response regulator-like protein [Morus notabilis]                                        | Over Expressed | D48 |
| s00046g04905 | 1,910 | 0,033 | -                                                                             | **** No hits found ****                                                                                | Over Expressed | D48 |
| s00151g10569 | 1,908 | 0,006 | purple acid phosphatase 25                                                    | Purple acid phosphatase 25 [Morus notabilis]                                                           | Over Expressed | D48 |
| s00207g12577 | 1,908 | 0,031 | myb-related protein 305                                                       | Myb-related protein 305 [Morus notabilis]                                                              | Over Expressed | D48 |
| s00232g13400 | 1,902 | 0,000 | -                                                                             | **** No hits found ****                                                                                | Over Expressed | D48 |
| s00101g08271 | 1,884 | 0,004 | glycerol-3-phosphate transporter 4                                            | Putative glycerol-3-phosphate transporter 4 [Morus notabilis]                                          | Over Expressed | D48 |

|              |       |       |                                                                                             |                                                                                                                        |                |     |
|--------------|-------|-------|---------------------------------------------------------------------------------------------|------------------------------------------------------------------------------------------------------------------------|----------------|-----|
| s00261g14202 | 1,884 | 0,020 | acyl-protein thioesterase 2-like                                                            | PREDICTED: acyl-protein thioesterase 2-like [ <i>Populus euphratica</i> ]                                              | Over Expressed | D48 |
| s00194g12157 | 1,871 | 0,007 | -                                                                                           | PREDICTED: protein GLUTAMINE DUMPER 3-like [ <i>Malus domestica</i> ]                                                  | Over Expressed | D48 |
| s00027g03337 | 1,869 | 0,044 | similar to L484_015100                                                                      | ### Not characterized<br>###:hypothetical protein L484_015100 [ <i>Morus notabilis</i> ]                               | Over Expressed | D48 |
| s00017g02349 | 1,860 | 0,000 | tropinone reductase-like protein                                                            | Tropinone reductase-like protein [ <i>Morus notabilis</i> ]                                                            | Over Expressed | D48 |
| s01327g28237 | 1,852 | 0,000 | -                                                                                           | PREDICTED: proteasome activator subunit 4 [ <i>Solanum lycopersicum</i> ]                                              | Over Expressed | D48 |
| s01327g28234 | 1,848 | 0,000 | amino acid transporter                                                                      | amino acid transporter, putative [ <i>Ricinus communis</i> ]                                                           | Over Expressed | D48 |
| s01825g30051 | 1,843 | 0,000 | acetyltransferase                                                                           | putative acetyltransferase [ <i>Morus notabilis</i> ]                                                                  | Over Expressed | D48 |
| s00067g06403 | 1,831 | 0,007 | -                                                                                           | ### Not characterized<br>###:hypothetical protein L484_027125 [ <i>Morus notabilis</i> ]                               | Over Expressed | D48 |
| s00679g22491 | 1,828 | 0,000 | nuclear transcription factor Y subunit A-9                                                  | Nuclear transcription factor Y subunit A-9 [ <i>Morus notabilis</i> ]                                                  | Over Expressed | D48 |
| s00471g19142 | 1,826 | 0,000 | -                                                                                           | ### Not characterized<br>###:hypothetical protein B456_004G198900 [ <i>Gossypium raimondii</i> ]                       | Over Expressed | D48 |
| s00004g00666 | 1,820 | 0,000 | -                                                                                           | ***** No hits found *****                                                                                              | Over Expressed | D48 |
| s00384g17305 | 1,819 | 0,000 | abscisic acid-deficient 4                                                                   | Abscisic acid-deficient 4 [ <i>Theobroma cacao</i> ]                                                                   | Over Expressed | D48 |
| s02020g30426 | 1,817 | 0,000 | -                                                                                           | putative Ty1-copia-like retrotransposon [ <i>Cercis chinensis</i> ]                                                    | Over Expressed | D48 |
| s00020g02736 | 1,810 | 0,047 | serine/threonine-protein kinase WNK-related isoform 1                                       | Serine/threonine-protein kinase WNK-related isoform 1 [ <i>Theobroma cacao</i> ] gi 508722478 gb EOY14375.1            | Over Expressed | D48 |
| s00820g24228 | 1,801 | 0,026 | ripening-related protein-like                                                               | ripening-related protein-like [ <i>Vitis vinifera</i> ]                                                                | Over Expressed | D48 |
| s00821g24240 | 1,796 | 0,000 | inositol oxygenase 1-like isoform X1                                                        | PREDICTED: inositol oxygenase 1-like isoform X1 [ <i>Citrus sinensis</i> ]                                             | Over Expressed | D48 |
| s00008g01339 | 1,792 | 0,029 | -                                                                                           | ***** No hits found *****                                                                                              | Over Expressed | D48 |
| s00112g08814 | 1,781 | 0,001 | lipoamide acyltransferase component of branched-chain alpha-keto acid dehydrogenase complex | Lipoamide acyltransferase component of branched-chain alpha-keto acid dehydrogenase complex [ <i>Morus notabilis</i> ] | Over Expressed | D48 |
| s00125g09432 | 1,779 | 0,002 | esterase-like                                                                               | PREDICTED: LOW QUALITY PROTEIN: esterase-like [ <i>Prunus mume</i> ]                                                   | Over Expressed | D48 |
| s00043g04721 | 1,779 | 0,001 | -                                                                                           | ***** No hits found *****                                                                                              | Over Expressed | D48 |
| s00017g02409 | 1,771 | 0,000 | -                                                                                           | Glucan endo-1,3-beta-glucosidase [ <i>Morus notabilis</i> ]                                                            | Over Expressed | D48 |
| s00103g08372 | 1,768 | 0,000 | glutathione S-transferase                                                                   | PREDICTED: probable glutathione S-transferase [ <i>Prunus mume</i> ]                                                   | Over Expressed | D48 |

|              |       |       |                                                       |                                                                                                              |                |     |
|--------------|-------|-------|-------------------------------------------------------|--------------------------------------------------------------------------------------------------------------|----------------|-----|
| s00048g05051 | 1,768 | 0,020 | U-box domain-containing protein 20                    | U-box domain-containing protein 20 [Morus notabilis]                                                         | Over Expressed | D48 |
| s00789g23879 | 1,766 | 0,000 | similar to L484_003112                                | ### Not characterized<br>###:hypothetical protein<br>L484_003112 [Morus notabilis]                           | Over Expressed | D48 |
| s00595g21295 | 1,764 | 0,000 | monosaccharide-sensing protein 2                      | Monosaccharide-sensing protein 2 [Morus notabilis]                                                           | Over Expressed | D48 |
| s00156g10751 | 1,762 | 0,000 | syntaxin-binding protein 5                            | Syntaxin-binding protein 5 [Morus notabilis]                                                                 | Over Expressed | D48 |
| s00067g06394 | 1,760 | 0,000 | serine/threonine-protein kinase                       | Serine/threonine-protein kinase [Morus notabilis]                                                            | Over Expressed | D48 |
| s00368g16954 | 1,759 | 0,012 | translocator-like protein                             | Translocator-like protein [Morus notabilis]                                                                  | Over Expressed | D48 |
| s00099g08222 | 1,757 | 0,011 | interaptin                                            | PREDICTED: interaptin [Prunus mume]                                                                          | Over Expressed | D48 |
| s01339g28292 | 1,756 | 0,012 | -                                                     | **** No hits found ****                                                                                      | Over Expressed | D48 |
| s00258g14107 | 1,755 | 0,001 | -                                                     | ### Not characterized<br>###:hypothetical protein<br>L484_002671 [Morus notabilis]                           | Over Expressed | D48 |
| s06049g32019 | 1,752 | 0,040 | uncharacterized protein LOC104879739                  | ### Not characterized<br>###:PREDICTED: uncharacterized protein LOC104879739 [Vitis vinifera]                | Over Expressed | D48 |
| s00786g23837 | 1,749 | 0,001 | -                                                     | protein phosphatase 2c, putative [Ricinus communis]                                                          | Over Expressed | D48 |
| s00168g11211 | 1,733 | 0,026 | thiamine thiazole synthase 2                          | Thiamine thiazole synthase 2 [Morus notabilis]                                                               | Over Expressed | D48 |
| s00187g11938 | 1,733 | 0,005 | -                                                     | **** No hits found ****                                                                                      | Over Expressed | D48 |
| s00423g18151 | 1,732 | 0,000 | similar to L484_022081                                | ### Not characterized<br>###:hypothetical protein<br>L484_022081 [Morus notabilis]                           | Over Expressed | D48 |
| s00203g12451 | 1,720 | 0,033 | sulfate transporter 4.2                               | putative sulfate transporter 4.2 [Morus notabilis]                                                           | Over Expressed | D48 |
| s00038g04301 | 1,709 | 0,000 | leucine-rich repeat receptor protein kinase EXS       | Leucine-rich repeat receptor protein kinase EXS [Morus notabilis]                                            | Over Expressed | D48 |
| s00077g06986 | 1,698 | 0,023 | adenine/guanine permease AZG1                         | Adenine/guanine permease AZG1 [Morus notabilis]                                                              | Over Expressed | D48 |
| s00061g06023 | 1,689 | 0,003 | copper chaperonefor superoxide dismutase              | Copper chaperonefor superoxide dismutase [Morus notabilis]                                                   | Over Expressed | D48 |
| s00199g12309 | 1,685 | 0,004 | aspartic proteinase                                   | Aspartic proteinase [Morus notabilis]<br>gij 587888347 gb EXB77055.1                                         | Over Expressed | D48 |
| s24475g35680 | 1,684 | 0,001 | retrovirus-related Pol polyprotein                    | Retrovirus-related Pol polyprotein from transposon TNT 1-94 [Morus notabilis]<br>gij 587949157 gb EXC35359.1 | Over Expressed | D48 |
| s00004g00768 | 1,682 | 0,006 | glucose-1-phosphate adenylyltransferase large subunit | Glucose-1-phosphate adenylyltransferase large subunit [Morus notabilis]<br>gij 587938319 gb EXC25068.1       | Over Expressed | D48 |
| s01118g26941 | 1,675 | 0,012 | BTB/POZ domain-containing protein                     | BTB/POZ domain-containing protein [Morus notabilis]                                                          | Over Expressed | D48 |

|              |       |       |                                         |                                                                                                                                |                |     |
|--------------|-------|-------|-----------------------------------------|--------------------------------------------------------------------------------------------------------------------------------|----------------|-----|
| s03669g31340 | 1,671 | 0,000 | -                                       | PREDICTED: hippocampus abundant transcript-like protein 1 isoform X2 [Sesamum indicum] gij 747060950 ref XP_011076926.1        | Over Expressed | D48 |
| s00043g04722 | 1,670 | 0,000 | -                                       | NHX1 [Morus notabilis]                                                                                                         | Over Expressed | D48 |
| s00080g07237 | 1,667 | 0,001 | myosin heavy chain kinase B             | Myosin heavy chain kinase B [Morus notabilis]                                                                                  | Over Expressed | D48 |
| s00152g10615 | 1,656 | 0,000 | serine/threonine-protein kinase Nek7    | Serine/threonine-protein kinase Nek7 [Morus notabilis]                                                                         | Over Expressed | D48 |
| s00903g25127 | 1,649 | 0,012 | glycerol-3-phosphate acyltransferase    | glycerol-3-phosphate acyltransferase [Medicago truncatula]                                                                     | Over Expressed | D48 |
| s00181g11655 | 1,649 | 0,031 | -                                       | ### Not characterized<br>###:hypothetical protein L484_010593 [Morus notabilis]                                                | Over Expressed | D48 |
| s00017g02350 | 1,641 | 0,005 | -                                       | Tropinone reductase-like protein [Morus notabilis]                                                                             | Over Expressed | D48 |
| s00291g15026 | 1,639 | 0,040 | cytochrome P450 71D11-like              | PREDICTED: cytochrome P450 71D11-like [Fragaria vesca subsp. vesca]                                                            | Over Expressed | D48 |
| s00308g15456 | 1,638 | 0,001 | folate-biopterin transporter 7-like     | PREDICTED: probable folate-biopterin transporter 7-like [Citrus sinensis]                                                      | Over Expressed | D48 |
| s06168g32051 | 1,637 | 0,000 | -                                       | **** No hits found ****                                                                                                        | Over Expressed | D48 |
| s00982g25867 | 1,635 | 0,000 | -                                       | **** No hits found ****                                                                                                        | Over Expressed | D48 |
| s11820g33480 | 1,631 | 0,015 | -                                       | ### Not characterized<br>###:hypothetical protein POPTR_0001s42340g, partial [Populus trichocarpa] gij 550349590 gb ERP66980.1 | Over Expressed | D48 |
| s00038g04289 | 1,630 | 0,025 | serine/threonine-protein kinase         | putative serine/threonine-protein kinase [Morus notabilis]                                                                     | Over Expressed | D48 |
| s01290g28025 | 1,628 | 0,019 | similar to L484_016377                  | ### Not characterized<br>###:hypothetical protein L484_016377 [Morus notabilis]                                                | Over Expressed | D48 |
| s00423g18156 | 1,627 | 0,000 | alpha-glucan phosphorylase, H isozyme   | Alpha-glucan phosphorylase, H isozyme [Morus notabilis]                                                                        | Over Expressed | D48 |
| s00430g18286 | 1,626 | 0,002 | selenium-binding protein 2              | Selenium-binding protein 2 [Morus notabilis]                                                                                   | Over Expressed | D48 |
| s06985g32279 | 1,626 | 0,035 | acetyl-CoA carboxylase 1                | Acetyl-CoA carboxylase 1 [Morus notabilis]                                                                                     | Over Expressed | D48 |
| s00094g07955 | 1,626 | 0,029 | copper-transporting ATPase 3            | Putative copper-transporting ATPase 3 [Morus notabilis]                                                                        | Over Expressed | D48 |
| s01205g27550 | 1,624 | 0,004 | similar to L484_009885                  | ### Not characterized<br>###:hypothetical protein L484_009885 [Morus notabilis]                                                | Over Expressed | D48 |
| s00138g10001 | 1,620 | 0,000 | galacturonosyltransferase-like 9        | putative galacturonosyltransferase-like 9 [Morus notabilis]                                                                    | Over Expressed | D48 |
| s00746g23361 | 1,618 | 0,000 | myb domain protein 17 isoform 1         | Myb domain protein 17 isoform 1 [Theobroma cacao]                                                                              | Over Expressed | D48 |
| s00061g05989 | 1,611 | 0,042 | DNA-directed RNA polymerase D subunit 1 | DNA-directed RNA polymerase D subunit 1 [Morus notabilis]                                                                      | Over Expressed | D48 |
| s00017g02427 | 1,610 | 0,000 | E3 ubiquitin-protein ligase XBAT31      | Putative E3 ubiquitin-protein ligase XBAT31 [Morus notabilis]                                                                  | Over Expressed | D48 |
| s11486g33417 | 1,605 | 0,026 | disease resistance protein At3g14460    | PREDICTED: putative disease resistance protein At3g14460 [Pyrus x bretschneideri] gij 694392078 ref XP_009371531.1             | Over Expressed | D48 |

|              |       |       |                                                            |                                                                                                           |                |     |
|--------------|-------|-------|------------------------------------------------------------|-----------------------------------------------------------------------------------------------------------|----------------|-----|
| s00001g00008 | 1,602 | 0,007 | -                                                          | **** No hits found ****                                                                                   | Over Expressed | D48 |
| s00319g15780 | 1,599 | 0,001 | alpha-1,4 glucan phosphorylase L isozyme                   | Alpha-1,4 glucan phosphorylase L isozyme [Morus notabilis]                                                | Over Expressed | D48 |
| s00118g09118 | 1,598 | 0,000 | flavonoid 3-O-glucosyltransferase                          | flavonoid 3-O-glucosyltransferase, partial [Morus alba]                                                   | Over Expressed | D48 |
| s01118g26940 | 1,594 | 0,020 | BTB/POZ domain-containing protein                          | BTB/POZ domain-containing protein [Morus notabilis]                                                       | Over Expressed | D48 |
| s00212g12760 | 1,590 | 0,000 | phosphoenolpyruvate carboxylase                            | Phosphoenolpyruvate carboxylase [Morus notabilis]                                                         | Over Expressed | D48 |
| s00022g02966 | 1,587 | 0,008 | patatin group A-3                                          | Patatin group A-3 [Morus notabilis] gjj587904995 gb EXB93191.1]                                           | Over Expressed | D48 |
| s01401g28611 | 1,580 | 0,002 | 1-phosphatidylinositol phosphodiesterase                   | 1-phosphatidylinositol phosphodiesterase [Morus notabilis]                                                | Over Expressed | D48 |
| s02837g31079 | 1,574 | 0,001 | -                                                          | Selenium-binding protein 2 [Morus notabilis]                                                              | Over Expressed | D48 |
| s00041g04572 | 1,574 | 0,000 | mitochondrial carnitine/acylcarnitine carrier protein CACL | Mitochondrial carnitine/acylcarnitine carrier protein CACL [Morus notabilis] gjj587885639 gb EXB74496.1]  | Over Expressed | D48 |
| s00057g05768 | 1,569 | 0,000 | uncharacterized membrane protein                           | Uncharacterized membrane protein [Morus notabilis]                                                        | Over Expressed | D48 |
| s00015g02137 | 1,551 | 0,037 | MATE efflux family protein DTX1                            | MATE efflux family protein DTX1 [Morus notabilis]                                                         | Over Expressed | D48 |
| s02687g31017 | 1,550 | 0,001 | allantoate deiminase                                       | Allantoate deiminase [Morus notabilis] gjj587877959 gb EXB66978.1]                                        | Over Expressed | D48 |
| s00124g09363 | 1,542 | 0,038 | uncharacterized protein LOC102629445                       | ### Not characterized<br>###:PREDICTED: uncharacterized protein LOC102629445 [Citrus sinensis]            | Over Expressed | D48 |
| s00007g01172 | 1,541 | 0,000 | serine/threonine-protein kinase SRK2E                      | Serine/threonine-protein kinase SRK2E [Theobroma cacao]                                                   | Over Expressed | D48 |
| s00312g15567 | 1,530 | 0,000 | 1-aminocyclopropane-1-carboxylate oxidase homolog 1-like   | PREDICTED: 1-aminocyclopropane-1-carboxylate oxidase homolog 1-like [Malus domestica]                     | Over Expressed | D48 |
| s00037g04203 | 1,530 | 0,000 | formin-like protein 6                                      | Formin-like protein 6 [Morus notabilis] gjj587905947 gb EXB94058.1]                                       | Over Expressed | D48 |
| s07023g32286 | 1,529 | 0,007 | retrovirus-related Pol polyprotein                         | Retrovirus-related Pol polyprotein from transposon TNT 1-94 [Morus notabilis] gjj587900079 gb EXB88426.1] | Over Expressed | D48 |
| s12812g33704 | 1,524 | 0,001 | -                                                          | **** No hits found ****                                                                                   | Over Expressed | D48 |
| s00435g18390 | 1,511 | 0,039 | FAD-binding Berberine family protein                       | FAD-binding Berberine family protein [Theobroma cacao]                                                    | Over Expressed | D48 |
| s00065g06281 | 1,505 | 0,000 | uncharacterized protein LOC103449078                       | ### Not characterized<br>###:PREDICTED: uncharacterized protein LOC103449078 [Malus domestica]            | Over Expressed | D48 |
| s00397g17581 | 1,500 | 0,000 | -                                                          | ### Not characterized<br>###:hypothetical protein L484_013187 [Morus notabilis]                           | Over Expressed | D48 |
| s00269g14436 | 1,499 | 0,049 | cyclic nucleotide-gated ionchannel 2-like                  | PREDICTED: cyclic nucleotide-gated ionchannel 2-like [Citrus sinensis]                                    | Over Expressed | D48 |

|              |       |       |                                                                        |                                                                                                          |                   |     |
|--------------|-------|-------|------------------------------------------------------------------------|----------------------------------------------------------------------------------------------------------|-------------------|-----|
| s01649g29575 | 1,496 | 0,024 | similar to VITISV_002211                                               | ### Not characterized<br>###:hypothetical protein<br>VITISV_002211 [Vitis vinifera]                      | Over<br>Expressed | D48 |
| s00080g07234 | 1,496 | 0,001 | kinase superfamily protein                                             | Kinase superfamily protein<br>[Theobroma cacao]                                                          | Over<br>Expressed | D48 |
| s00114g08941 | 1,486 | 0,000 | DNA ligase                                                             | DNA ligase [Gossypium arboreum]                                                                          | Over<br>Expressed | D48 |
| s00017g02428 | 1,486 | 0,040 | -                                                                      | **** No hits found ****                                                                                  | Over<br>Expressed | D48 |
| s00026g03291 | 1,482 | 0,016 | NAC domain-containing protein 29                                       | NAC domain-containing protein 29<br>[Morus notabilis]                                                    | Over<br>Expressed | D48 |
| s10171g33112 | 1,482 | 0,044 | cellulose synthase-like protein G2                                     | Cellulose synthase-like protein G2<br>[Morus notabilis]                                                  | Over<br>Expressed | D48 |
| s00010g01565 | 1,482 | 0,045 | -                                                                      | **** No hits found ****                                                                                  | Over<br>Expressed | D48 |
| s01445g28803 | 1,468 | 0,000 | homeobox protein 31                                                    | Homeobox protein 31 [Theobroma cacao]<br>gi 508778518 gb EOY25774.1]                                     | Over<br>Expressed | D48 |
| s00358g16681 | 1,467 | 0,019 | -                                                                      | orf186 (mitochondrion) [Phoenix dactylifera]                                                             | Over<br>Expressed | D48 |
| s00172g11380 | 1,465 | 0,031 | NAC domain-containing protein 29                                       | NAC domain-containing protein 29<br>[Morus notabilis]                                                    | Over<br>Expressed | D48 |
| s00014g02018 | 1,461 | 0,011 | -                                                                      | PREDICTED: ABC transporter C family member 8-like [Prunus mume]                                          | Over<br>Expressed | D48 |
| s00004g00672 | 1,456 | 0,001 | auxin response factor 5                                                | Auxin response factor 5 [Morus notabilis]                                                                | Over<br>Expressed | D48 |
| s00077g07008 | 1,449 | 0,001 | transcription factor RF2b                                              | Transcription factor RF2b [Morus notabilis]                                                              | Over<br>Expressed | D48 |
| s01861g30132 | 1,441 | 0,004 | LRR receptor-like serine/threonine-protein kinase At1g07650 isoform X1 | PREDICTED: probable LRR receptor-like serine/threonine-protein kinase At1g07650 isoform X1 [Prunus mume] | Over<br>Expressed | D48 |
| s00526g20156 | 1,440 | 0,000 | common plant regulatory factor 1                                       | Common plant regulatory factor 1<br>[Morus notabilis]                                                    | Over<br>Expressed | D48 |
| s00099g08223 | 1,439 | 0,023 | similar to L484_015783                                                 | ### Not characterized<br>###:hypothetical protein<br>L484_015783 [Morus notabilis]                       | Over<br>Expressed | D48 |
| s13942g33922 | 1,430 | 0,045 | -                                                                      | **** No hits found ****                                                                                  | Over<br>Expressed | D48 |
| s00481g19303 | 1,412 | 0,019 | copperion binding protein                                              | Copper ion binding protein,<br>putative [Ricinus communis]                                               | Over<br>Expressed | D48 |
| s00780g23762 | 1,408 | 0,016 | heat stress transcription factor A-2                                   | Heat stress transcription factor A-2<br>[Morus notabilis]                                                | Over<br>Expressed | D48 |
| s00272g14499 | 1,401 | 0,036 | -                                                                      | PREDICTED: defensin Ec-AMP-D2-like [Nelumbo nucifera]                                                    | Over<br>Expressed | D48 |
| s00237g13551 | 1,401 | 0,001 | two-component response regulator-like protein                          | Two-component response regulator-like protein [Morus notabilis]                                          | Over<br>Expressed | D48 |
| s00581g21077 | 1,400 | 0,040 | -                                                                      | ### Not characterized<br>###:hypothetical protein<br>PRUPE_ppa015045mg [Prunus persica]                  | Over<br>Expressed | D48 |
| s00013g01956 | 1,399 | 0,000 | similar to L484_010133                                                 | ### Not characterized<br>###:hypothetical protein<br>L484_010133 [Morus notabilis]                       | Over<br>Expressed | D48 |
| s01210g27592 | 1,398 | 0,037 | C2 and GRAM domain-containing protein                                  | C2 and GRAM domain-containing protein [Morus notabilis]                                                  | Over<br>Expressed | D48 |

|              |       |       |                                                                                    |                                                                                                       |                |     |
|--------------|-------|-------|------------------------------------------------------------------------------------|-------------------------------------------------------------------------------------------------------|----------------|-----|
| s00054g05527 | 1,396 | 0,008 | alpha,alpha-trehalose-phosphate synthase [UDP-forming] 5                           | Alpha,alpha-trehalose-phosphate synthase [UDP-forming] 5 [Morus notabilis] gi 587877496 gb EXB66534.1 | Over Expressed | D48 |
| s00022g02901 | 1,395 | 0,000 | UDP-N-acetylglucosamine--peptide N-acetylglucosaminyltransferase SEC               | putative UDP-N-acetylglucosamine--peptide N-acetylglucosaminyltransferase SEC [Morus notabilis]       | Over Expressed | D48 |
| s00003g00522 | 1,393 | 0,043 | serine carboxypeptidase-like 48                                                    | Serine carboxypeptidase-like 48 [Morus notabilis]                                                     | Over Expressed | D48 |
| s00115g08974 | 1,388 | 0,003 | seed maturation protein LEA 4                                                      | seed maturation protein LEA 4 [Glycine tomentella]                                                    | Over Expressed | D48 |
| s00021g02805 | 1,385 | 0,000 | branched-chain-amino-acid aminotransferase 2                                       | Branched-chain-amino-acid aminotransferase 2 [Morus notabilis]                                        | Over Expressed | D48 |
| s00129g09594 | 1,382 | 0,005 | -                                                                                  | ***** No hits found *****                                                                             | Over Expressed | D48 |
| s01329g28248 | 1,380 | 0,001 | histidine decarboxylase                                                            | Histidine decarboxylase [Morus notabilis]                                                             | Over Expressed | D48 |
| s00180g11622 | 1,379 | 0,005 | similar to L484_024270                                                             | ### Not characterized ###:hypothetical protein L484_024270 [Morus notabilis]                          | Over Expressed | D48 |
| s00003g00546 | 1,375 | 0,004 | P-loop containing nucleoside triphosphate hydrolases superfamily protein isoform 1 | P-loop containing nucleoside triphosphate hydrolases superfamily protein isoform 1 [Theobroma cacao]  | Over Expressed | D48 |
| s00035g04065 | 1,373 | 0,026 | ATP binding protein                                                                | ATP binding protein, putative [Ricinus communis]                                                      | Over Expressed | D48 |
| s00057g05767 | 1,368 | 0,012 | proline-rich receptor-like protein kinase PERK8                                    | Proline-rich receptor-like protein kinase PERK8 [Morus notabilis]                                     | Over Expressed | D48 |
| s00147g10413 | 1,366 | 0,003 | granule-bound starch synthase 1                                                    | Granule-bound starch synthase 1 [Morus notabilis]                                                     | Over Expressed | D48 |
| s20056g35047 | 1,358 | 0,000 | receptor-like serine/threonine-protein kinase                                      | putative receptor-like serine/threonine-protein kinase [Morus notabilis] gi 587930118 gb EXC17247.1   | Over Expressed | D48 |
| s12175g33569 | 1,353 | 0,000 | magnesium transporter NIPA8                                                        | PREDICTED: probable magnesium transporter NIPA8 [Fragaria vesca subsp. vesca]                         | Over Expressed | D48 |
| s00044g04762 | 1,350 | 0,032 | xyloglucanase inhibitor 3                                                          | xyloglucanase inhibitor 3 [Humulus lupulus]                                                           | Over Expressed | D48 |
| s00007g01232 | 1,349 | 0,004 | O-fucosyltransferase family protein isoform 1                                      | O-fucosyltransferase family protein isoform 1 [Theobroma cacao]                                       | Over Expressed | D48 |
| s00120g09232 | 1,348 | 0,014 | membrane-associated kinase regulator 1                                             | PREDICTED: probable membrane-associated kinase regulator 1 [Populus euphratica]                       | Over Expressed | D48 |
| s00282g14764 | 1,346 | 0,041 | -                                                                                  | PREDICTED: dentin sialophosphoprotein [Malus domestica]                                               | Over Expressed | D48 |
| s00151g10558 | 1,341 | 0,000 | receptor-like protein 12                                                           | Receptor-like protein 12 [Morus notabilis]                                                            | Over Expressed | D48 |
| s00100g08254 | 1,340 | 0,000 | phosphoglucomutase / glucose phosphomutase                                         | Phosphoglucomutase / glucose phosphomutase, putative [Theobroma cacao] gi 508709124 gb EOY01021.1     | Over Expressed | D48 |
| s00022g02952 | 1,331 | 0,028 | phosphoenolpyruvate carboxylase kinase 1                                           | Phosphoenolpyruvate carboxylase kinase 1 [Morus notabilis]                                            | Over Expressed | D48 |
| s00913g25228 | 1,331 | 0,031 | 9-cis-epoxycarotenoid dioxygenase                                                  | 9-cis-epoxycarotenoid dioxygenase [Morus alba var. multicaulis]                                       | Over Expressed | D48 |
| s00622g21724 | 1,330 | 0,013 | F-box/FBD/LRR-repeat protein                                                       | F-box/FBD/LRR-repeat protein [Morus notabilis]                                                        | Over Expressed | D48 |

|              |       |       |                                                                                        |                                                                                                                 |                |     |
|--------------|-------|-------|----------------------------------------------------------------------------------------|-----------------------------------------------------------------------------------------------------------------|----------------|-----|
| s00038g04309 | 1,329 | 0,000 | enolase                                                                                | PREDICTED: enolase [Pyrus x bretschneideri]                                                                     | Over Expressed | D48 |
| s00089g07654 | 1,327 | 0,000 | heavy metal-associated isoprenylated plant protein 26-like                             | PREDICTED: heavy metal-associated isoprenylated plant protein 26-like [Populus euphratica]                      | Over Expressed | D48 |
| s16614g34429 | 1,325 | 0,000 | E3 ubiquitin-protein ligase RHA2B                                                      | putative E3 ubiquitin-protein ligase RHA2B [Morus notabilis]                                                    | Over Expressed | D48 |
| s00003g00517 | 1,324 | 0,049 | -                                                                                      | PREDICTED: protein NUCLEAR FUSION DEFECTIVE 4-like isoform X1 [Fragaria vesca subsp. vesca]                     | Over Expressed | D48 |
| s00140g10067 | 1,306 | 0,021 | lupeol synthase                                                                        | Lupeol synthase [Morus notabilis] gj 587869349 gb EXB58667.1                                                    | Over Expressed | D48 |
| s00176g11521 | 1,305 | 0,037 | -                                                                                      | ### Not characterized<br>###:PREDICTED: uncharacterized protein LOC104879574 [Vitis vinifera]                   | Over Expressed | D48 |
| s00244g13724 | 1,300 | 0,000 | uncharacterized protein L484_006539                                                    | ### Not characterized<br>###:Uncharacterized protein L484_006539 [Morus notabilis]                              | Over Expressed | D48 |
| s00863g24673 | 1,300 | 0,000 | -                                                                                      | UPF0481 protein [Morus notabilis] gj 587872854 gb EXB62071.1                                                    | Over Expressed | D48 |
| s00374g17086 | 1,296 | 0,033 | pentatricopeptide repeat-containing protein At1g43980, mitochondrial-like              | PREDICTED: pentatricopeptide repeat-containing protein At1g43980, mitochondrial-like [Pyrus x bretschneideri]   | Over Expressed | D48 |
| s00123g09350 | 1,293 | 0,000 | progesterone 5beta-reductase                                                           | putative progesterone 5beta-reductase [Ricinus communis]                                                        | Over Expressed | D48 |
| s01180g27397 | 1,292 | 0,005 | callose synthase 1                                                                     | Callose synthase 1 [Morus notabilis] gj 587888635 gb EXB77332.1                                                 | Over Expressed | D48 |
| s17273g34548 | 1,292 | 0,000 | UDP-glycosyltransferase 85A1                                                           | UDP-glycosyltransferase 85A1 [Morus notabilis]                                                                  | Over Expressed | D48 |
| s00201g12386 | 1,290 | 0,001 | -                                                                                      | **** No hits found ****                                                                                         | Over Expressed | D48 |
| s04321g31545 | 1,290 | 0,007 | -                                                                                      | **** No hits found ****                                                                                         | Over Expressed | D48 |
| s00280g14730 | 1,284 | 0,023 | similar to L484_024389                                                                 | ### Not characterized<br>###:hypothetical protein L484_024389 [Morus notabilis]                                 | Over Expressed | D48 |
| s00080g07240 | 1,284 | 0,003 | cytochrome P450 82A3                                                                   | Cytochrome P450 82A3 [Morus notabilis] gj 587919895 gb EXC07349.1                                               | Over Expressed | D48 |
| s01090g26759 | 1,277 | 0,000 | J domain-containing protein requiredfor chloroplast accumulation response 1 isoform X1 | PREDICTED: J domain-containing protein requiredfor chloroplast accumulation response 1 isoform X1 [Prunus mume] | Over Expressed | D48 |
| s00133g09788 | 1,274 | 0,025 | pheophytinase, chloroplastic                                                           | PREDICTED: pheophytinase, chloroplastic [Fragaria vesca subsp. vesca]                                           | Over Expressed | D48 |
| s00014g02014 | 1,260 | 0,039 | ABC transporter C family member 8                                                      | ABC transporter C family member 8 [Morus notabilis]                                                             | Over Expressed | D48 |
| s00350g16496 | 1,247 | 0,000 | scarecrow-like protein 3                                                               | PREDICTED: scarecrow-like protein 3 [Jatropha curcas]                                                           | Over Expressed | D48 |
| s00341g16287 | 1,246 | 0,020 | nucleoredoxin 2                                                                        | PREDICTED: probable nucleoredoxin 2 [Prunus mume]                                                               | Over Expressed | D48 |
| s00034g03979 | 1,243 | 0,024 | CBL-interacting serine/threonine-protein kinase 5                                      | CBL-interacting serine/threonine-protein kinase 5 [Morus notabilis]                                             | Over Expressed | D48 |
| s00507g19814 | 1,242 | 0,035 | sucrose synthase                                                                       | Sucrose synthase [Morus notabilis] gj 587926354 gb EXC13595.1                                                   | Over Expressed | D48 |



|              |       |       |                                                                      |                                                                                                     |                |     |
|--------------|-------|-------|----------------------------------------------------------------------|-----------------------------------------------------------------------------------------------------|----------------|-----|
| s00022g02900 | 1,242 | 0,000 | UDP-N-acetylglucosamine--peptide N-acetylglucosaminyltransferase SEC | putative UDP-N-acetylglucosamine--peptide N-acetylglucosaminyltransferase SEC [Morus notabilis]     | Over Expressed | D48 |
| s00001g00054 | 1,241 | 0,001 | uncharacterized protein LOC102627405                                 | ### Not characterized<br>###:PREDICTED: uncharacterized protein LOC102627405 [Citrus sinensis]      | Over Expressed | D48 |
| s00281g14755 | 1,235 | 0,001 | adagio protein 3                                                     | Adagio protein 3 [Morus notabilis] gj 587841729 gb EXB32326.1]                                      | Over Expressed | D48 |
| s00062g06071 | 1,233 | 0,016 | calcium-binding EF-hand family protein                               | Calcium-binding EF-hand family protein [Theobroma cacao]                                            | Over Expressed | D48 |
| s00128g09563 | 1,228 | 0,004 | ABC transporter I family member 17                                   | ABC transporter I family member 17 [Morus notabilis]                                                | Over Expressed | D48 |
| s00014g02078 | 1,225 | 0,013 | -                                                                    | PREDICTED: 60S ribosomal protein L18a-like protein [Pyrus x bretschneideri]                         | Over Expressed | D48 |
| s12592g33664 | 1,222 | 0,023 | -                                                                    | ***** No hits found *****                                                                           | Over Expressed | D48 |
| s00247g13789 | 1,216 | 0,010 | ABC transporter G family member 14                                   | ABC transporter G family member 14 [Morus notabilis]                                                | Over Expressed | D48 |
| s01169g27330 | 1,214 | 0,008 | serine/threonine-protein kinase samkC                                | PREDICTED: probable serine/threonine-protein kinase samkC [Pyrus x bretschneideri]                  | Over Expressed | D48 |
| s00653g22154 | 1,211 | 0,012 | -                                                                    | copa-like polyprotein [Arabidopsis thaliana]                                                        | Over Expressed | D48 |
| s00009g01544 | 1,210 | 0,049 | similar to L484_002709                                               | ### Not characterized<br>###:hypothetical protein L484_002709 [Morus notabilis]                     | Over Expressed | D48 |
| s00363g16834 | 1,209 | 0,000 | cysteine-rich receptor-like protein kinase 19 isoform X2             | PREDICTED: cysteine-rich receptor-like protein kinase 19 isoform X2 [Prunus mume]                   | Over Expressed | D48 |
| s00031g03740 | 1,204 | 0,043 | formin-like protein 20                                               | Formin-like protein 20 [Morus notabilis]                                                            | Over Expressed | D48 |
| s00014g02016 | 1,202 | 0,030 | ABC transporter C family member 8                                    | ABC transporter C family member 8 [Morus notabilis]                                                 | Over Expressed | D48 |
| s02148g30626 | 1,198 | 0,006 | pyrophosphate-energized vacuolar membrane proton pump                | Pyrophosphate-energized vacuolar membrane proton pump [Morus notabilis] gj 587877596 gb EXB66631.1] | Over Expressed | D48 |
| s00896g25044 | 1,194 | 0,000 | ribonuclease J                                                       | Ribonuclease J [Morus notabilis] gj 587916461 gb EXC04124.1]                                        | Over Expressed | D48 |
| s01268g27931 | 1,194 | 0,049 | auxin-induced protein 5NG4                                           | Auxin-induced protein 5NG4 [Morus notabilis]                                                        | Over Expressed | D48 |
| s00062g06053 | 1,190 | 0,033 | subtilisin-like protease                                             | Subtilisin-like protease [Morus notabilis]                                                          | Over Expressed | D48 |
| s00033g03917 | 1,186 | 0,002 | aspartate, glycine, lysineand serine-rich protein-like               | PREDICTED: aspartate, glycine, lysineand serine-rich protein-like [Prunus mume]                     | Over Expressed | D48 |
| s00051g05309 | 1,184 | 0,020 | -                                                                    | PREDICTED: protein DA1-related 2-like [Pyrus x bretschneideri]                                      | Over Expressed | D48 |
| s20785g35159 | 1,173 | 0,046 | -                                                                    | ***** No hits found *****                                                                           | Over Expressed | D48 |
| s00250g13895 | 1,167 | 0,044 | -                                                                    | PREDICTED: LOW QUALITY PROTEIN: protein TIME FOR COFFEE [Prunus mume]                               | Over Expressed | D48 |
| s21819g35310 | 1,166 | 0,025 | -                                                                    | PREDICTED: putative disease resistance RPP13-like protein 1 [Prunus mume]                           | Over Expressed | D48 |

|              |       |       |                                                                          |                                                                                                              |                |     |
|--------------|-------|-------|--------------------------------------------------------------------------|--------------------------------------------------------------------------------------------------------------|----------------|-----|
| s00055g05607 | 1,166 | 0,001 | 1-aminocyclopropane-1-carboxylate oxidase 3                              | PREDICTED: 1-aminocyclopropane-1-carboxylate oxidase 3 [Prunus mume]                                         | Over Expressed | D48 |
| s00122g09306 | 1,165 | 0,000 | -                                                                        | ***** No hits found *****                                                                                    | Over Expressed | D48 |
| s00257g14096 | 1,163 | 0,000 | niemann-Pick C1 protein                                                  | Niemann-Pick C1 protein [Morus notabilis] gi 587866873 gb EXB56311.1                                         | Over Expressed | D48 |
| s00042g04620 | 1,163 | 0,019 | lysine-specific demethylase 8                                            | Lysine-specific demethylase 8 [Morus notabilis]                                                              | Over Expressed | D48 |
| s00293g15070 | 1,163 | 0,000 | senescence-associated family protein                                     | senescence-associated family protein [Populus trichocarpa]                                                   | Over Expressed | D48 |
| s00011g01759 | 1,161 | 0,026 | similar to L484_022107                                                   | ### Not characterized<br>###:hypothetical protein L484_022107 [Morus notabilis]                              | Over Expressed | D48 |
| s00458g18878 | 1,161 | 0,011 | aquaporin TIP4-1                                                         | Aquaporin TIP4-1 [Morus notabilis] gi 587950043 gb EXC36042.1                                                | Over Expressed | D48 |
| s00004g00752 | 1,161 | 0,003 | omega-hydroxypalmitate O-feruloyl transferase                            | Omega-hydroxypalmitate O-feruloyl transferase [Morus notabilis]                                              | Over Expressed | D48 |
| s00713g22920 | 1,159 | 0,037 | pentatricopeptide repeat-containing protein At4g21065                    | PREDICTED: pentatricopeptide repeat-containing protein At4g21065 [Vitis vinifera]                            | Over Expressed | D48 |
| s00097g08127 | 1,157 | 0,005 | persulfide dioxygenase ETHE1 homolog, mitochondrial-like                 | PREDICTED: persulfide dioxygenase ETHE1 homolog, mitochondrial-like [Malus domestica]                        | Over Expressed | D48 |
| s00127g09536 | 1,153 | 0,014 | alpha-glucan water dikinase                                              | Alpha-glucan water dikinase [Morus notabilis]                                                                | Over Expressed | D48 |
| s00153g10646 | 1,151 | 0,030 | B3 domain-containing transcription factor VRN1                           | B3 domain-containing transcription factor VRN1 [Morus notabilis]                                             | Over Expressed | D48 |
| s00858g24618 | 1,149 | 0,026 | similar to VITISV_025708                                                 | ### Not characterized<br>###:hypothetical protein VITISV_025708 [Vitis vinifera]                             | Over Expressed | D48 |
| s00809g24104 | 1,149 | 0,032 | hippocampus abundant transcript-like protein 1                           | Hippocampus abundant transcript-like protein 1 [Morus notabilis]                                             | Over Expressed | D48 |
| s00704g22801 | 1,147 | 0,026 | gamma-irradiation and mitomycin c induced 1, putative isoform 1          | Gamma-irradiation and mitomycin c induced 1, putative isoform 1 [Theobroma cacao] gi 508776308 gb EOY23564.1 | Over Expressed | D48 |
| s01975g30351 | 1,146 | 0,039 | 1-phosphatidylinositol-3-phosphate 5-kinase                              | 1-phosphatidylinositol-3-phosphate 5-kinase [Morus notabilis]                                                | Over Expressed | D48 |
| s00433g18349 | 1,140 | 0,040 | filament-like plant protein 7                                            | PREDICTED: filament-like plant protein 7 [Prunus mume]                                                       | Over Expressed | D48 |
| s00051g05290 | 1,136 | 0,001 | sodium-dependent phosphate transport protein 1, chloroplastic isoform X1 | PREDICTED: sodium-dependent phosphate transport protein 1, chloroplastic isoform X1 [Jatropha curcas]        | Over Expressed | D48 |
| s08065g32585 | 1,131 | 0,001 | -                                                                        | Transcription factor RAX2 [Morus notabilis]                                                                  | Over Expressed | D48 |
| s00616g21633 | 1,121 | 0,025 | delta-1-pyrroline-5-carboxylate synthase                                 | Delta-1-pyrroline-5-carboxylate synthase [Morus notabilis]                                                   | Over Expressed | D48 |
| s00607g21475 | 1,117 | 0,027 | -                                                                        | Protein SENSITIVE TO PROTON RHIZOTOXICITY 1 [Morus notabilis]                                                | Over Expressed | D48 |

|              |       |       |                                                               |                                                                                                                 |                |     |
|--------------|-------|-------|---------------------------------------------------------------|-----------------------------------------------------------------------------------------------------------------|----------------|-----|
| s00223g13106 | 1,116 | 0,001 | receptor-like serine/threonine-protein kinase                 | putative receptor-like serine/threonine-protein kinase [Morus notabilis] gi 587930118 gb EXC17247.1             | Over Expressed | D48 |
| s00101g08269 | 1,116 | 0,015 | vesicle-associated protein 2-1                                | Vesicle-associated protein 2-1 [Morus notabilis]                                                                | Over Expressed | D48 |
| s00248g13812 | 1,116 | 0,021 | tubulin beta-1 chain                                          | Tubulin beta-1 chain [Morus notabilis] gi 587839844 gb EXB30492.1                                               | Over Expressed | D48 |
| s00003g00556 | 1,113 | 0,009 | arsenical pump-driving ATPase                                 | Putative arsenical pump-driving ATPase [Morus notabilis]                                                        | Over Expressed | D48 |
| s00067g06373 | 1,113 | 0,017 | inactive leucine-rich repeat receptor-like protein kinase     | putative inactive leucine-rich repeat receptor-like protein kinase [Morus notabilis] gi 587933566 gb EXC20529.1 | Over Expressed | D48 |
| s00016g02331 | 1,108 | 0,035 | ninja-family protein AFP2-like                                | PREDICTED: ninja-family protein AFP2-like [Populus euphratica]                                                  | Over Expressed | D48 |
| s01143g27133 | 1,108 | 0,000 | similar to L484_003205                                        | ### Not characterized<br>###:hypothetical protein L484_003205 [Morus notabilis]                                 | Over Expressed | D48 |
| s00142g10132 | 1,104 | 0,000 | U-box domain-containing protein 4                             | U-box domain-containing protein 4 [Morus notabilis]                                                             | Over Expressed | D48 |
| s00541g20418 | 1,103 | 0,017 | -                                                             | PREDICTED: protein CHUP1, chloroplastic [Prunus mume]                                                           | Over Expressed | D48 |
| s00089g07695 | 1,103 | 0,000 | hippocampus abundant transcript 1 protein                     | Hippocampus abundant transcript 1 protein [Morus notabilis]                                                     | Over Expressed | D48 |
| s00020g02774 | 1,102 | 0,002 | ABSCISIC ACID-INSENSITIVE 5-like protein 5                    | ABSCISIC ACID-INSENSITIVE 5-like protein 5 [Morus notabilis]                                                    | Over Expressed | D48 |
| s00068g06454 | 1,101 | 0,000 | GATA zinc finger domain-containing protein C1393.08 isoform 1 | GATA zinc finger domain-containing protein C1393.08 isoform 1 [Theobroma cacao] gi 508716396 gb EOY08293.1      | Over Expressed | D48 |
| s00005g00935 | 1,099 | 0,006 | similar to L484_008475                                        | ### Not characterized<br>###:hypothetical protein L484_008475 [Morus notabilis]                                 | Over Expressed | D48 |
| s00567g20831 | 1,097 | 0,006 | mitochondrial chaperone bcs1                                  | putative mitochondrial chaperone bcs1 [Morus notabilis]                                                         | Over Expressed | D48 |
| s00126g09485 | 1,089 | 0,017 | gibberellin receptor GID1B                                    | Gibberellin receptor GID1B [Morus notabilis]                                                                    | Over Expressed | D48 |
| s00882g24871 | 1,089 | 0,016 | UDP-glucose flavonoid 3-O-glucosyltransferase 6-like          | PREDICTED: UDP-glucose flavonoid 3-O-glucosyltransferase 6-like [Prunus mume]                                   | Over Expressed | D48 |
| s00142g10154 | 1,084 | 0,041 | transporter                                                   | putative transporter [Morus notabilis] gi 587907084 gb EXB95111.1                                               | Over Expressed | D48 |
| s00036g04142 | 1,084 | 0,041 | similar to L484_005803                                        | ### Not characterized<br>###:hypothetical protein L484_005803 [Morus notabilis]                                 | Over Expressed | D48 |

|              |       |       |                                                               |                                                                                                            |                |     |
|--------------|-------|-------|---------------------------------------------------------------|------------------------------------------------------------------------------------------------------------|----------------|-----|
| s00133g09761 | 1,083 | 0,049 | E3 ubiquitin-protein ligase UPL1                              | E3 ubiquitin-protein ligase UPL1 [Morus notabilis]                                                         | Over Expressed | D48 |
| s09585g32975 | 1,082 | 0,049 | -                                                             | ***** No hits found *****                                                                                  | Over Expressed | D48 |
| s00188g11951 | 1,079 | 0,021 | pleckstrin homology (PH) domain-containing protein            | pleckstrin homology (PH) domain-containing protein [Arabidopsis thaliana] gi 332658453 gb AEE83853.1       | Over Expressed | D48 |
| s00129g09593 | 1,078 | 0,000 | micronuclear linker histone polyprotein-like                  | PREDICTED: micronuclear linker histone polyprotein-like [Malus domestica]                                  | Over Expressed | D48 |
| s00062g06064 | 1,078 | 0,002 | thiol protease aleurain-like                                  | Thiol protease aleurain-like [Glycine soja]                                                                | Over Expressed | D48 |
| s00034g03980 | 1,075 | 0,013 | metal transporter Nramp6                                      | Metal transporter Nramp6 [Glycine soja]                                                                    | Over Expressed | D48 |
| s00698g22740 | 1,070 | 0,008 | zinc transporter 11                                           | Zinc transporter 11 [Morus notabilis] gi 587874120 gb EXB63273.1  Zinc transporter 11 [Morus notabilis]    | Over Expressed | D48 |
| s01189g27462 | 1,069 | 0,001 | catalytic                                                     | catalytic, putative [Ricinus communis] gi 223536879 gb EEF38517.1                                          | Over Expressed | D48 |
| s00519g20026 | 1,067 | 0,002 | multidrug resistance protein ABC transporter family           | Multidrug resistance protein ABC transporter family [Theobroma cacao]                                      | Over Expressed | D48 |
| s00567g20824 | 1,067 | 0,001 | TIM-barrel signal transduction protein isoform 2              | TIM-barrel signal transduction protein isoform 2 [Theobroma cacao]                                         | Over Expressed | D48 |
| s01497g29029 | 1,066 | 0,000 | transmembrane amino acid transporter family protein isoform 1 | Transmembrane amino acid transporter family protein isoform 1 [Theobroma cacao] gi 508786327 gb EOY33583.1 | Over Expressed | D48 |
| s10596g33210 | 1,065 | 0,016 | -                                                             | Transcription factor TGA7 [Morus notabilis]                                                                | Over Expressed | D48 |
| s00010g01566 | 1,064 | 0,005 | adiponectin receptor protein 2                                | Adiponectin receptor protein 2 [Morus notabilis]                                                           | Over Expressed | D48 |
| s00291g15011 | 1,063 | 0,008 | homeodomain-like transcriptional regulator isoform 1          | Homeodomain-like transcriptional regulator isoform 1 [Theobroma cacao] gi 508701748 gb EOX93644.1          | Over Expressed | D48 |
| s00926g25360 | 1,061 | 0,044 | homogentisate phytyltransferase 1                             | Homogentisate phytyltransferase 1 [Morus notabilis]                                                        | Over Expressed | D48 |
| s00104g08410 | 1,060 | 0,016 | pentatricopeptide repeat superfamily protein                  | Pentatricopeptide repeat superfamily protein, putative [Theobroma cacao] gi 508725197 gb EOY17094.1        | Over Expressed | D48 |
| s00103g08368 | 1,060 | 0,000 | isocitrate dehydrogenase [NADP]                               | Isocitrate dehydrogenase [NADP] [Morus notabilis]                                                          | Over Expressed | D48 |
| s00350g16501 | 1,058 | 0,000 | xanthoxin dehydrogenase                                       | Xanthoxin dehydrogenase [Morus notabilis]                                                                  | Over Expressed | D48 |
| s00868g24713 | 1,057 | 0,011 | methyltransferase                                             | Putative methyltransferase [Morus notabilis]                                                               | Over Expressed | D48 |
| s00113g08873 | 1,055 | 0,007 | -                                                             | gag-pol polyprotein [Populus deltoides]                                                                    | Over Expressed | D48 |

|              |       |       |                                                             |                                                                                                             |                |     |
|--------------|-------|-------|-------------------------------------------------------------|-------------------------------------------------------------------------------------------------------------|----------------|-----|
| s00779g23753 | 1,050 | 0,013 | cytochrome P450 98A2                                        | Cytochrome P450 98A2 [Morus notabilis]<br>gj 587944214 gb EXC30696.1                                        | Over Expressed | D48 |
| s00008g01357 | 1,049 | 0,013 | TSL-kinase interacting protein 1 isoform X2                 | PREDICTED: TSL-kinase interacting protein 1 isoform X2 [Vitis vinifera]                                     | Over Expressed | D48 |
| s00029g03549 | 1,049 | 0,015 | triacylglycerol lipase                                      | triacylglycerol lipase, putative [Ricinus communis]                                                         | Over Expressed | D48 |
| s00293g15063 | 1,046 | 0,001 | uncharacterized protein isoform 1                           | ### Not characterized<br>###:Uncharacterized protein isoform 1 [Theobroma cacao]                            | Over Expressed | D48 |
| s00028g03465 | 1,043 | 0,015 | -                                                           | PREDICTED: protein ENHANCED DISEASE RESISTANCE 2-like [Prunus mume]                                         | Over Expressed | D48 |
| s00208g12637 | 1,042 | 0,046 | -                                                           | ***** No hits found *****                                                                                   | Over Expressed | D48 |
| s00688g22598 | 1,035 | 0,009 | beige-related and WD-40 repeat-containing protein isoform 1 | Beige-related and WD-40 repeat-containing protein isoform 1 [Theobroma cacao]<br>gj 508704266 gb EOX96162.1 | Over Expressed | D48 |
| s00151g10584 | 1,035 | 0,001 | D-2-hydroxyglutarate dehydrogenase, mitochondrial           | PREDICTED: D-2-hydroxyglutarate dehydrogenase, mitochondrial [Fragaria vesca subsp. vesca]                  | Over Expressed | D48 |
| s00376g17137 | 1,034 | 0,002 | plastid-lipid-associated protein 14, chloroplastic          | PREDICTED: probable plastid-lipid-associated protein 14, chloroplastic [Jatropha curcas]                    | Over Expressed | D48 |
| s01143g27135 | 1,032 | 0,011 | CTL-like protein DDB_G0274487                               | PREDICTED: CTL-like protein DDB_G0274487 [Populus euphratica]                                               | Over Expressed | D48 |
| s00231g13352 | 1,031 | 0,002 | similar to L484_010894                                      | ### Not characterized<br>###:hypothetical protein L484_010894 [Morus notabilis]                             | Over Expressed | D48 |
| s00152g10627 | 1,031 | 0,031 | 1-acyl-sn-glycerol-3-phosphate acyltransferase 2            | 1-acyl-sn-glycerol-3-phosphate acyltransferase 2 [Morus notabilis]                                          | Over Expressed | D48 |
| s00080g07221 | 1,031 | 0,000 | E3 ubiquitin-protein ligase ARI4                            | Putative E3 ubiquitin-protein ligase ARI4 [Aegilops tauschii]                                               | Over Expressed | D48 |
| s00377g17171 | 1,031 | 0,043 | callose synthase 7                                          | PREDICTED: callose synthase 7 [Prunus mume]                                                                 | Over Expressed | D48 |
| s00003g00532 | 1,028 | 0,012 | ABC transporter F family member 1                           | ABC transporter F family member 1 [Morus notabilis]                                                         | Over Expressed | D48 |
| s00982g25866 | 1,025 | 0,000 | B3 domain-containing protein                                | B3 domain-containing protein [Morus notabilis]                                                              | Over Expressed | D48 |
| s01345g28331 | 1,019 | 0,013 | TMV resistance protein N                                    | TMV resistance protein N [Morus notabilis]                                                                  | Over Expressed | D48 |
| s00607g21473 | 1,018 | 0,035 | pheophorbide axygenase                                      | Pheophorbide axygenase [Morus notabilis]                                                                    | Over Expressed | D48 |
| s01357g28395 | 1,016 | 0,026 | TMV resistance protein N                                    | TMV resistance protein N [Morus notabilis]                                                                  | Over Expressed | D48 |
| s00030g03616 | 1,004 | 0,030 | similar to L484_019589                                      | ### Not characterized<br>###:hypothetical protein L484_019589 [Morus notabilis]                             | Over Expressed | D48 |

|              |        |       |                                                                   |                                                                                                                 |                 |     |
|--------------|--------|-------|-------------------------------------------------------------------|-----------------------------------------------------------------------------------------------------------------|-----------------|-----|
| s00512g19903 | 1,003  | 0,000 | endosomal targeting BRO1-like domain-containing protein isoform 2 | Endosomal targeting BRO1-like domain-containing protein isoform 2 [Theobroma cacao] gij508774320 gb EOY21576.1] | Over Expressed  | D48 |
| s00014g02021 | 1,003  | 0,045 | PRA1 family protein                                               | PRA1 family protein [Theobroma cacao] gij508779826 gb EOY27082.1]                                               | Over Expressed  | D48 |
| s00018g02498 | 1,002  | 0,006 | -                                                                 | PREDICTED: protein TRANSPARENT TESTA 12-like [Prunus mume]                                                      | Over Expressed  | D48 |
| s00254g14016 | -6,824 | 0,043 | F-box protein                                                     | F-box protein [Morus notabilis] gij587871717 gb EXB60973.1]                                                     | Under Expressed | D48 |
| s00246g13769 | -6,585 | 0,017 | dCTP pyrophosphatase 1-like                                       | PREDICTED: dCTP pyrophosphatase 1-like [Prunus mume]                                                            | Under Expressed | D48 |
| s00470g19106 | -6,342 | 0,003 | -                                                                 | PREDICTED: probable calcium-binding protein CML10 [Malus domestica]                                             | Under Expressed | D48 |
| s07340g32375 | -6,158 | 0,022 | -                                                                 | **** No hits found ****                                                                                         | Under Expressed | D48 |
| s00138g09991 | -6,030 | 0,000 | -                                                                 | CDP-diacylglycerol--glycerol-3-phosphate 3-phosphatidyltransferase, putative, partial [Theobroma cacao]         | Under Expressed | D48 |
| s00004g00683 | -6,019 | 0,009 | galactose oxidase                                                 | galactose oxidase [Ziziphus jujuba]                                                                             | Under Expressed | D48 |
| s00469g19088 | -5,169 | 0,001 | -                                                                 | **** No hits found ****                                                                                         | Under Expressed | D48 |
| s00470g19104 | -4,992 | 0,000 | -                                                                 | Calcium-binding EF-hand family protein, putative [Theobroma cacao]                                              | Under Expressed | D48 |
| s00004g00795 | -4,986 | 0,025 | dnaJ homolog subfamily C member 2                                 | DnaJ homolog subfamily C member 2 [Morus notabilis]                                                             | Under Expressed | D48 |
| s01043g26402 | -4,583 | 0,000 | -                                                                 | ### Not characterized<br>###:hypothetical protein L484_018186 [Morus notabilis]                                 | Under Expressed | D48 |
| s00075g06872 | -4,569 | 0,021 | -                                                                 | **** No hits found ****                                                                                         | Under Expressed | D48 |
| s00356g16647 | -4,428 | 0,048 | -                                                                 | PREDICTED: G-type lectin S-receptor-like serine/threonine-protein kinase At1g34300 [Jatropha curcas]            | Under Expressed | D48 |
| s00470g19108 | -4,368 | 0,000 | -                                                                 | Polcalcin Jun o 2 [Morus notabilis] gij587932722 gb EXC19749.1]                                                 | Under Expressed | D48 |
| s00143g10196 | -4,080 | 0,001 | similar to L484_010790                                            | ### Not characterized<br>###:hypothetical protein L484_010790 [Morus notabilis]                                 | Under Expressed | D48 |
| s00375g17122 | -3,912 | 0,000 | similar to L484_010721                                            | ### Not characterized<br>###:hypothetical protein L484_010721 [Morus notabilis]                                 | Under Expressed | D48 |
| s00192g12067 | -3,849 | 0,000 | aspartic proteinase nepenthesin-1                                 | Aspartic proteinase nepenthesin-1 [Morus notabilis]                                                             | Under Expressed | D48 |
| s00300g15254 | -3,725 | 0,016 | xyloglucan endotransglucosylase/hydrolase protein 33              | putative xyloglucan endotransglucosylase/hydrolase protein 33 [Morus notabilis] gij587894084 gb EXB82616.1]     | Under Expressed | D48 |
| s00470g19105 | -3,551 | 0,000 | -                                                                 | PREDICTED: probable calcium-binding protein CML10 [Malus domestica]                                             | Under Expressed | D48 |
| s00723g23061 | -3,506 | 0,002 | -                                                                 | Transcription factor WER [Morus notabilis]                                                                      | Under Expressed | D48 |

|              |        |       |                                           |                                                                                                    |                 |     |
|--------------|--------|-------|-------------------------------------------|----------------------------------------------------------------------------------------------------|-----------------|-----|
| s01278g27975 | -3,428 | 0,000 | two-component response regulator          | Two-component response regulator [Morus notabilis]                                                 | Under Expressed | D48 |
| s00469g19086 | -3,341 | 0,007 | -                                         | ***** No hits found *****                                                                          | Under Expressed | D48 |
| s00020g02730 | -3,280 | 0,000 | isoaspartyl peptidase/L-asparaginase 2    | putative isoaspartyl peptidase/L-asparaginase 2 [Morus notabilis]                                  | Under Expressed | D48 |
| s00063g06158 | -3,235 | 0,025 | momilactone A synthase                    | Momilactone A synthase [Morus notabilis]                                                           | Under Expressed | D48 |
| s00266g14365 | -3,221 | 0,003 | pectinesterase/pectinesterase inhibitor 6 | putative pectinesterase/pectinesterase inhibitor 6 [Morus notabilis]<br>gi 587902662 gb EXB90901.1 | Under Expressed | D48 |
| s00234g13451 | -3,212 | 0,024 | -                                         | PREDICTED: transcription factor bHLH137-like [Prunus mume]                                         | Under Expressed | D48 |
| s06315g32096 | -3,190 | 0,004 | (RS)-norcoclaurine 6-O-methyltransferase  | (RS)-norcoclaurine 6-O-methyltransferase [Morus notabilis]                                         | Under Expressed | D48 |
| s03907g31418 | -3,121 | 0,014 | -                                         | ***** No hits found *****                                                                          | Under Expressed | D48 |
| s00105g08469 | -3,106 | 0,008 | homogentisate phytyltransferase 2         | Homogentisate phytyltransferase 2 [Morus notabilis]                                                | Under Expressed | D48 |
| s00055g05591 | -3,103 | 0,001 | ankyrin repeat-containing protein         | Ankyrin repeat-containing protein [Morus notabilis]                                                | Under Expressed | D48 |
| s00458g18864 | -2,994 | 0,007 | -                                         | (RS)-norcoclaurine 6-O-methyltransferase [Morus notabilis]                                         | Under Expressed | D48 |
| s00414g17945 | -2,985 | 0,018 | similar to L484_008667                    | ### Not characterized<br>###:hypothetical protein L484_008667 [Morus notabilis]                    | Under Expressed | D48 |
| s00289g14969 | -2,972 | 0,010 | feruloyl CoA ortho-hydroxylase 1-like     | PREDICTED: feruloyl CoA ortho-hydroxylase 1-like [Prunus mume]                                     | Under Expressed | D48 |
| s00034g03992 | -2,952 | 0,001 | zinc finger protein 3                     | Zinc finger protein 3 [Morus notabilis]<br>gi 587860504 gb EXB50403.1                              | Under Expressed | D48 |
| s00232g13386 | -2,942 | 0,042 | -                                         | ### Not characterized<br>###:hypothetical protein L484_005247 [Morus notabilis]                    | Under Expressed | D48 |
| s00263g14271 | -2,936 | 0,034 | -                                         | ***** No hits found *****                                                                          | Under Expressed | D48 |
| s00004g00779 | -2,926 | 0,006 | dnaJ homolog subfamily C member 1         | DnaJ homolog subfamily C member 1 [Morus notabilis]                                                | Under Expressed | D48 |
| s00088g07626 | -2,918 | 0,005 | nitrate excretion transporter 6           | putative nitrate excretion transporter 6 [Morus notabilis]                                         | Under Expressed | D48 |
| s04538g31615 | -2,816 | 0,049 | -                                         | polygalacturonase inhibiting protein [Ulmus pumila]                                                | Under Expressed | D48 |
| s00009g01520 | -2,638 | 0,002 | subtilisin-like protease                  | Subtilisin-like protease [Morus notabilis]                                                         | Under Expressed | D48 |
| s01007g26080 | -2,591 | 0,036 | -                                         | PREDICTED: auxin-induced protein 15A-like [Malus domestica]                                        | Under Expressed | D48 |
| s00085g07457 | -2,586 | 0,013 | -                                         | PREDICTED: CASP-like protein 4D1 [Fragaria vesca subsp. vesca]                                     | Under Expressed | D48 |

|              |        |       |                                                             |                                                                                                            |                 |     |
|--------------|--------|-------|-------------------------------------------------------------|------------------------------------------------------------------------------------------------------------|-----------------|-----|
| s00111g08757 | -2,581 | 0,000 | aspartic proteinase nepenthesin-2                           | Aspartic proteinase nepenthesin-2 [Morus notabilis]                                                        | Under Expressed | D48 |
| s00941g25505 | -2,430 | 0,032 | -                                                           | ### Not characterized<br>###:hypothetical protein<br>L484_020796 [Morus notabilis]                         | Under Expressed | D48 |
| s00082g07325 | -2,421 | 0,002 | RING finger and CHY zinc finger domain-containing protein 1 | RING fingerand CHY zinc finger domain-containing protein 1 [Morus notabilis]<br>gij587887097 gb EXB75898.1 | Under Expressed | D48 |
| s00040g04463 | -2,409 | 0,002 | -                                                           | GAST-like gene product family protein [Populus trichocarpa]                                                | Under Expressed | D48 |
| s00007g01254 | -2,394 | 0,031 | UDP-glycosyltransferase 91A1-like                           | PREDICTED: UDP-glycosyltransferase 91A1-like [Prunus mume]                                                 | Under Expressed | D48 |
| s00122g09301 | -2,334 | 0,004 | -                                                           | **** No hits found ****                                                                                    | Under Expressed | D48 |
| s00304g15359 | -2,329 | 0,011 | zinc transporter 1                                          | Zinc transporter 1 [Morus notabilis]<br>gij587938034 gb EXC24818.1                                         | Under Expressed | D48 |
| s01452g28826 | -2,322 | 0,032 | -                                                           | PREDICTED: U-box domain-containing protein 35 [Jatropha curcas]                                            | Under Expressed | D48 |
| s00800g23992 | -2,310 | 0,014 | glutamine amidotransferase                                  | Putative Glutamine amidotransferase [Morus notabilis]                                                      | Under Expressed | D48 |
| s00003g00585 | -2,224 | 0,000 | lysine decarboxylase family protein, putative isoform 2     | Lysine decarboxylase family protein, putative isoform 2 [Theobroma cacao]<br>gij508787142 gb EOY34398.1    | Under Expressed | D48 |
| s00066g06358 | -2,194 | 0,001 | glycine-rich protein 2b                                     | Glycine-rich protein 2b [Morus notabilis]                                                                  | Under Expressed | D48 |
| s00235g13483 | -2,152 | 0,041 | centromere-associated protein E                             | Centromere-associated protein E [Morus notabilis]                                                          | Under Expressed | D48 |
| s09224g32879 | -2,139 | 0,012 | lupeol synthase                                             | Lupeol synthase [Morus notabilis]<br>gij587916353 gb EXC04031.1                                            | Under Expressed | D48 |
| s00047g05008 | -2,135 | 0,005 | glutaredoxin-C13                                            | PREDICTED: glutaredoxin-C13 [Vitis vinifera]                                                               | Under Expressed | D48 |
| s00312g15576 | -2,129 | 0,046 | WAT1-related protein At4g08300-like                         | PREDICTED: WAT1-related protein At4g08300-like [Prunus mume]                                               | Under Expressed | D48 |
| s00116g09014 | -2,107 | 0,037 | AP2/ERF and B3 domain-containing transcription factor RAV1  | AP2/ERF and B3 domain-containing transcription factor RAV1 [Morus notabilis]<br>gij587864332 gb EXB53997.1 | Under Expressed | D48 |
| s25673g35834 | -2,103 | 0,011 | -                                                           | **** No hits found ****                                                                                    | Under Expressed | D48 |
| s00006g01047 | -2,100 | 0,000 | phosphoenolpyruvate/phosphate translocator 2                | Phosphoenolpyruvate/phosphate translocator 2 [Morus notabilis]                                             | Under Expressed | D48 |
| s00163g11038 | -2,082 | 0,023 | invertase inhibitor                                         | Putative invertase inhibitor [Morus notabilis]                                                             | Under Expressed | D48 |
| s00428g18250 | -2,070 | 0,001 | PAN domain-containing protein                               | PAN domain-containing protein [Morus notabilis]                                                            | Under Expressed | D48 |
| s00172g11374 | -2,028 | 0,013 | 40S ribosomal protein S17-4                                 | 40S ribosomal protein S17-4 [Morus notabilis]                                                              | Under Expressed | D48 |
| s00625g21758 | -2,017 | 0,044 | myosin heavy chain, striated muscle                         | PREDICTED: myosin heavy chain, striated muscle [Prunus mume]                                               | Under Expressed | D48 |



|              |        |       |                                                            |                                                                                                              |                 |     |
|--------------|--------|-------|------------------------------------------------------------|--------------------------------------------------------------------------------------------------------------|-----------------|-----|
| s00117g09060 | -2,008 | 0,003 | tryptophan aminotransferase-related protein 2              | Tryptophan aminotransferase-related protein 2 [Morus notabilis]                                              | Under Expressed | D48 |
| s00309g15490 | -1,992 | 0,023 | -                                                          | CAMP-regulated phosphoprotein 19-related protein isoform 1 [Theobroma cacao] gij590661689 ref XP_007035743.1 | Under Expressed | D48 |
| s00125g09454 | -1,990 | 0,000 | -                                                          | PREDICTED: protein ZINC INDUCED FACILITATOR 1-like isoform X2 [Populus euphratica]                           | Under Expressed | D48 |
| s00048g05047 | -1,981 | 0,008 | CHASE domain containing histidine kinase protein isoform 1 | CHASE domain containing histidine kinase protein isoform 1 [Theobroma cacao] gij508709416 gb EOY01313.1      | Under Expressed | D48 |
| s25137g35769 | -1,980 | 0,017 | zinc finger protein 7                                      | Zinc finger protein 7 [Morus notabilis] gi 587978388 gb EXC63022.1                                           | Under Expressed | D48 |
| s00024g03101 | -1,973 | 0,021 | homeobox-leucine zipper protein HAT3                       | Homeobox-leucine zipper protein HAT3 [Morus notabilis]                                                       | Under Expressed | D48 |
| s00184g11780 | -1,967 | 0,021 | suppressorof disruption of TFIS                            | PREDICTED: suppressorof disruption of TFIS [Eucalyptus grandis]                                              | Under Expressed | D48 |
| s10083g33087 | -1,899 | 0,019 | -                                                          | Oxidative stress 3 [Theobroma cacao] gij508783361 gb EOY30617.1                                              | Under Expressed | D48 |
| s00028g03486 | -1,891 | 0,018 | F-box only protein 13                                      | F-box only protein 13 [Morus notabilis] gij587886094 gb EXB74928.1                                           | Under Expressed | D48 |
| s00173g11386 | -1,890 | 0,028 | serine carboxypeptidase-like 35                            | Serine carboxypeptidase-like 35 [Theobroma cacao]                                                            | Under Expressed | D48 |
| s00529g20205 | -1,879 | 0,011 | LRR receptor-like serine/threonine-protein kinase          | putative LRR receptor-like serine/threonine-protein kinase [Morus notabilis] gij587870238 gb EXB59528.1      | Under Expressed | D48 |
| s16786g34460 | -1,876 | 0,006 | isoprene synthase                                          | isoprene synthase [Ficus septica]                                                                            | Under Expressed | D48 |
| s00621g21706 | -1,875 | 0,035 | thymidine kinase                                           | Thymidine kinase [Morus notabilis] gij587948661 gb EXC34914.1                                                | Under Expressed | D48 |
| s05800g31963 | -1,875 | 0,000 | subtilisin-like protease                                   | Subtilisin-like protease [Morus notabilis]                                                                   | Under Expressed | D48 |
| s01621g29487 | -1,867 | 0,015 | -                                                          | PREDICTED: reticuline oxidase-like protein [Vigna radiata var. radiata]                                      | Under Expressed | D48 |
| s00107g08590 | -1,862 | 0,033 | -                                                          | **** No hits found ****                                                                                      | Under Expressed | D48 |
| s00183g11778 | -1,858 | 0,001 | peptide/nitrate transporter                                | putative peptide/nitrate transporter [Morus notabilis]                                                       | Under Expressed | D48 |
| s00072g06717 | -1,847 | 0,039 | two-component response regulator                           | Two-component response regulator [Morus notabilis]                                                           | Under Expressed | D48 |
| s00279g14685 | -1,836 | 0,013 | similar to L484_010449                                     | ### Not characterized ###:hypothetical protein L484_010449 [Morus notabilis]                                 | Under Expressed | D48 |
| s00421g18096 | -1,826 | 0,013 | isoprene synthase                                          | isoprene synthase [Ficus virgata]                                                                            | Under Expressed | D48 |
| s00246g13770 | -1,815 | 0,041 | polyubiquitin-like                                         | PREDICTED: polyubiquitin-like [Prunus mume]                                                                  | Under Expressed | D48 |
| s00456g18833 | -1,812 | 0,009 | -                                                          | **** No hits found ****                                                                                      | Under Expressed | D48 |

|              |        |       |                                                           |                                                                                                           |                 |     |
|--------------|--------|-------|-----------------------------------------------------------|-----------------------------------------------------------------------------------------------------------|-----------------|-----|
| s00910g25196 | -1,810 | 0,018 | transcription factor CPC                                  | Transcription factor CPC [Morus notabilis]                                                                | Under Expressed | D48 |
| s00045g04865 | -1,805 | 0,013 | cysteine/Histidine-rich C1 domain family protein          | Cysteine/Histidine-rich C1 domain family protein [Theobroma cacao]                                        | Under Expressed | D48 |
| s01777g29948 | -1,801 | 0,045 | cytochrome P450 76C1                                      | Cytochrome P450 76C1 [Morus notabilis]<br>gij587906958 gb EXB94994.1                                      | Under Expressed | D48 |
| s00109g08687 | -1,794 | 0,000 | F-box/kelch-repeat protein                                | F-box/kelch-repeat protein [Morus notabilis]                                                              | Under Expressed | D48 |
| s02508g30923 | -1,789 | 0,047 | -                                                         | **** No hits found ****                                                                                   | Under Expressed | D48 |
| s00212g12766 | -1,788 | 0,000 | transcription factor bHLH93-like                          | PREDICTED: transcription factor bHLH93-like [Malus domestica]                                             | Under Expressed | D48 |
| s00232g13384 | -1,769 | 0,013 | -                                                         | ### Not characterized<br>###:hypothetical protein<br>L484_005250 [Morus notabilis]                        | Under Expressed | D48 |
| s00279g14695 | -1,750 | 0,000 | -                                                         | ### Not characterized<br>###:hypothetical protein<br>L484_015346 [Morus notabilis]                        | Under Expressed | D48 |
| s00983g25877 | -1,731 | 0,046 | calcium-binding protein CML25                             | putative calcium-binding protein CML25 [Morus notabilis]                                                  | Under Expressed | D48 |
| s00220g13014 | -1,715 | 0,037 | pectinesterase/pectinesterase inhibitor 35                | putative pectinesterase/pectinesterase inhibitor 35 [Morus notabilis]<br>gij587909537 gb EXB97446.1       | Under Expressed | D48 |
| s00012g01860 | -1,711 | 0,031 | -                                                         | transmembrane protein, putative [Medicago truncatula]                                                     | Under Expressed | D48 |
| s00390g17446 | -1,701 | 0,000 | similar to L484_021072                                    | ### Not characterized<br>###:hypothetical protein<br>L484_021072 [Morus notabilis]                        | Under Expressed | D48 |
| s00150g10530 | -1,696 | 0,021 | similar to L484_013410                                    | ### Not characterized<br>###:hypothetical protein<br>L484_013410 [Morus notabilis]                        | Under Expressed | D48 |
| s01389g28557 | -1,696 | 0,007 | flowering locus T-like protein                            | flowering locus T-like protein [Ficus carica]                                                             | Under Expressed | D48 |
| s00080g07187 | -1,694 | 0,000 | anthocyanidin 3-O-glucosyltransferase 5-like              | PREDICTED: anthocyanidin 3-O-glucosyltransferase 5-like [Fragaria vesca subsp. vesca]                     | Under Expressed | D48 |
| s00033g03925 | -1,693 | 0,005 | palmitoyl-monogalactosyldiacylglycerol delta-7 desaturase | Palmitoyl-monogalactosyldiacylglycerol delta-7 desaturase [Morus notabilis]<br>gij587878284 gb EXB67291.1 | Under Expressed | D48 |
| s00270g14464 | -1,687 | 0,004 | F-box/kelch-repeat protein                                | F-box/kelch-repeat protein [Morus notabilis]                                                              | Under Expressed | D48 |
| s00147g10400 | -1,670 | 0,046 | -                                                         | PREDICTED: protein<br>BRANCHLESS TRICHOME [Jatropha curcas]                                               | Under Expressed | D48 |
| s00038g04336 | -1,665 | 0,004 | alpha-L-fucosidase 1                                      | Alpha-L-fucosidase 1 [Morus notabilis]<br>gij587933925 gb EXC20875.1                                      | Under Expressed | D48 |
| s00056g05649 | -1,661 | 0,000 | T-complex protein 1 subunit beta                          | T-complex protein 1 subunit beta [Morus notabilis]                                                        | Under Expressed | D48 |
| s00087g07597 | -1,657 | 0,004 | -                                                         | **** No hits found ****                                                                                   | Under Expressed | D48 |
| s01144g27147 | -1,648 | 0,044 | -                                                         | **** No hits found ****                                                                                   | Under Expressed | D48 |
| s00014g02106 | -1,627 | 0,029 | auxin-binding protein ABP19a                              | Auxin-binding protein ABP19a [Morus notabilis]                                                            | Under Expressed | D48 |

|              |        |       |                                               |                                                                                                            |                 |     |
|--------------|--------|-------|-----------------------------------------------|------------------------------------------------------------------------------------------------------------|-----------------|-----|
| s00537g20336 | -1,623 | 0,000 | cyclic nucleotide-gated ionchannel 14         | putative cyclic nucleotide-gated ionchannel 14 [Morus notabilis]                                           | Under Expressed | D48 |
| s00113g08855 | -1,623 | 0,020 | high mobility group B protein 9               | High mobility group B protein 9 [Morus notabilis]                                                          | Under Expressed | D48 |
| s00186g11907 | -1,613 | 0,004 | mitochondrial chaperone bcs1                  | putative mitochondrial chaperone bcs1 [Morus notabilis]                                                    | Under Expressed | D48 |
| s00137g09958 | -1,608 | 0,000 | cytochrome P450 90A1                          | PREDICTED: cytochrome P450 90A1 [Prunus mume]                                                              | Under Expressed | D48 |
| s02447g30886 | -1,604 | 0,001 | lupeol synthase                               | Lupeol synthase [Morus notabilis] gjj587852429 gb EXB42556.1                                               | Under Expressed | D48 |
| s00070g06634 | -1,604 | 0,015 | fatty acid desaturase 4, chloroplastic        | PREDICTED: fatty acid desaturase 4, chloroplastic [Fragaria vesca subsp. vesca]                            | Under Expressed | D48 |
| s00093g07928 | -1,597 | 0,004 | -                                             | **** No hits found ****                                                                                    | Under Expressed | D48 |
| s00833g24350 | -1,595 | 0,016 | nuc-1 negative regulatory protein preg        | Nuc-1 negative regulatory protein preg, putative [Ricinus communis]                                        | Under Expressed | D48 |
| s00313g15588 | -1,588 | 0,000 | peptide transporter PTR3-A-like               | PREDICTED: peptide transporter PTR3-A-like [Citrus sinensis]                                               | Under Expressed | D48 |
| s02038g30445 | -1,587 | 0,013 | -                                             | isoprene synthase [Ficus septica]                                                                          | Under Expressed | D48 |
| s00603g21413 | -1,585 | 0,000 | -                                             | PREDICTED: protein trichome birefringence-like 19 [Pyrus x bretschneideri] gjl694332764 ref XP_009357004.1 | Under Expressed | D48 |
| s00001g00130 | -1,575 | 0,004 | 12-oxophytodienoate reductase 11              | Putative 12-oxophytodienoate reductase 11 [Morus notabilis]                                                | Under Expressed | D48 |
| s00536g20333 | -1,566 | 0,006 | tRNA(adenine(34)) deaminase, chloroplastic    | PREDICTED: tRNA(adenine(34)) deaminase, chloroplastic [Fragaria vesca subsp. vesca]                        | Under Expressed | D48 |
| s00378g17180 | -1,565 | 0,024 | LIM and calponin domains-containing protein 1 | LIM andcalponin domains-containing protein 1, putative [Theobroma cacao] gjl508720366 gb EOY12263.1        | Under Expressed | D48 |
| s00098g08156 | -1,560 | 0,000 | RING-H2 finger protein ATL1                   | RING-H2 finger protein ATL1 [Morus notabilis]                                                              | Under Expressed | D48 |
| s01056g26517 | -1,550 | 0,036 | transcription factor bHLH63                   | PREDICTED: transcription factor bHLH63 [Prunus mume]                                                       | Under Expressed | D48 |
| s26784g35980 | -1,549 | 0,012 | -                                             | **** No hits found ****                                                                                    | Under Expressed | D48 |
| s00183g11777 | -1,533 | 0,009 | peptide/nitrate transporter                   | putative peptide/nitrate transporter [Morus notabilis]                                                     | Under Expressed | D48 |
| s00020g02719 | -1,526 | 0,028 | receptor protein kinase ZmPK1                 | Putative receptor protein kinase ZmPK1 [Morus notabilis]                                                   | Under Expressed | D48 |
| s00079g07172 | -1,524 | 0,007 | -                                             | PREDICTED: transcription factor IBH1-like [Prunus mume]                                                    | Under Expressed | D48 |
| s00483g19354 | -1,521 | 0,049 | -                                             | **** No hits found ****                                                                                    | Under Expressed | D48 |
| s00002g00439 | -1,504 | 0,000 | sulfate transporter 3.1                       | Sulfate transporter 3.1 [Morus notabilis]                                                                  | Under Expressed | D48 |
| s00102g08339 | -1,503 | 0,007 | GDSL esterase/lipase 1                        | GDSL esterase/lipase 1 [Morus notabilis]                                                                   | Under Expressed | D48 |
| s00084g07446 | -1,491 | 0,031 | cysteine-rich repeat secretory protein 60     | PREDICTED: cysteine-rich repeat secretory protein 60 [Populus euphratica]                                  | Under Expressed | D48 |

|              |        |       |                                                                  |                                                                                                                                                                                 |                 |     |
|--------------|--------|-------|------------------------------------------------------------------|---------------------------------------------------------------------------------------------------------------------------------------------------------------------------------|-----------------|-----|
| s05042g31759 | -1,491 | 0,000 | dehydration-responsive element-binding protein 2A                | Dehydration-responsive element-binding protein 2A [Morus notabilis]                                                                                                             | Under Expressed | D48 |
| s00471g19131 | -1,477 | 0,007 | -                                                                | heat shock 22 kDa protein, mitochondrial [Glycine max]                                                                                                                          | Under Expressed | D48 |
| s00053g05460 | -1,476 | 0,004 | -                                                                | ### Not characterized<br>###:hypothetical protein<br>CICLE_v10012886mg [Citrus clementina]                                                                                      | Under Expressed | D48 |
| s01396g28586 | -1,476 | 0,002 | -                                                                | ### Not characterized<br>###:hypothetical protein<br>L484_014646 [Morus notabilis]                                                                                              | Under Expressed | D48 |
| s00610g21549 | -1,473 | 0,013 | -                                                                | Ubiquitin carboxyl-terminal hydrolase 8 [Morus notabilis]                                                                                                                       | Under Expressed | D48 |
| s00088g07643 | -1,472 | 0,027 | pseudo response regulator, putative isoform 4                    | Pseudo response regulator, putative isoform 4 [Theobroma cacao]                                                                                                                 | Under Expressed | D48 |
| s00237g13541 | -1,456 | 0,000 | granule-bound starch synthase 1, chloroplastic/amyloplastic-like | PREDICTED: granule-bound starch synthase 1, chloroplastic/amyloplastic-like [Pyrus x bretschneideri]                                                                            | Under Expressed | D48 |
| s00539g20370 | -1,438 | 0,043 | octicosapeptide/Phox/Bem1p family protein                        | Octicosapeptide/Phox/Bem1p family protein [Theobroma cacao]                                                                                                                     | Under Expressed | D48 |
| s14207g33986 | -1,430 | 0,015 | transcription factor UNE10                                       | Transcription factor UNE10 [Morus notabilis]                                                                                                                                    | Under Expressed | D48 |
| s00760g23512 | -1,426 | 0,026 | -                                                                | PREDICTED: protein LURP-one-related 5-like [Gossypium raimondii]                                                                                                                | Under Expressed | D48 |
| s01981g30359 | -1,423 | 0,030 | isoprene synthase                                                | isoprene synthase [Ficus septica]                                                                                                                                               | Under Expressed | D48 |
| s00522g20093 | -1,420 | 0,006 | U-box domain-containing protein 28                               | U-box domain-containing protein 28 [Morus notabilis]                                                                                                                            | Under Expressed | D48 |
| s00332g16075 | -1,417 | 0,000 | centrosomal protein of 135 kDa                                   | PREDICTED: centrosomal protein of 135 kDa [Malus domestica]                                                                                                                     | Under Expressed | D48 |
| s00082g07313 | -1,412 | 0,030 | ACT domain-containing protein ACR10-like                         | PREDICTED: ACT domain-containing protein ACR10-like [Glycine max]                                                                                                               | Under Expressed | D48 |
| s00361g16776 | -1,405 | 0,004 | zinc finger protein CONSTANS-LIKE 11                             | Putative zinc finger protein CONSTANS-LIKE 11 [Morus notabilis]                                                                                                                 | Under Expressed | D48 |
| s00109g08670 | -1,397 | 0,005 | F-box protein                                                    | F-box protein [Morus notabilis] gj 587949568 gb EXC35687.1  F-box protein [Morus notabilis]                                                                                     | Under Expressed | D48 |
| s00052g05359 | -1,397 | 0,020 | phytochrome kinase substrate-related family protein              | phytochrome kinase substrate-related family protein [Populus trichocarpa] gj 550322233 gb ERP52266.1  phytochrome kinase substrate-related family protein [Populus trichocarpa] | Under Expressed | D48 |
| s03945g31435 | -1,396 | 0,027 | -                                                                | Phosphoethanolamine N-methyltransferase 1 [Morus notabilis]                                                                                                                     | Under Expressed | D48 |

|              |        |       |                                                              |                                                                                                                 |                 |     |
|--------------|--------|-------|--------------------------------------------------------------|-----------------------------------------------------------------------------------------------------------------|-----------------|-----|
| s00114g08945 | -1,390 | 0,031 | -                                                            | F-box [Gossypium arboreum]                                                                                      | Under Expressed | D48 |
| s00162g11005 | -1,389 | 0,001 | glycosyltransferase family protein 64 protein C5             | PREDICTED: glycosyltransferase family protein 64 protein C5 [Fragaria vesca subsp. vesca]                       | Under Expressed | D48 |
| s00723g23060 | -1,376 | 0,003 | carbonic anhydrase 2-like isoform X1                         | PREDICTED: carbonic anhydrase 2-like isoform X1 [Populus euphratica] gij743930576 ref XP_011009543.1            | Under Expressed | D48 |
| s00172g11375 | -1,376 | 0,004 | N-acetyltransferase p20                                      | putative N-acetyltransferase p20 [Morus notabilis]                                                              | Under Expressed | D48 |
| s00123g09320 | -1,375 | 0,040 | strigolactone esterase DAD2                                  | PREDICTED: probable strigolactone esterase DAD2 [Vitis vinifera]                                                | Under Expressed | D48 |
| s00024g03146 | -1,370 | 0,004 | transcription factor UNE10                                   | Transcription factor UNE10 [Morus notabilis]                                                                    | Under Expressed | D48 |
| s00100g08259 | -1,369 | 0,001 | GRAS family transcription factor family protein              | GRAS family transcription factor family protein [Theobroma cacao]                                               | Under Expressed | D48 |
| s00864g24681 | -1,365 | 0,010 | -                                                            | PREDICTED: protein trichome birefringence-like 2 [Malus domestica]                                              | Under Expressed | D48 |
| s25646g35832 | -1,364 | 0,021 | -                                                            | ***** No hits found *****                                                                                       | Under Expressed | D48 |
| s00274g14545 | -1,348 | 0,006 | type I inositol-1,4,5-trisphosphate 5-phosphatase 2          | Type I inositol-1,4,5-trisphosphate 5-phosphatase 2 [Morus notabilis] gij587911951 gb EXB99791.1                | Under Expressed | D48 |
| s00812g24128 | -1,347 | 0,001 | -                                                            | PREDICTED: protein MIZU-KUSSEI 1 [Malus domestica]                                                              | Under Expressed | D48 |
| s13313g33805 | -1,345 | 0,027 | CASP-like protein                                            | CASP-like protein [Glycine soja]                                                                                | Under Expressed | D48 |
| s00013g01905 | -1,341 | 0,001 | baculoviral IAP repeat-containing protein 7-A                | Baculoviral IAP repeat-containing protein 7-A [Morus notabilis]                                                 | Under Expressed | D48 |
| s00166g11141 | -1,339 | 0,015 | similar to L484_008807                                       | ### Not characterized<br>###:hypothetical protein L484_008807 [Morus notabilis]                                 | Under Expressed | D48 |
| s00624g21741 | -1,336 | 0,043 | -                                                            | ***** No hits found *****                                                                                       | Under Expressed | D48 |
| s17582g34603 | -1,330 | 0,000 | inactive leucine-rich repeat receptor-like protein kinase    | putative inactive leucine-rich repeat receptor-like protein kinase [Morus notabilis] gij587916457 gb EXC04120.1 | Under Expressed | D48 |
| s01396g28585 | -1,325 | 0,004 | ribulose bisphosphate carboxylase small chain, chloroplastic | PREDICTED: ribulose bisphosphate carboxylase small chain, chloroplastic [Cucumis melo]                          | Under Expressed | D48 |
| s00042g04623 | -1,322 | 0,000 | DNA double-strand break repair rad50 ATPase                  | DNA double-strand break repair rad50 ATPase [Theobroma cacao]                                                   | Under Expressed | D48 |
| s00030g03707 | -1,317 | 0,043 | disease resistance protein RPP8                              | Disease resistance protein RPP8 [Morus notabilis]                                                               | Under Expressed | D48 |
| s00018g02489 | -1,314 | 0,034 | transporter arsB                                             | Putative transporter arsB [Morus notabilis]                                                                     | Under Expressed | D48 |
| s00002g00301 | -1,312 | 0,000 | similar to L484_009806                                       | ### Not characterized<br>###:hypothetical protein L484_009806 [Morus notabilis]                                 | Under Expressed | D48 |
| s00102g08338 | -1,311 | 0,013 | GDSL esterase/lipase 1                                       | GDSL esterase/lipase 1 [Morus notabilis]                                                                        | Under Expressed | D48 |
| s12976g33734 | -1,309 | 0,001 | -                                                            | ***** No hits found *****                                                                                       | Under Expressed | D48 |

|              |        |       |                                                                                |                                                                                                            |                 |     |
|--------------|--------|-------|--------------------------------------------------------------------------------|------------------------------------------------------------------------------------------------------------|-----------------|-----|
| s00015g02168 | -1,306 | 0,026 | ankyrin repeatand KH domain-containing protein 1                               | Ankyrin repeatand KH domain-containing protein 1 [Theobroma cacao]                                         | Under Expressed | D48 |
| s00278g14658 | -1,301 | 0,003 | -                                                                              | ### Not characterized<br>###:PREDICTED: uncharacterized protein LOC104234424 [Nicotiana sylvestris]        | Under Expressed | D48 |
| s00640g21976 | -1,300 | 0,026 | plasmamembrane intrinsic protein 1                                             | plasmamembrane intrinsic protein 1;3 [Salix purpurea]                                                      | Under Expressed | D48 |
| s13069g33751 | -1,299 | 0,000 | -                                                                              | PREDICTED: probable LRR receptor-like serine/threonine-protein kinase At1g53440 [Pyrus x bretschneideri]   | Under Expressed | D48 |
| s00256g14079 | -1,287 | 0,000 | similar to L484_026093                                                         | ### Not characterized<br>###:hypothetical protein L484_026093 [Morus notabilis]                            | Under Expressed | D48 |
| s00248g13821 | -1,286 | 0,022 | 18.1 kDa class I heat shock protein-like                                       | PREDICTED: 18.1 kDa class I heat shock protein-like [Eucalyptus grandis]                                   | Under Expressed | D48 |
| s00427g18234 | -1,286 | 0,008 | uncharacterized protein L484_005224                                            | ### Not characterized<br>###:Uncharacterized protein L484_005224 [Morus notabilis]                         | Under Expressed | D48 |
| s00234g13444 | -1,280 | 0,000 | similar to L484_013153                                                         | ### Not characterized<br>###:hypothetical protein L484_013153 [Morus notabilis]                            | Under Expressed | D48 |
| s00366g16919 | -1,276 | 0,000 | RNA binding-like protein                                                       | RNA binding-like protein [Theobroma cacao]                                                                 | Under Expressed | D48 |
| s01953g30314 | -1,272 | 0,043 | photosystem I subunit O-like                                                   | PREDICTED: photosystem I subunit O-like [Nicotiana tomentosiformis]                                        | Under Expressed | D48 |
| s00052g05356 | -1,271 | 0,000 | transcription factor TCP14                                                     | PREDICTED: transcription factor TCP14 [Cucumis melo]                                                       | Under Expressed | D48 |
| s10657g33222 | -1,271 | 0,000 | carbonic anhydrase                                                             | Carbonic anhydrase [Morus notabilis]<br>gij587894062 gb EXB82594.1]                                        | Under Expressed | D48 |
| s00054g05478 | -1,269 | 0,001 | epoxide hydrolase 3                                                            | PREDICTED: epoxide hydrolase 3 [Jatropha curcas]                                                           | Under Expressed | D48 |
| s00433g18352 | -1,267 | 0,000 | floral homeotic protein APETALA 2                                              | Floral homeotic protein APETALA 2 [Morus notabilis]                                                        | Under Expressed | D48 |
| s00299g15204 | -1,265 | 0,002 | -                                                                              | Autophagy-related 18 [Gossypium arboreum]                                                                  | Under Expressed | D48 |
| s00093g07917 | -1,263 | 0,001 | ribulose bisphosphate carboxylase/oxygenase activase, chloroplastic isoform X2 | PREDICTED: ribulose bisphosphate carboxylase/oxygenase activase, chloroplastic isoform X2 [Vitis vinifera] | Under Expressed | D48 |
| s00020g02729 | -1,262 | 0,004 | -                                                                              | ### Not characterized<br>###:hypothetical protein L484_006786 [Morus notabilis]                            | Under Expressed | D48 |
| s00099g08215 | -1,262 | 0,026 | E3 ubiquitin-protein ligase COP1                                               | E3 ubiquitin-protein ligase COP1 [Morus notabilis]                                                         | Under Expressed | D48 |
| s00606g21472 | -1,260 | 0,000 | LRR receptor-like serine/threonine-protein kinase At1g07650                    | PREDICTED: probable LRR receptor-like serine/threonine-protein kinase At1g07650 [Prunus mume]              | Under Expressed | D48 |
| s00583g21099 | -1,258 | 0,028 | transcription factor bHLH30-like                                               | PREDICTED: transcription factor bHLH30-like [Pyrus x bretschneideri]                                       | Under Expressed | D48 |

|              |        |       |                                                               |                                                                                                                         |                 |     |
|--------------|--------|-------|---------------------------------------------------------------|-------------------------------------------------------------------------------------------------------------------------|-----------------|-----|
| s01174g27361 | -1,250 | 0,000 | subtilisin-like protease                                      | Subtilisin-like protease [ <i>Morus notabilis</i> ]                                                                     | Under Expressed | D48 |
| s10019g33074 | -1,245 | 0,040 | similar to L484_002090                                        | ### Not characterized<br>###:hypothetical protein<br>L484_002090 [ <i>Morus notabilis</i> ]                             | Under Expressed | D48 |
| s11216g33358 | -1,242 | 0,041 | -                                                             | ### Not characterized<br>###:hypothetical protein<br>POPTR_0008s07760g [ <i>Populus trichocarpa</i> ]                   | Under Expressed | D48 |
| s00629g21816 | -1,233 | 0,017 | pathogenesis-related thaumatin superfamily protein            | Pathogenesis-related thaumatin superfamily protein [ <i>Theobroma cacao</i> ]<br>gij 508698940 gb EOX90836.1            | Under Expressed | D48 |
| s00777g23722 | -1,228 | 0,042 | -                                                             | **** No hits found ****                                                                                                 | Under Expressed | D48 |
| s00099g08183 | -1,225 | 0,027 | pectate lyase 5                                               | PREDICTED: probable pectate lyase 5 [ <i>Prunus mume</i> ]                                                              | Under Expressed | D48 |
| s00005g00847 | -1,225 | 0,007 | cysteine-rich repeat secretory protein 15-like                | PREDICTED: cysteine-rich repeat secretory protein 15-like [ <i>Prunus mume</i> ]<br>gij 645253502 ref XP_008232604.1    | Under Expressed | D48 |
| s00028g03474 | -1,212 | 0,046 | glutamine dumper 4                                            | Glutamine dumper 4, putative [ <i>Theobroma cacao</i> ]                                                                 | Under Expressed | D48 |
| s00407g17817 | -1,207 | 0,012 | 15.4 kDa class V heat shock protein                           | PREDICTED: 15.4 kDa class V heat shock protein [ <i>Vigna radiata</i> var. <i>radiata</i> ]                             | Under Expressed | D48 |
| s00677g22466 | -1,205 | 0,011 | psbP-like protein 1                                           | PsbP-like protein 1 [ <i>Morus notabilis</i> ]<br>gij 587846706 gb EXB37165.1                                           | Under Expressed | D48 |
| s00066g06329 | -1,200 | 0,047 | calcium-binding protein CML29                                 | putative calcium-binding protein CML29 [ <i>Morus notabilis</i> ]                                                       | Under Expressed | D48 |
| s00124g09397 | -1,190 | 0,005 | auxin efflux carrier component 5                              | Putative auxin efflux carrier component 5 [ <i>Morus notabilis</i> ]                                                    | Under Expressed | D48 |
| s05192g31802 | -1,186 | 0,000 | -                                                             | PREDICTED: light-inducible protein CPRF2 [ <i>Pyrus x bretschneideri</i> ]                                              | Under Expressed | D48 |
| s00125g09435 | -1,182 | 0,007 | psbS                                                          | PsbS [ <i>Pisum sativum</i> ]                                                                                           | Under Expressed | D48 |
| s00421g18111 | -1,180 | 0,048 | -                                                             | ### Not characterized<br>###:hypothetical protein<br>L484_009816 [ <i>Morus notabilis</i> ]                             | Under Expressed | D48 |
| s00066g06328 | -1,177 | 0,031 | nitrate reductase                                             | nitrate reductase [ <i>Morus alba</i> ]<br>gij 595583466 gb AHM76764.1                                                  | Under Expressed | D48 |
| s00080g07204 | -1,175 | 0,037 | -                                                             | **** No hits found ****                                                                                                 | Under Expressed | D48 |
| s00603g21412 | -1,172 | 0,001 | -                                                             | PREDICTED: protein trichome birefringence-like 19 [ <i>Populus euphratica</i> ]                                         | Under Expressed | D48 |
| s00841g24452 | -1,170 | 0,000 | G-type lectin S-receptor-like serine/threonine-protein kinase | G-type lectin S-receptor-like serine/threonine-protein kinase [ <i>Morus notabilis</i> ]<br>gij 587873316 gb EXB62507.1 | Under Expressed | D48 |
| s00310g15541 | -1,170 | 0,049 | bidirectional sugar transporter SWEET2a                       | Bidirectional sugar transporter SWEET2a [ <i>Morus notabilis</i> ]                                                      | Under Expressed | D48 |
| s00040g04475 | -1,169 | 0,043 | chaperone protein dnaJ 11                                     | Chaperone protein dnaJ 11 [ <i>Morus notabilis</i> ]                                                                    | Under Expressed | D48 |

|              |        |       |                                                                                  |                                                                                                                      |                 |     |
|--------------|--------|-------|----------------------------------------------------------------------------------|----------------------------------------------------------------------------------------------------------------------|-----------------|-----|
| s00764g23570 | -1,166 | 0,011 | DUF630 family protein                                                            | DUF630 family protein [Medicago truncatula]                                                                          | Under Expressed | D48 |
| s00025g03187 | -1,163 | 0,023 | mitochondrial carnitine/acylcarnitine carrier-like protein                       | PREDICTED: mitochondrial carnitine/acylcarnitine carrier-like protein [Nelumbo nucifera]                             | Under Expressed | D48 |
| s01310g28138 | -1,162 | 0,037 | rubredoxin family protein                                                        | Rubredoxin family protein [Theobroma cacao]                                                                          | Under Expressed | D48 |
| s00130g09635 | -1,162 | 0,000 | cyclopropane-fatty-acyl-phospholipid synthase isoform 1                          | Cyclopropane-fatty-acyl-phospholipid synthase isoform 1 [Theobroma cacao] gi 590659737 ref XP_007035210.1            | Under Expressed | D48 |
| s00144g10239 | -1,159 | 0,000 | UDP-glycosyltransferase 74F2                                                     | UDP-glycosyltransferase 74F2 [Morus notabilis]                                                                       | Under Expressed | D48 |
| s00382g17277 | -1,147 | 0,007 | sialidase                                                                        | Sialidase [Gossypium arboreum]                                                                                       | Under Expressed | D48 |
| s00036g04174 | -1,146 | 0,000 | similar to L484_003808                                                           | ### Not characterized<br>###:hypothetical protein L484_003808 [Morus notabilis]                                      | Under Expressed | D48 |
| s01289g28022 | -1,146 | 0,009 | serine/threonine-protein kinase BRI1-like 2-like                                 | PREDICTED: serine/threonine-protein kinase BRI1-like 2-like [Citrus sinensis]                                        | Under Expressed | D48 |
| s00031g03737 | -1,140 | 0,030 | receptor-like protein kinase At5g61350                                           | PREDICTED: probable receptor-like protein kinase At5g61350 [Cucumis melo]                                            | Under Expressed | D48 |
| s00141g10109 | -1,140 | 0,019 | -                                                                                | **** No hits found ****                                                                                              | Under Expressed | D48 |
| s10313g33141 | -1,135 | 0,048 | -                                                                                | **** No hits found ****                                                                                              | Under Expressed | D48 |
| s13434g33823 | -1,134 | 0,022 | -                                                                                | PREDICTED: probable LRR receptor-like serine/threonine-protein kinase At1g53440 isoform X1 [Malus domestica]         | Under Expressed | D48 |
| s00315g15658 | -1,132 | 0,000 | receptor-like protein kinase                                                     | putative receptor-like protein kinase [Morus notabilis]                                                              | Under Expressed | D48 |
| s00344g16346 | -1,127 | 0,004 | similar to L484_028070                                                           | ### Not characterized<br>###:hypothetical protein L484_028070 [Morus notabilis]                                      | Under Expressed | D48 |
| s00150g10523 | -1,127 | 0,008 | aquaporin PIP2-1                                                                 | Aquaporin PIP2-1 [Morus notabilis] gi 587896628 gb EXB85110.1                                                        | Under Expressed | D48 |
| s00767g23610 | -1,121 | 0,020 | similar to L484_003463                                                           | ### Not characterized<br>###:hypothetical protein L484_003463 [Morus notabilis]                                      | Under Expressed | D48 |
| s00531g20237 | -1,121 | 0,046 | BON1-associated protein 1-like                                                   | PREDICTED: BON1-associated protein 1-like [Malus domestica]                                                          | Under Expressed | D48 |
| s00317g15722 | -1,119 | 0,000 | -                                                                                | PREDICTED: transcription activator GLK1 [Vitis vinifera]                                                             | Under Expressed | D48 |
| s00080g07183 | -1,116 | 0,000 | J domain-containing protein requiredfor chloroplast accumulation response 1-like | PREDICTED: J domain-containing protein requiredfor chloroplast accumulation response 1-like [Pyrus x bretschneideri] | Under Expressed | D48 |
| s00002g00378 | -1,113 | 0,016 | photosystem II reaction center W protein                                         | Photosystem II reaction center W protein [Morus notabilis]                                                           | Under Expressed | D48 |



|              |        |       |                                                   |                                                                                            |                 |     |
|--------------|--------|-------|---------------------------------------------------|--------------------------------------------------------------------------------------------|-----------------|-----|
| s00389g17416 | -1,104 | 0,008 | psbP-like protein 1                               | PsbP-like protein 1 [Morus notabilis]<br>gi 587876233 gb EXB65325.1]                       | Under Expressed | D48 |
| s01159g27250 | -1,103 | 0,017 | similar to L484_009861                            | ### Not characterized<br>###:hypothetical protein<br>L484_009861 [Morus notabilis]         | Under Expressed | D48 |
| s00470g19121 | -1,100 | 0,014 | similar to L484_003373                            | ### Not characterized<br>###:hypothetical protein<br>L484_003373 [Morus notabilis]         | Under Expressed | D48 |
| s00014g02038 | -1,098 | 0,001 | -                                                 | PREDICTED: protein YLS9 [Malus domestica]                                                  | Under Expressed | D48 |
| s00102g08318 | -1,098 | 0,007 | von Willebrand factor A domain-containing protein | von Willebrand factor A domain-containing protein [Morus notabilis]                        | Under Expressed | D48 |
| s00365g16874 | -1,096 | 0,000 | cinnamoyl-CoA reductase 1-like                    | PREDICTED: cinnamoyl-CoA reductase 1-like [Vitis vinifera]                                 | Under Expressed | D48 |
| s00339g16236 | -1,090 | 0,045 | similar to L484_008662                            | ### Not characterized<br>###:hypothetical protein<br>L484_008662 [Morus notabilis]         | Under Expressed | D48 |
| s00359g16723 | -1,088 | 0,047 | -                                                 | PREDICTED: protein SSUH2 homolog [Pyrus x bretschneideri]                                  | Under Expressed | D48 |
| s01598g29417 | -1,081 | 0,001 | -                                                 | PREDICTED: protein MIZU-KUSSEI 1 [Vitis vinifera]                                          | Under Expressed | D48 |
| s00207g12600 | -1,079 | 0,009 | uncharacterized protein LOC103327288              | ### Not characterized<br>###:PREDICTED: uncharacterized protein LOC103327288 [Prunus mume] | Under Expressed | D48 |
| s01047g26453 | -1,076 | 0,000 | OTU domain-containing protein DDB_G0284757-like   | PREDICTED: OTU domain-containing protein DDB_G0284757-like [Pyrus x bretschneideri]        | Under Expressed | D48 |
| s01080g26691 | -1,074 | 0,000 | ADP,ATP carrier protein ER-ANT1                   | ADP,ATP carrier protein ER-ANT1 [Morus notabilis]                                          | Under Expressed | D48 |
| s00387g17385 | -1,073 | 0,000 | zinc finger CCCH domain-containing protein 18     | Zinc finger CCCH domain-containing protein 18 [Morus notabilis]                            | Under Expressed | D48 |
| s18592g34793 | -1,067 | 0,033 | -                                                 | ***** No hits found *****                                                                  | Under Expressed | D48 |
| s00017g02395 | -1,065 | 0,008 | PGR5-like protein 1B, chloroplastic               | PREDICTED: PGR5-like protein 1B, chloroplastic [Fragaria vesca subsp. vesca]               | Under Expressed | D48 |
| s01603g29434 | -1,064 | 0,044 | GDP-mannose 3,5-epimerase 1                       | GDP-mannose 3,5-epimerase 1 [Morus notabilis]                                              | Under Expressed | D48 |
| s00318g15750 | -1,061 | 0,039 | ROP interactive partner 5 isoform 2               | ROP interactive partner 5 isoform 2 [Theobroma cacao]                                      | Under Expressed | D48 |
| s00841g24450 | -1,061 | 0,000 | glyoxylate reductase/hydroxypyruvate reductase    | Glyoxylate reductase/hydroxypyruvate reductase [Morus notabilis]                           | Under Expressed | D48 |

|              |        |       |                                                            |                                                                                                 |                 |     |
|--------------|--------|-------|------------------------------------------------------------|-------------------------------------------------------------------------------------------------|-----------------|-----|
| s00069g06517 | -1,060 | 0,013 | GATA transcription factor 22                               | Putative GATA transcription factor 22 [Morus notabilis]                                         | Under Expressed | D48 |
| s00649g22100 | -1,057 | 0,007 | ca2+-binding protein 1                                     | Ca2+-binding protein 1 [Theobroma cacao]                                                        | Under Expressed | D48 |
| s00851g24545 | -1,054 | 0,001 | receptor-like protein kinase THESEUS 1                     | Receptor-like protein kinase THESEUS 1 [Morus notabilis]                                        | Under Expressed | D48 |
| s00536g20334 | -1,054 | 0,002 | -                                                          | ### Not characterized<br>###:PREDICTED: uncharacterized protein LOC104613531 [Nelumbo nucifera] | Under Expressed | D48 |
| s00247g13785 | -1,051 | 0,004 | nudix hydrolase 1                                          | Nudix hydrolase 1 [Morus notabilis] gi 587876479 gb EXB65566.1]                                 | Under Expressed | D48 |
| s00351g16519 | -1,051 | 0,032 | stress enhanced protein 1                                  | Stress enhanced protein 1, putative [Theobroma cacao]                                           | Under Expressed | D48 |
| s00014g02046 | -1,048 | 0,004 | hydrolase C777.06c-like isoform X1                         | PREDICTED: putative hydrolase C777.06c-like isoform X1 [Citrus sinensis]                        | Under Expressed | D48 |
| s00767g23609 | -1,048 | 0,011 | -                                                          | Protein ApaG [Morus notabilis] gi 587838935 gb EXB29618.1]                                      | Under Expressed | D48 |
| s00055g05571 | -1,045 | 0,002 | peptide transporter                                        | putative peptide transporter [Morus notabilis]                                                  | Under Expressed | D48 |
| s00429g18276 | -1,041 | 0,000 | glutamate receptor 3.2                                     | Glutamate receptor 3.2 [Morus notabilis]                                                        | Under Expressed | D48 |
| s00311g15565 | -1,038 | 0,017 | FK506-binding protein 4-like isoform X1                    | PREDICTED: FK506-binding protein 4-like isoform X1 [Brassica napus]                             | Under Expressed | D48 |
| s00031g03721 | -1,038 | 0,011 | pentatricopeptide repeat-containing protein At1g62720-like | PREDICTED: pentatricopeptide repeat-containing protein At1g62720-like [Pyrus x bretschneideri]  | Under Expressed | D48 |
| s00213g12797 | -1,037 | 0,035 | peptidyl-prolyl cis-trans isomerase FKBP18                 | Peptidyl-prolyl cis-trans isomerase FKBP18 [Morus notabilis]                                    | Under Expressed | D48 |
| s00507g19822 | -1,037 | 0,015 | peroxiredoxin Q                                            | Peroxiredoxin Q [Morus notabilis] gi 587847877 gb EXB38195.1]                                   | Under Expressed | D48 |
| s00186g11873 | -1,033 | 0,022 | -                                                          | PREDICTED: protein ABIL2 [Prunus mume]                                                          | Under Expressed | D48 |
| s00001g00127 | -1,031 | 0,011 | 12-oxophytodienoate reductase 11                           | Putative 12-oxophytodienoate reductase 11 [Morus notabilis]                                     | Under Expressed | D48 |
| s00479g19277 | -1,028 | 0,010 | purple acid phosphatase 3                                  | Purple acid phosphatase 3 [Morus notabilis]                                                     | Under Expressed | D48 |
| s00019g02609 | -1,028 | 0,008 | similar to L484_005726                                     | ### Not characterized<br>###:hypothetical protein L484_005726 [Morus notabilis]                 | Under Expressed | D48 |
| s00069g06527 | -1,027 | 0,011 | light-inducible protein CPRF2                              | PREDICTED: light-inducible protein CPRF2 [Prunus mume]                                          | Under Expressed | D48 |
| s01096g26796 | -1,026 | 0,001 | BOI-related E3 ubiquitin-protein ligase 1                  | PREDICTED: BOI-related E3 ubiquitin-protein ligase 1 [Fragaria vesca subsp. vesca]              | Under Expressed | D48 |

|              |        |       |                                              |                                                                                 |                 |     |
|--------------|--------|-------|----------------------------------------------|---------------------------------------------------------------------------------|-----------------|-----|
| s00186g11875 | -1,026 | 0,021 | carboxylesterase np                          | carboxylesterase np, putative [Ricinus communis]                                | Under Expressed | D48 |
| s00862g24655 | -1,026 | 0,006 | similar to L484_023026                       | ### Not characterized<br>###:hypothetical protein L484_023026 [Morus notabilis] | Under Expressed | D48 |
| s00221g13048 | -1,023 | 0,003 | similar to L484_021121                       | ### Not characterized<br>###:hypothetical protein L484_021121 [Morus notabilis] | Under Expressed | D48 |
| s00274g14555 | -1,021 | 0,000 | ribose-phosphate pyrophosphokinase 1         | Ribose-phosphate pyrophosphokinase 1 [Morus notabilis]                          | Under Expressed | D48 |
| s00972g25788 | -1,019 | 0,011 | -                                            | Protein bicaudal C-1-B-like protein [Morus notabilis]                           | Under Expressed | D48 |
| s00178g11563 | -1,015 | 0,023 | E3 ubiquitin-protein ligase mib1             | E3 ubiquitin-protein ligase mib1 [Morus notabilis]                              | Under Expressed | D48 |
| s00057g05753 | -1,010 | 0,016 | membrane-associated kinase regulator 1       | PREDICTED: probable membrane-associated kinase regulator 1 [Sesamum indicum]    | Under Expressed | D48 |
| s00051g05278 | -1,007 | 0,000 | UDP-glycosyltransferase 71C3                 | UDP-glycosyltransferase 71C3 [Morus notabilis]                                  | Under Expressed | D48 |
| s00039g04383 | -1,004 | 0,047 | ribose-5-phosphate isomerase                 | putative ribose-5-phosphate isomerase [Morus notabilis]                         | Under Expressed | D48 |
| s01358g28405 | -1,004 | 0,004 | similar to L484_021354                       | ### Not characterized<br>###:hypothetical protein L484_021354 [Morus notabilis] | Under Expressed | D48 |
| s00900g25093 | -1,003 | 0,027 | similar to L484_023812                       | ### Not characterized<br>###:hypothetical protein L484_023812 [Morus notabilis] | Under Expressed | D48 |
| s00234g13464 | -1,001 | 0,015 | UDP-glycosyltransferase 85A5-like isoform X1 | PREDICTED: UDP-glycosyltransferase 85A5-like isoform X1 [Prunus mume]           | Under Expressed | D48 |
| s00346g16390 | -1,000 | 0,000 | NAC domain-containing protein 94             | Putative NAC domain-containing protein 94 [Morus notabilis]                     | Under Expressed | D48 |

**Table S3.** qRT/PCR analysis. The ID code of genes analyzed by qRT-PCR (according to Mori et al., 2017), sequence of Forward (F) and Reverse (R) PCR primers, fold change expression values as ratio between salt treated and control plants and P value of the difference are reported. The three housekeeping reference genes are also reported.

|                                                    |                         |                                 |
|----------------------------------------------------|-------------------------|---------------------------------|
| ID: s01287g28013 (aldehyde dehydrogenase)          |                         |                                 |
| F: <b>GCAGCAGGCATTGTGACAAA</b>                     |                         | R: <b>GCTCGGATTGACCTTGAAACA</b> |
| <b>Fold change reference</b>                       | <b>Fold change gene</b> | <b>P value Anova one-way</b>    |
| 1                                                  | 3.415305463             |                                 |
| 1                                                  | 2.690303073             | 0.000881                        |
| 1                                                  | 2.828602881             |                                 |
| ID: s00040g04475 (Chaperone protein)               |                         |                                 |
| F: <b>ATCCACGAAGCGTATTCCAC</b>                     |                         | R: <b>ATCGGTTTCCCATGTTCTTG</b>  |
| <b>Fold change reference</b>                       | <b>Fold change gene</b> | <b>P value Anova one-way</b>    |
| 1                                                  | 0.150455062             |                                 |
| 1                                                  | 0.037764794             | 0.000018                        |
| 1                                                  | 0.032260695             |                                 |
| ID: s000212g12766 (Transcription factor bHLH)      |                         |                                 |
| F: <b>CCAGCTCCTCTTCTCCATAGACA</b>                  |                         | R: <b>CCCCGACATTTCCCATCA</b>    |
| <b>Fold change reference</b>                       | <b>Fold change gene</b> | <b>P value Anova one-way</b>    |
| 1                                                  | 0.05178047              |                                 |
| 1                                                  | 0.110895916             | 0.00001                         |
| 1                                                  | 0.050968089             |                                 |
| ID: s00679g22491 (Nuclear Transcription Factor Y ) |                         |                                 |
| F: <b>ATACCACTCGCTCTTGGGTGAT</b>                   |                         | R: <b>GGTGCTGCCCGAGAAT</b>      |
| <b>Fold change reference</b>                       | <b>Fold change gene</b> | <b>P value Anova one-way</b>    |
| 1                                                  | 3.719102942             |                                 |
| 1                                                  | 2.019555909             | 0.020774                        |
| 1                                                  | 3.885867461             |                                 |
| ID: s00139g10024 (Highly ABA induced PP2C)         |                         |                                 |
| F: <b>GCGAAATGGTCAAAGCATCT</b>                     |                         | R: <b>TGTCGTGTCCGTATTCCGTA</b>  |
| <b>Fold change reference</b>                       | <b>Fold change gene</b> | <b>P value Anova one-way</b>    |
| 1                                                  | 5.78557063              | 0.080443                        |

24 d

48 d

1 13.86213404

1 4.218150485

---

ID: s00679g22491 (NuclearTranscriptionFactorY )

---

F: **ATACCACTCGCTCTTGGGTGAT** R: **GGTGCTGCCCGAGAAT**

---

| Fold change reference | Fold change gene | P value Anova one-way |
|-----------------------|------------------|-----------------------|
|-----------------------|------------------|-----------------------|

---

|   |             |  |
|---|-------------|--|
| 1 | 2.604361916 |  |
|---|-------------|--|

|   |             |          |
|---|-------------|----------|
| 1 | 3.057568449 | 0.000246 |
|---|-------------|----------|

|   |             |  |
|---|-------------|--|
| 1 | 2.655527536 |  |
|---|-------------|--|

---

ID: s00085g07448 (actin-encoding gene)

---

F: **CAATCGGTGCTGAGCGTTT** R: **TCCTATCAAGGATGGCTGGAA**

---

ID: s00104g08427 (alpha-tubulin-encoding gene)

---

F: **GATGTTCCGCCGTGTGAGT** R: **CCAATGCAAGAAAGCCTTCCT**

Ref.

---

ID: LN999821 (18S rRNA)

---

F: **GGCGGATGTTGCTTTTAGGA** R: **TTCAGCCTTGCGACCATACTC**

---

**Table S4.** Up (log FC > 1) and down-regulated (log FC < -1) genes between early (24 days) and late (48 days) saline stress. Log FC= log<sub>2</sub> fold change.

| ID           | D24<br>LOG FC | D48<br>LOG<br>FC | DESCRIPTION                                            | REGU<br>LATIO<br>N |
|--------------|---------------|------------------|--------------------------------------------------------|--------------------|
| S00694G22691 | 4,87          | 5,58             | Predicted protein                                      | Up                 |
| S00785G23824 | 3,08          | 3,51             | Isoflavone 2'-hydroxylase                              | Up                 |
| S00018G02534 | 2,81          | 3,5              | late blight resistance R1B-19                          | Up                 |
| S00003G00605 | 2,24          | 3,25             | Predicted protein                                      | Up                 |
| S00001G00053 | 1,96          | 2,53             | mitochondrial protein<br>AtMg00810-like                | Up                 |
| S00786G23838 | 1,06          | 2,41             | Subtilisin protease                                    | Up                 |
| S00247G13804 | 2,21          | 2,05             | E3 ubiquitin-protein RHA2A                             | Up                 |
| S00444G18584 | 1,21          | 1,99             | Predicted protein                                      | Up                 |
| S00331G16057 | 1,36          | 1,95             | Serine/threonine kinase SAPK3,<br>isoform 2            | Up                 |
| S00261G14202 | 1,74          | 1,88             | acyl-protein thioesterase 2                            | Up                 |
| S00017G02349 | 1,15          | 1,86             | Tropinone reductase                                    | Up                 |
| S00679G22491 | 2             | 1,83             | Nuclear transcription factor Y<br>subunit A            | Up                 |
| S02020G30426 | 1,59          | 1,82             | Ty1-copia retrotranspon                                | Up                 |
| S00067G06394 | 1,71          | 1,76             | Serine/threonine kinase                                | Up                 |
| S00423G18151 | 1,36          | 1,73             | Predicted protein                                      | Up                 |
| S00038G04301 | 1,43          | 1,71             | Leucine-rich repeat receptor<br>protein kinase EXS     | Up                 |
| S00319G15780 | 1,65          | 1,6              | Alpha-1,4 glucan phosphorylase<br>L isozyme            | Up                 |
| S00041G04572 | 1,56          | 1,57             | Mitochondrial acylcarnitine carrier<br>protein( CACL ) | Up                 |
| S00057G05768 | 1,05          | 1,57             | Predicted membrane protein                             | Up                 |
| S00114G08941 | 2,19          | 1,49             | DNA ligase                                             | Up                 |
| S00014G02018 | 1,48          | 1,46             | ABC transporter C family<br>member 8                   | Up                 |
| S00237G13551 | 1,08          | 1,4              | Two-component response<br>regulator                    | Up                 |
| S00147G10413 | 1,73          | 1,37             | Granule-bound starch synthase<br>1                     | Up                 |
| S00100G08254 | 1,9           | 1,34             | Phosphoglucomutase                                     | Up                 |
| S00080G07240 | 6,92          | 1,28             | Cytochrome P450                                        | Up                 |
| S01090G26759 | 1,5           | 1,28             | J domain-containing protein                            | Up                 |

|              |       |       |                                                            |      |
|--------------|-------|-------|------------------------------------------------------------|------|
|              |       |       | chloroplast isoform X1                                     |      |
| S00014G02014 | 1,25  | 1,26  | ABC transporter C family member 8                          | Up   |
| S00001G00054 | 1,09  | 1,24  | Predicted protein                                          | Up   |
| S00281G14755 | 1,7   | 1,24  | Adagio protein 3                                           | Up   |
| S00033G03917 | 1,07  | 1,19  | aspartate, glycine, lysine and serine-rich protein         | Up   |
| S00896G25044 | 1,46  | 1,19  | Ribonuclease J                                             | Up   |
| S00051G05309 | 1,04  | 1,18  | protein DA1-related 2                                      | Up   |
| S00293G15070 | 1,12  | 1,16  | senescence-associated protein family                       | Up   |
| S00153G10646 | 2,57  | 1,15  | B3 domain-containing transcription factor VRN1             | Up   |
| S00704G22801 | 1,2   | 1,15  | Gamma-irradiation and mitomycin induced isoform 1          | Up   |
| S00248G13812 | 1,19  | 1,12  | Tubulin beta-1 chain                                       | Up   |
| S00003G00556 | 1,13  | 1,11  | Putative arsenical pump-driving ATPase                     | Up   |
| S00698G22740 | 1,18  | 1,07  | Zinc transporter 11                                        | Up   |
| S10596G33210 | 1,37  | 1,06  | Transcription factor TGA7                                  | Up   |
| S00470G19104 | -5,15 | -4,99 | Calcium-binding EF-hand family protein                     | Down |
| S00458G18864 | -4,33 | -2,99 | (RS)-norcoclaurine methyltransferase 6-O-                  | Down |
| S00004G00779 | -4,27 | -2,93 | DnaJ homolog subfamily C                                   | Down |
| S00192G12067 | -4,12 | -3,85 | Aspartic proteinase nepenthesin                            | Down |
| S00040G04463 | -4    | -2,41 | GAST-like gene                                             | Down |
| S06315G32096 | -3,68 | -3,19 | (RS)-norcoclaurine methyltransferase 6-O-                  | Down |
| S00116G09014 | -3,55 | -2,11 | AP2/ERF and B3 domain-containing transcription factor RAV1 | Down |
| S03907G31418 | -3,55 | -3,12 | Predicted protein                                          | Down |
| S00082G07325 | -3,48 | -2,42 | RING finger and CHY zinc finger domain-containing protein  | Down |
| S00040G04475 | -3,27 | -1,17 | Chaperone protein dnaJ 11                                  | Down |
| S00234G13451 | -3,23 | -3,21 | transcription factor bHLH137                               | Down |
| S00232G13386 | -3,14 | -2,94 | Predicted protein                                          | Down |

|              |       |       |                                                   |      |
|--------------|-------|-------|---------------------------------------------------|------|
| S00143G10196 | -3,1  | -4,08 | Predicted protein                                 | Down |
| S00212G12766 | -3,07 | -1,79 | transcription factor bHLH93                       | Down |
| S00085G07457 | -3,04 | -2,59 | CASP-like protein 4D1                             | Down |
| S00220G13014 | -2,91 | -1,71 | pectinesterase                                    | Down |
| S00640G21976 | -2,76 | -1,3  | plasmamembraneintrinsicprotein<br>1               | Down |
| S00470G19108 | -2,61 | -4,37 | Polcalcin Jun o 2                                 | Down |
| S00270G14464 | -2,58 | -1,69 | F-box/kelch-repeat protein                        | Down |
| S00469G19086 | -2,53 | -3,34 | Predicted protein                                 | Down |
| S00800G23992 | -2,44 | -2,31 | Glutamine amidotransferase                        | Down |
| S00483G19354 | -2,42 | -1,52 | Predicted protein                                 | Down |
| S00278G14658 | -2,4  | -1,3  | Predicted protein                                 | Down |
| S00088G07643 | -1,98 | -1,47 | Pseudo response regulator,<br>isoform 4           | Down |
| S00539G20370 | -1,98 | -1,44 | Octicosapeptide/Phox/Bem1p                        | Down |
| S02447G30886 | -1,94 | -1,6  | Lupeol synthase                                   | Down |
| S00309G15490 | -1,93 | -1,99 | CAMP-regulated<br>phosphoprotein 19, isoform 1    | Down |
| S00232G13384 | -1,89 | -1,77 | Predicted protein                                 | Down |
| S00003G00585 | -1,74 | -2,22 | Lysine decarboxylase family<br>protein, isoform 2 | Down |
| S00378G17180 | -1,73 | -1,56 | LIM and calponin domains-<br>containing protein   | Down |
| S00361G16776 | -1,68 | -1,41 | CONSTANS-LIKE 11 (zinc<br>finger)                 | Down |
| S00098G08156 | -1,52 | -1,56 | RING-H2 finger protein ATL1                       | Down |
| S00006G01047 | -1,39 | -2,1  | Phosphoenolpyruvate/<br>phosphate translocator    | Down |
| S00102G08339 | -1,29 | -1,5  | GDSL esterase/lipase                              | Down |
| S00137G09958 | -1,25 | -1,61 | cytochrome P450                                   | Down |
| S00311G15565 | -1,24 | -1,04 | FK506-binding protein 4 isoform<br>X1             | Down |
| S00162G11005 | -1,22 | -1,39 | glycosyltransferase family<br>protein             | Down |
| S00537G20336 | -1,22 | -1,62 | cyclic nucleotide-gated<br>ionchannel             | Down |
| S00427G18234 | -1,21 | -1,29 | Predicted protein                                 | Down |
| S01598G29417 | -1,2  | -1,08 | protein MIZU-KUSSEI 1                             | Down |
| S01096G26796 | -1,18 | -1,03 | BOI-related E3 ubiquitin-<br>proteinligase        | Down |



|              |       |       |                                       |      |
|--------------|-------|-------|---------------------------------------|------|
| S00812G24128 | -1,16 | -1,35 | protein MIZU-KUSSEI 1                 | Down |
| S00764G23570 | -1,12 | -1,17 | DUF630 family protein                 | Down |
| S00013G01905 | -1,06 | -1,34 | IAP repeat-containing protein         | Down |
| S00344G16346 | -1,06 | -1,13 | Predicted protein                     | Down |
| S00274G14555 | -1,02 | -1,02 | Ribose-phosphate<br>pyrophosphokinase | Down |

---

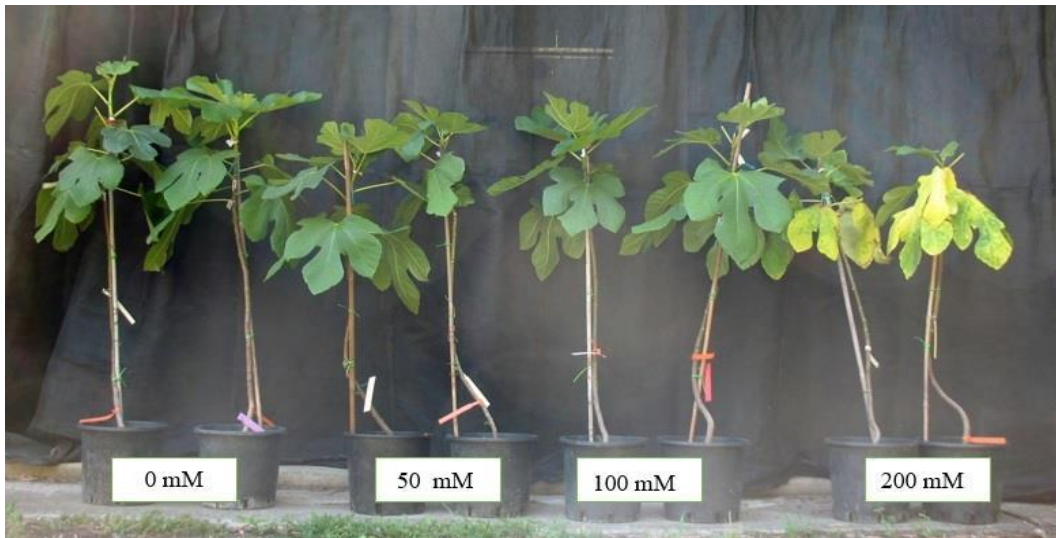

**Fig. S1.** *Ficus carica* (cv. Dottato) plants after 7 weeks of salinization at different NaCl concentrations. The transcriptome analysis was performed on 0 and 100 mM NaCl-treated plants only.

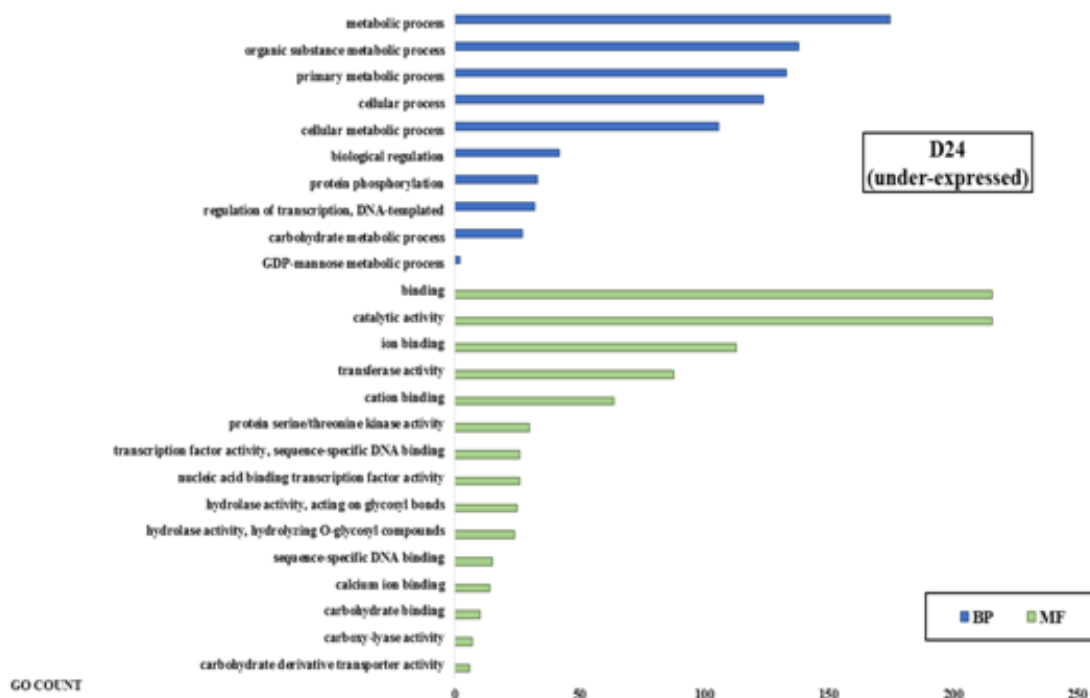

**Fig. S2.** Enriched GO terms in genes under-expressed in leaves of *F. carica* after salt treatment. BP = Biological processes; MF = Molecular function.

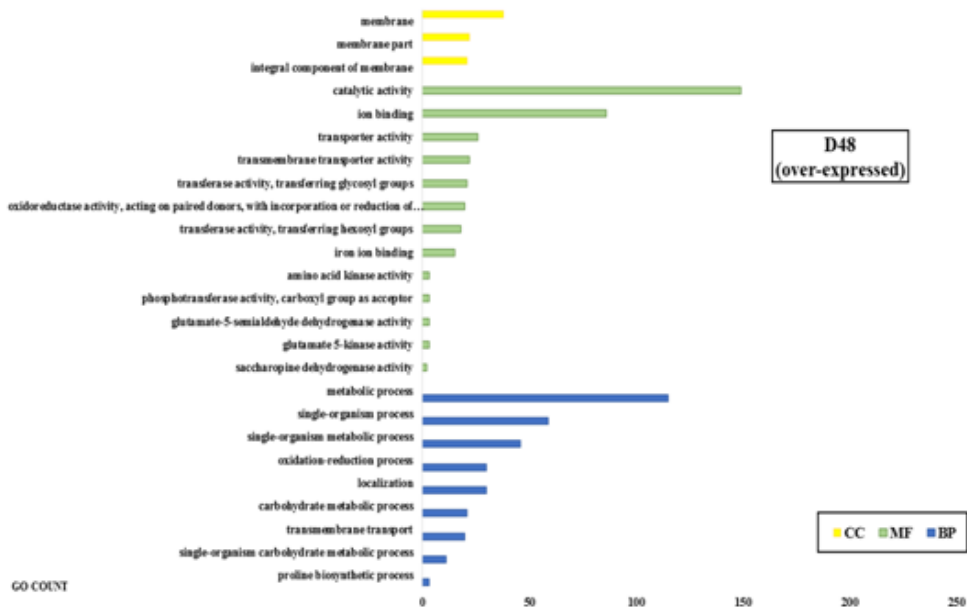

**Fig. S3.** Enriched GO terms in genes over-expressed in leaves of *F. carica* after salt treatment. CC = Cellular components; MF = Molecular function; BP = Biological process.

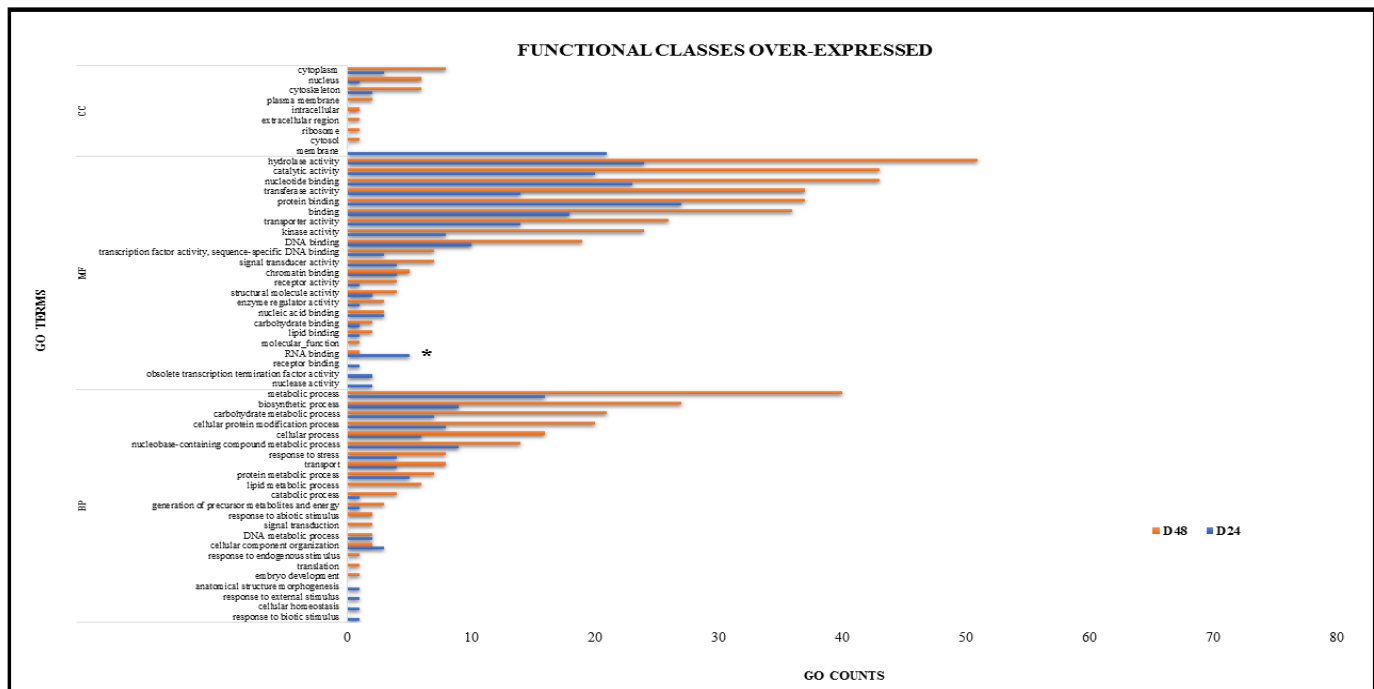

**Fig. S4.** GO terms of D24 and D48 over-expressed genes. Blue and orange bars show respectively distribution of GO-slim at D24 (blue) and D48 (red). BP = Biological processes; MF = Molecular functions; CC = Cellular components. Asterisks indicate that difference is significant at  $p < 0.05$ .

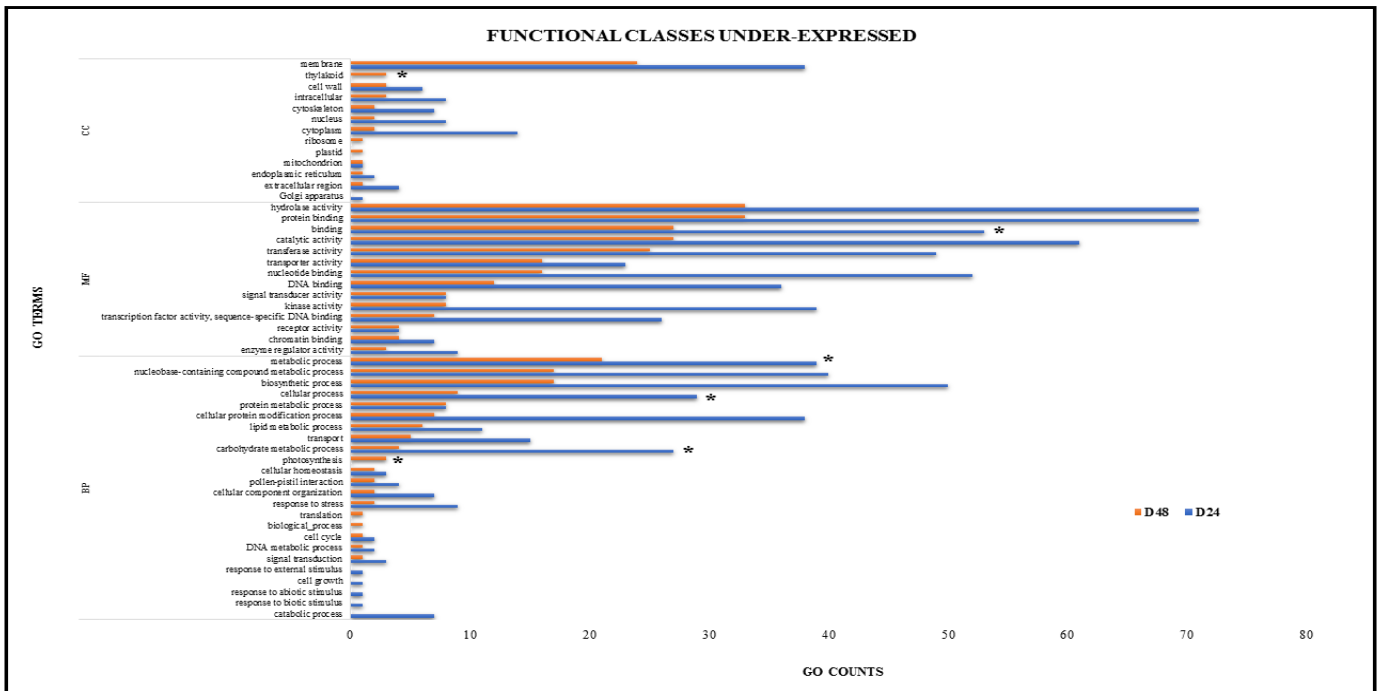

**Fig. S5.** GO terms of D24 and D48 under-expressed genes. Blue and orange bars show respectively distribution of GO-slim at D24 (blue) and D48 (red). BP = Biological processes; MF = Molecular functions; CC = Cellular components. Asterisks indicate that difference is significant at  $p < 0.05$

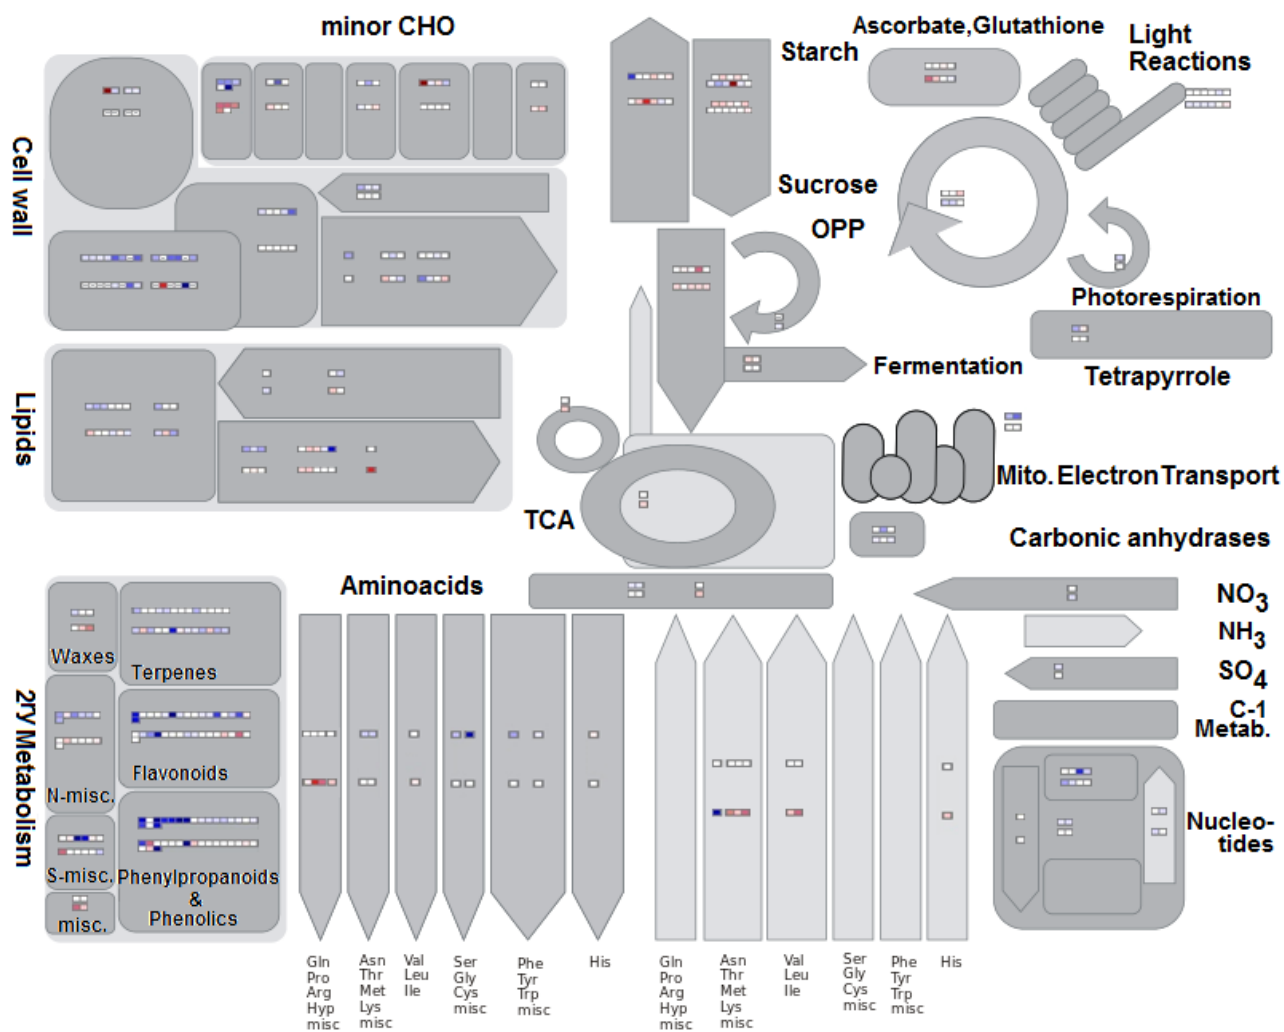

**Fig. S6.** MAPMAN sketch of metabolic pathways comparing up- and down-regulated genes (small squares) under salt treatments at D24 (above) and D48 (below). The differential expression scale ranges from dark blue ( $\log FC < -4.5$ ) to dark red ( $\log FC > 4.5$ ).
